# Supplementary material for: A Combination of Library Screening and Rational Mutagenesis Expands the Available Color Palette of the Smallest Fluorogen-Activating Protein Tag nanoFAST
Source: MDPI journal article supplement (doi:10.3390/ijms25053054), 2024-03-06

## Contents

|                                                                                        |             |
|----------------------------------------------------------------------------------------|-------------|
| <b>1. Proteins purification and sequences</b>                                          | <b>S2</b>   |
| <b>2. Screening in vitro</b>                                                           | <b>S3</b>   |
| <b>3. Determination of affinity constants</b>                                          | <b>S66</b>  |
| <b>4. Fluorescence Lifetime Measurements</b>                                           | <b>S76</b>  |
| <b>5. Spectra of complexes</b>                                                         | <b>S81</b>  |
| <b>6. Fluorescent microscopy</b>                                                       | <b>S82</b>  |
| <b>7. Compounds description</b>                                                        | <b>S83</b>  |
| <b>8. References</b>                                                                   | <b>S108</b> |
| <b>9. Copies of <math>^1\text{H}</math> and <math>^{13}\text{C}</math> NMR spectra</b> | <b>S109</b> |

## 1. Proteins purification and sequences

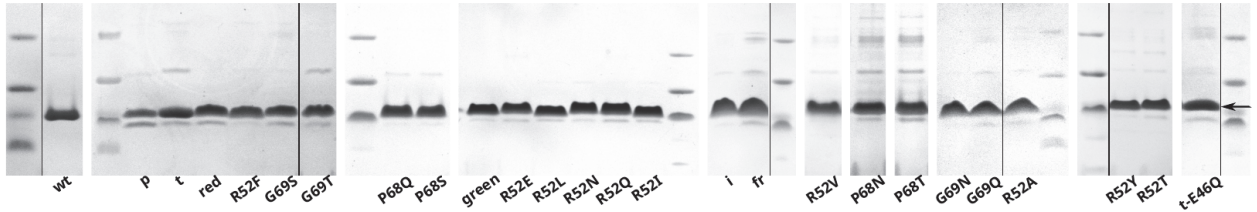

**Figure S1.1.** Purified nanoFAST and its mutant variants. Protein designations used are listed at **Table S1.1**. The bands corresponding to target proteins are indicated with an arrow. Black vertical separators are introduced between the lines that are not adjacent within the same gel. The full-sized raw Tris-Tricine-SDS-PAGEs for each protein line are shown at Figure S1.2. Protein molecular weight markers: 26.6 kDa, 17 kDa, 14.2 kDa, 6.5 kDa, 3.5 kDa. Molecular weight of the wild type nanoFAST (wt) is 11.9 kDa.

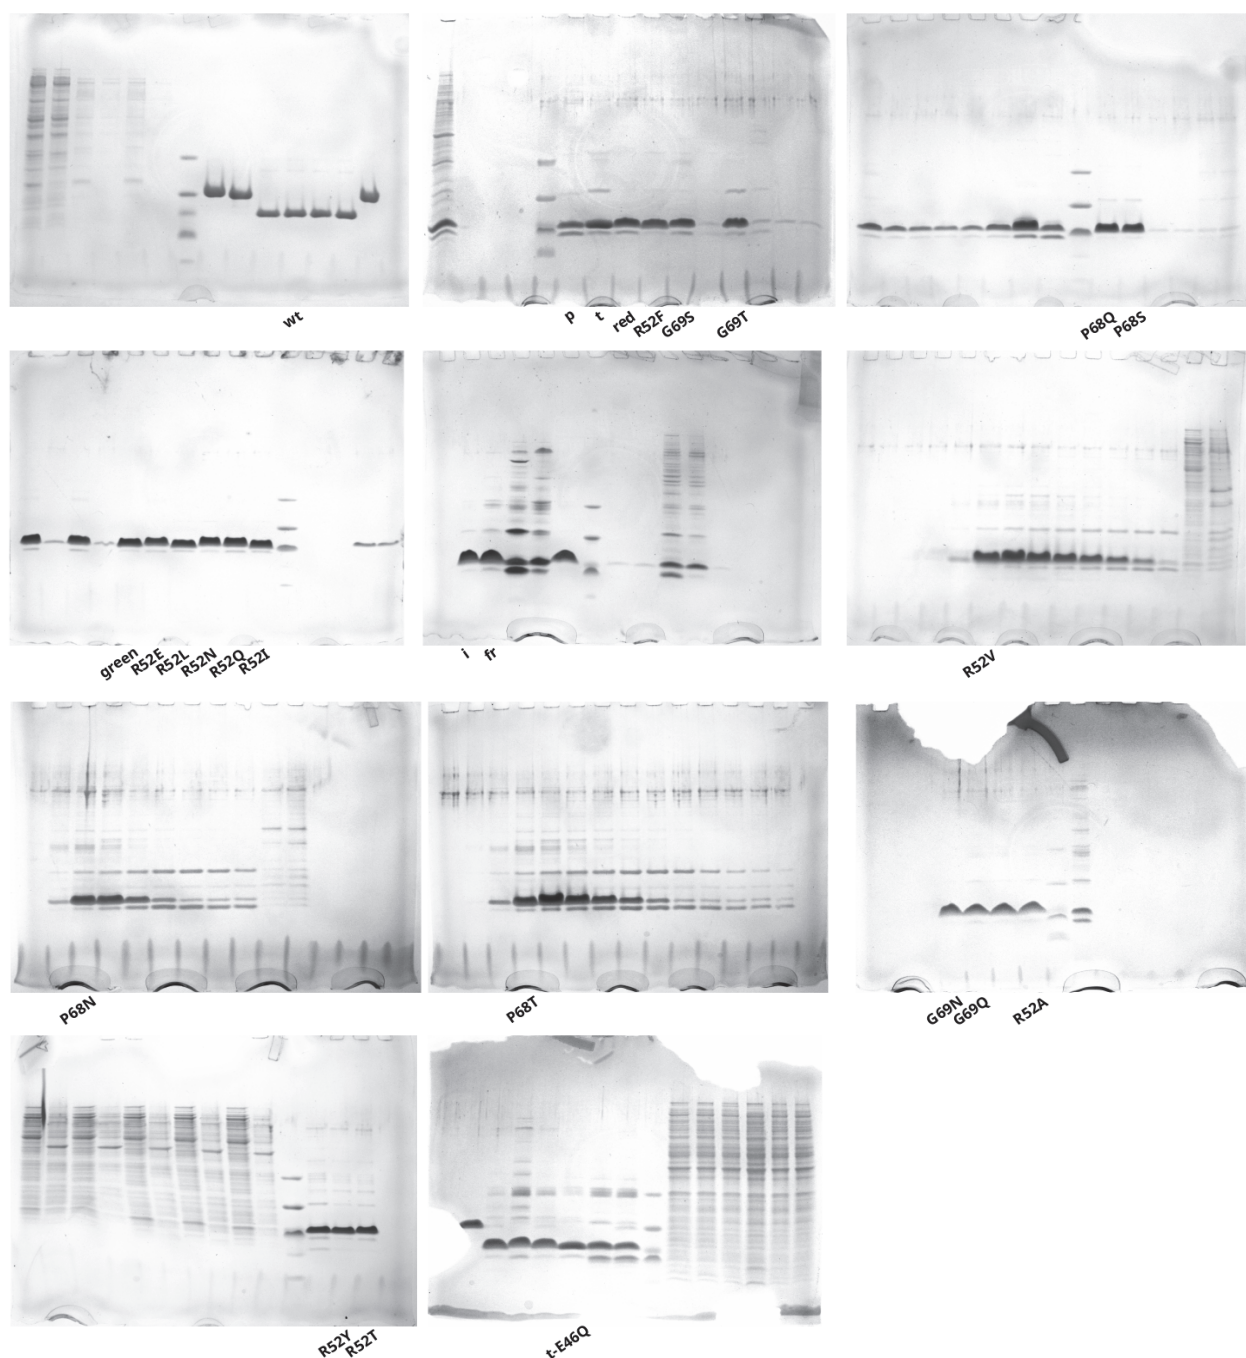

**Figure S1.2.** The full-sized raw Tris-Tricine-SDS-PAGEs for purified nanoFAST and its mutant variants. The protein samples shown at Fig S1.1 are signed identically (for designations and sequences see **Table S1.1**). Protein molecular weight markers: 26.6 kDa, 17 kDa, 14.2 kDa, 6.5 kDa, 3.5 kDa. Molecular weight of the wild type nanoFAST (wt) is 11.9 kDa. The raw gels were combined with inscriptions using Inkscape 0.92 (<https://www.inkscape.org>).

**Table S1.1** Aminoacid sequences of the synthesized mutants and yields (in mg of purified protein per liter of minimal salts medium, M9). Mutated residues are shown in bold. Here and after aminoacids numbering correspond to the parent FAST (as well as PYP) protein.

| mutant                                                                       | Designation<br>(Figures S1)                                       | Yield, mg/l M9                                                                         | sequence                                                                                                                                                   |
|------------------------------------------------------------------------------|-------------------------------------------------------------------|----------------------------------------------------------------------------------------|------------------------------------------------------------------------------------------------------------------------------------------------------------|
| <b>nanoFAST</b>                                                              | <b>wt</b>                                                         | ~ 1.9                                                                                  | (M)FGAIQLDGDGNILQYNAAEGDITGRDPKQVIGKNFFKD<br>VAPGTDSPEFYGKFKEGVASGNLNTMFEWMIPTSRGPTKV<br>KVHMKKALSGDSYWVFVKRV                                              |
| <b>nano-iFAST</b><br>(V107I)                                                 | <b>i</b>                                                          | ~ 2.1                                                                                  | (M)FGAIQLDGDGNILQYNAAEGDITGRDPKQVIGKNFFKD<br>VAPGTDSPEFYGKFKEGVASGNLNTMFEWMIPTSRGPTKV<br>KIHMKKALSGDSYWVFVKRV                                              |
| <b>nano-greenFAST</b><br>(P68T, G77R)                                        | <b>green</b>                                                      | ~ 1.6                                                                                  | (M)FGAIQLDGDGNILQYNAAEGDITGRDPKQVIGKNFFKD<br>VATGTDSPEFYGKFKEGVASGNLNTMFEWMIPTSRGPTKV<br>KVHMKKALSGDSYWVFVKRV                                              |
| <b>nano-redFAST</b><br>(F28L E46Q)                                           | <b>red</b>                                                        | ~ 1.5                                                                                  | (M)LGAIQLDGDGNILQYNAA <b>Q</b> GDITGADPKQVIGKNFFKD<br>VAPGTDSPEFYGKFVGVASGNLNTMFEWMIPTNRGPTKV<br>KVHMKKALSGDSYWVFVKRV                                      |
| <b>nano-frFAST</b><br>(F62L, D71V, P73S,<br>E74G, V107I)                     | <b>fr</b>                                                         | ~ 0.7                                                                                  | (M)FGAIQLDGDGNILQYNAAEGDITGRDPKQVIGKN <b>L</b> FKD<br>VAPGT <b>V</b> SSGFYGKFKEGVASGNLNTMFEWMIPTSRGPTKV<br>KIHMKKALSGDSYWVFVKRV                            |
| <b>nano-pFAST</b><br>(A30V, Q41L, S72T,<br>V83A, M95T,<br>M109L, S117R)      | <b>p</b>                                                          | ~ 0.2                                                                                  | (M)FGVIQLDGDGNIL <b>L</b> YNAAEGDITGRDPKQVIGKNFFKD<br>VAPGTDTPEFYGKFKEGAASGNLNTMFEW <b>T</b> IPTSRGPTKV<br>KVH <b>L</b> KKALSGD <b>R</b> YWVFVKRV          |
| <b>nano-tFAST</b><br>(Q41K, S72T, A84S,<br>M95A, M109L,<br>S117R)            | <b>t</b>                                                          | ~ 1.5                                                                                  | (M)FGAIQLDGDGNIL <b>K</b> YNAAEGDITGRDPKQVIGKNFFKD<br>VAPGTDTPEFYGKFKEGVSSGNLNTMFEW <b>A</b> IPTSRGPTKV<br>KVH <b>L</b> KKALSGD <b>R</b> YWVFVKRV          |
| <b>nanoFAST-R52X</b><br>(X = A, E, L, V, I, Q,<br>N, T, Y, F)                | <b>R52X</b><br>X = A<br>E<br>L<br>V<br>I<br>Q<br>N<br>T<br>Y<br>F | ~ 1.4<br>~ 2.5<br>~ 1.8<br>~ 2.0<br>~ 1.8<br>~ 1.7<br>~ 2.5<br>~ 2.6<br>~ 2.7<br>~ 2.4 | (M)FGAIQLDGDGNILQYNAAEGDITG <b>X</b> DPKQVIGKNFFKD<br>VAPGTDSPEFYGKFKEGVASGNLNTMFEWMIPTSRGPTKV<br>KVHMKKALSGDSYWVFVKRV                                     |
| <b>nanoFAST-G69X</b><br>(X = S, T, N, Q)                                     | <b>G69X</b><br>X = S<br>T<br>N<br>Q                               | ~ 3.2<br>~ 1.9<br>~ 1.4<br>~ 1.9                                                       | (M)FGAIQLDGDGNILQYNAAEGDITGRDPKQVIGKNFFKD<br>VAP <b>X</b> TDSPEFYGKFKEGVASGNLNTMFEWMIPTSRGPTKV<br>KVHMKKALSGDSYWVFVKRV                                     |
| <b>nanoFAST-P68X</b><br>(X = S, T, N, Q)                                     | <b>P68X</b><br>X = S<br>T<br>N<br>Q                               | ~ 2.1<br>~ 2.1<br>~ 1.7<br>~ 1.8                                                       | (M)FGAIQLDGDGNILQYNAAEGDITGRDPKQVIGKNFFKD<br>V <b>A</b> XGTDSPEFYGKFKEGVASGNLNTMFEWMIPTSRGPTKV<br>KVHMKKALSGDSYWVFVKRV                                     |
| <b>nano-tFAST-E46Q</b><br>(Q41K, S72T, A84S,<br>M95A, M109L,<br>S117R, E46Q) | <b>t-E46Q</b>                                                     | ~ 1.4                                                                                  | (M)FGAIQLDGDGNIL <b>K</b> YNAA <b>Q</b> GDITGRDPKQVIGKNFFKD<br>VAPGTDTPEFYGKFKEGVSSGNLNTMFEW <b>A</b> IPTSRGPTKV<br>KVH <b>L</b> KKALSGD <b>R</b> YWVFVKRV |



## 2. Screening in vitro

**Table S2.1.** Structure of chromophores and their optical properties

| Cmpd              | Structure                                                                           | Abs <sup>a</sup> | Em <sup>a</sup>   | Cmpd          | Structure                                                                             | Abs <sup>a</sup> | Em <sup>a</sup> |
|-------------------|-------------------------------------------------------------------------------------|------------------|-------------------|---------------|---------------------------------------------------------------------------------------|------------------|-----------------|
| <b>HBR-DOM2</b>   | 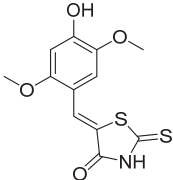   | ~420             | ~500              | <b>M 2766</b> |    | 451              | 552             |
| <b>HBR-2,5-DM</b> |    | 397 <sup>b</sup> | ~475 <sup>b</sup> | <b>ZS 362</b> |    | 389              | 456             |
| <b>HMBR</b>       |    | 400              | 493               | <b>N 1179</b> |    | 368              | ~400            |
| <b>HBR-DOM</b>    |   | 406              | 530               | <b>N 1180</b> |   | 367              | - <sup>c</sup>  |
| <b>N 871b</b>     |  | 455              | 570               | <b>N 1204</b> |  | 438              | 550             |
| <b>MID 145</b>    |  | 449              | 531               | <b>N 1206</b> |  | 470              | - <sup>c</sup>  |
| <b>N 1052</b>     |  | 478              | 575               | <b>ZS 309</b> |   | 453              | 583             |
| <b>N 1184</b>     |  | 444              | 545               | <b>ZS 316</b> |  | 446              | 550             |
| <b>N 1122</b>     |  | 436              | 507               | <b>ZS 319</b> |  | 413              | 615             |

|                |                                                                                     |                  |                  |                |                                                                                       |                  |                |
|----------------|-------------------------------------------------------------------------------------|------------------|------------------|----------------|---------------------------------------------------------------------------------------|------------------|----------------|
| <b>N 1049</b>  | 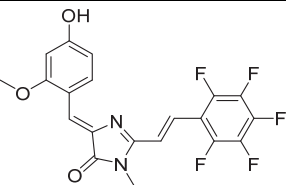   | 453              | 570              | <b>ZS 325</b>  |    | 393              | - <sup>c</sup> |
| <b>N 1123</b>  |    | 478              | 545              | <b>MID 213</b> |     | 460              | 640            |
| <b>N 1139</b>  |    | 469              | 597              | <b>M 2767</b>  |     | 488              | 630            |
| <b>N 1118</b>  |    | 440              | 509              | <b>M 2876</b>  |    | 380              | ~400           |
| <b>SAI 112</b> |   | 384 <sup>b</sup> | 445 <sup>b</sup> | <b>SH 16</b>   |   | 432              | ~510           |
| <b>N 1135</b>  |  | 394              | 460              | <b>SAI 472</b> |  | 412              | ~550           |
| <b>SAI 118</b> |  | 382 <sup>b</sup> | 445 <sup>b</sup> | <b>SAI 499</b> |  | 399              | ~500           |
| <b>N 1124</b>  |  | 447              | 557              | <b>SAI 503</b> |  | 366              | ~500           |
| <b>SAI 122</b> |  | 386 <sup>b</sup> | 446 <sup>b</sup> | <b>SAI 474</b> |  | 364 <sup>b</sup> | - <sup>c</sup> |

|                |                                                                                     |                  |                  |                |                                                                                       |                  |                   |
|----------------|-------------------------------------------------------------------------------------|------------------|------------------|----------------|---------------------------------------------------------------------------------------|------------------|-------------------|
| <b>N 1142</b>  | 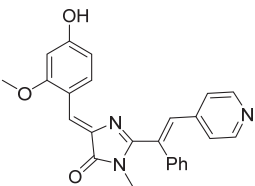   | 429              | - <sup>c</sup>   | <b>SAI 477</b> |    | 384 <sup>b</sup> | ~480 <sup>b</sup> |
| <b>SAI 199</b> |    | 387 <sup>b</sup> | 448 <sup>b</sup> | <b>N 1196</b>  |    | 450 <sup>b</sup> | 604 <sup>b</sup>  |
| <b>N 967</b>   |    | 443              | 600              | <b>N 1197</b>  |    | 454 <sup>b</sup> | 590 <sup>b</sup>  |
| <b>N 1039</b>  |    | 453              | 545              | <b>SAI 127</b> |    | 383 <sup>b</sup> | 448 <sup>b</sup>  |
| <b>N 1202</b>  |   | 422              | - <sup>c</sup>   | <b>N 1056</b>  |   | 478              | 590               |
| <b>N 960b</b>  |  | 449              | 596              | <b>N 1068</b>  |  | 453              | 539               |
| <b>N 1036</b>  |  | 410              | 520              | <b>N 1069</b>  |  | 469              | 571               |
| <b>SAI 117</b> |  | 387 <sup>b</sup> | 445 <sup>b</sup> | <b>A9</b>      |  | 430              | 545               |
| <b>N 1042</b>  |  | 381              | 440              | <b>N 1198</b>  |  | 463 <sup>b</sup> | ~580 <sup>b</sup> |
| <b>SAI 121</b> |  | 386 <sup>b</sup> | 443 <sup>b</sup> | <b>N 1193</b>  |  | 448              | 565               |

|                |  |                  |                   |                |  |                  |                   |
|----------------|--|------------------|-------------------|----------------|--|------------------|-------------------|
| <b>MID 147</b> |  | 493              | 635               | <b>N 1199</b>  |  | 458 <sup>b</sup> | ~560 <sup>b</sup> |
| <b>SAI 125</b> |  | 386 <sup>b</sup> | 445 <sup>b</sup>  | <b>SAI 363</b> |  | 410 <sup>b</sup> | ~470 <sup>b</sup> |
| <b>MID 151</b> |  | 488              | - <sup>c</sup>    | <b>SAI 366</b> |  | 403 <sup>b</sup> | ~480 <sup>b</sup> |
| <b>N 865</b>   |  | 389              | 466               | <b>SAI 362</b> |  | 460 <sup>b</sup> | ~475 <sup>b</sup> |
| <b>MID 153</b> |  | 515              | - <sup>c</sup>    | <b>SAI 365</b> |  | 403 <sup>b</sup> | ~480 <sup>b</sup> |
| <b>MID 343</b> |  | 531 <sup>d</sup> | 595 <sup>d</sup>  | <b>SAI 120</b> |  | 390 <sup>b</sup> | 447 <sup>b</sup>  |
| <b>M 3007a</b> |  | 490 <sup>d</sup> | ~550 <sup>d</sup> | <b>SAI 458</b> |  | 393 <sup>b</sup> | - <sup>c</sup>    |
| <b>MID 367</b> |  | 529 <sup>d</sup> | 585 <sup>d</sup>  | <b>SAI 459</b> |  | 359 <sup>b</sup> | - <sup>c</sup>    |
| <b>N 1048</b>  |  | 485              | 615               | <b>SAI 487</b> |  | 352              | ~450              |
| <b>N 979</b>   |  | 383              | 485               | <b>N 1131</b>  |  | 411              | 492               |

|               |  |     |                |                |  |                  |                   |
|---------------|--|-----|----------------|----------------|--|------------------|-------------------|
| <b>N 971</b>  |  | 453 | 567            | <b>MID 323</b> |  | 504              | 555               |
| <b>N 973</b>  |  | 453 | 576            | <b>SAI 379</b> |  | 388              | ~500              |
| <b>N 976</b>  |  | 393 | 485            | <b>SAI 367</b> |  | 402 <sup>b</sup> | ~570 <sup>b</sup> |
| <b>N 980</b>  |  | 468 | - <sup>c</sup> | <b>M 2738d</b> |  | 441              | ~550              |
| <b>N 1205</b> |  | 438 | 555            | <b>ZS 260</b>  |  | 430              | 606               |
| <b>N 960a</b> |  | 437 | - <sup>c</sup> | <b>N 871a</b>  |  | 483              | 555               |
| <b>ZS 331</b> |  | 473 | 600            | <b>N 901</b>   |  | 430              | 542               |
| <b>N 1027</b> |  | 382 | 450            |                |  |                  |                   |

a – maxima position in nm;

b – in acetonitrile (non soluble enough in water);

c – non fluorescent;

d – in methanol (non soluble enough in water).

**Table S2.2.** Results of interaction with nanoFAST

| <b>Cmpd</b>       | <b>Enhancement</b> |            |            |            |
|-------------------|--------------------|------------|------------|------------|
|                   | <b>430</b>         | <b>480</b> | <b>530</b> | <b>580</b> |
| <b>HBR-DOM2</b>   | 20.5               | >164.6     | >265.6     | 3.3        |
| <b>HBR-2,5-DM</b> | 7.4                | 37.2       | 8.3        | 1.2        |
| <b>HMBR</b>       | 2.5                | 5.7        | 1.2        | 1.5        |
| <b>HBR-DOM</b>    | 1.3                | 2.9        | 6.4        | 2.3        |
| <b>N 871b</b>     | 1.1                | 1.4        | 2.3        | 2.9        |
| <b>MID 145</b>    | 1.2                | 1.4        | 1.9        | 0.9        |
| <b>N 1052</b>     | 1.2                | 1.3        | 1.5        | 1.8        |
| <b>N 1184</b>     | 1.2                | 1.6        | 2.4        | 1.8        |
| <b>N 1122</b>     | 1.2                | 1.2        | 1.1        | 1.4        |
| <b>N 1049</b>     | 1.1                | 1.2        | 1.4        | 1.8        |
| <b>N 1123</b>     | 1.1                | 1.1        | 1.2        | 1.3        |
| <b>N 1139</b>     | 1.1                | 1.2        | 2.6        | 5.2        |
| <b>N 1118</b>     | 1.2                | 1.3        | 1.2        | 1.2        |
| <b>SAI 112</b>    | 3.0                | 7.4        | 2.2        | 1.0        |
| <b>N 1135</b>     | 1.1                | 1.0        | 1.1        | 1.3        |
| <b>SAI 118</b>    | 1.7                | 2.0        | 1.2        | 1.0        |
| <b>N 1124</b>     | 1.1                | 1.1        | 1.2        | 1.0        |
| <b>SAI 122</b>    | 6.4                | 7.1        | 1.4        | 1.2        |
| <b>N 1142</b>     | 1.1                | 1.1        | 1.2        | 1.1        |
| <b>SAI 199</b>    | 7.3                | 7.5        | 1.1        | 0.9        |
| <b>N 967</b>      | 1.1                | 1.1        | 1.2        | 1.5        |
| <b>N 1039</b>     | 1.2                | 1.7        | 2.8        | 2.3        |
| <b>N 1202</b>     | 1.2                | 1.5        | 2.5        | 2.5        |
| <b>N 960b</b>     | 1.1                | 1.2        | 1.7        | 2.9        |
| <b>N 1036</b>     | 1.1                | 1.1        | 1.1        | 1.0        |
| <b>SAI 117</b>    | 2.2                | 2.3        | 1.2        | 1.0        |
| <b>N 1042</b>     | 1.1                | 1.0        | 1.0        | 1.0        |
| <b>SAI 121</b>    | 2.2                | 2.8        | 1.2        | 0.9        |
| <b>MID 147</b>    | 1.5                | 2.2        | 3.4        | 3.2        |
| <b>SAI 125</b>    | 3.6                | 6.1        | 1.2        | 0.9        |
| <b>MID 151</b>    | 1.1                | 1.1        | 1.2        | 1.5        |
| <b>N 865</b>      | 1.1                | 1.0        | 1.1        | 1.1        |
| <b>MID 153</b>    | 1.1                | 1.1        | 1.2        | 1.4        |
| <b>MID 343</b>    | 1.1                | 1.2        | 1.8        | 3.5        |
| <b>M 3007a</b>    | 1.1                | 1.1        | 1.3        | 1.2        |
| <b>MID 367</b>    | 1.1                | 1.1        | 1.2        | 1.6        |
| <b>N 1048</b>     | 1.2                | 1.4        | 2.8        | 4.7        |
| <b>N 979</b>      | 1.1                | 1.0        | 1.0        | 0.9        |
| <b>N 971</b>      | 1.1                | 1.0        | 1.0        | 1.0        |
| <b>N 973</b>      | 1.1                | 1.1        | 1.1        | 1.2        |
| <b>N 976</b>      | 1.1                | 1.1        | 1.0        | 1.0        |
| <b>N 980</b>      | 1.1                | 1.0        | 1.1        | 1.1        |
| <b>N 1205</b>     | 1.6                | 2.4        | 3.9        | 3.4        |
| <b>N 960a</b>     | 1.1                | 1.1        | 1.2        | 1.1        |

|                |      |       |     |     |
|----------------|------|-------|-----|-----|
| <b>ZS 331</b>  | 1.2  | 1.3   | 1.6 | 2.1 |
| <b>N 1027</b>  | 1.1  | 1.0   | 1.0 | 1.0 |
| <b>M 2766</b>  | 1.1  | 1.5   | 2.4 | 2.1 |
| <b>ZS 362</b>  | 1.1  | 1.0   | 1.0 | 1.3 |
| <b>N 1179</b>  | 1.0  | 1.1   | 1.0 | 1.0 |
| <b>N 1180</b>  | 1.0  | 1.1   | 1.1 | 1.2 |
| <b>N 1204</b>  | 1.3  | 1.9   | 2.7 | 1.8 |
| <b>N 1206</b>  | 1.2  | 1.6   | 2.3 | 1.8 |
| <b>ZS 309</b>  | 1.2  | 1.5   | 2.2 | 1.3 |
| <b>ZS 316</b>  | 1.1  | 1.1   | 1.0 | 0.9 |
| <b>ZS 319</b>  | 1.0  | 1.0   | 1.1 | 1.1 |
| <b>ZS 325</b>  | 1.1  | 1.0   | 1.0 | 1.4 |
| <b>MID 213</b> | 1.1  | 1.1   | 1.1 | 1.1 |
| <b>M 2767</b>  | 1.2  | 1.7   | 2.7 | 3.7 |
| <b>M 2876</b>  | 1.1  | 1.0   | 1.0 | 1.3 |
| <b>SH 16</b>   | 1.1  | 1.2   | 1.2 | 0.9 |
| <b>SAI 472</b> | 1.4  | 1.9   | 1.5 | 1.1 |
| <b>SAI 499</b> | 1.1  | 1.1   | 1.0 | 1.1 |
| <b>SAI 503</b> | 1.0  | 1.0   | 1.0 | 1.2 |
| <b>SAI 474</b> | 1.4  | 1.0   | 1.0 | 1.1 |
| <b>SAI 477</b> | 10.7 | 4.2   | 1.0 | 0.9 |
| <b>N 1196</b>  | 1.0  | 1.0   | 1.0 | 1.0 |
| <b>N 1197</b>  | 1.0  | 1.0   | 1.1 | 1.2 |
| <b>SAI 127</b> | 3.9  | 8.8   | 1.7 | 0.9 |
| <b>N 1056</b>  | 1.0  | 1.0   | 1.2 | 1.5 |
| <b>N 1068</b>  | 1.1  | 1.0   | 1.1 | 1.0 |
| <b>N 1069</b>  | 1.0  | 1.1   | 1.2 | 1.3 |
| <b>A9</b>      | 1.1  | 1.0   | 1.0 | 1.1 |
| <b>N 1198</b>  | 1.0  | 1.0   | 1.0 | 0.9 |
| <b>N 1193</b>  | 1.9  | 2.6   | 2.4 | 2.6 |
| <b>N 1199</b>  | 1.1  | 1.3   | 1.7 | 1.2 |
| <b>SAI 363</b> | 5.0  | 11.2  | 1.2 | 1.0 |
| <b>SAI 366</b> | 19.8 | >60.7 | 3.6 | 1.1 |
| <b>SAI 362</b> | 14.6 | 48.6  | 2.4 | 0.9 |
| <b>SAI 365</b> | 16.8 | 50.0  | 4.1 | 0.9 |
| <b>SAI 120</b> | 1.1  | 1.0   | 1.0 | 1.0 |
| <b>SAI 458</b> | 3.0  | 6.7   | 1.1 | 1.0 |
| <b>SAI 459</b> | 1.0  | 1.0   | 1.0 | 0.9 |
| <b>SAI 487</b> | 1.0  | 1.0   | 1.0 | 1.0 |
| <b>N 1131</b>  | 1.1  | 1.1   | 1.0 | 1.1 |
| <b>MID 323</b> | 1.1  | 1.1   | 1.3 | 1.4 |
| <b>SAI 379</b> | 1.7  | 1.8   | 1.1 | 1.0 |
| <b>SAI 367</b> | 1.1  | 1.1   | 1.0 | 0.9 |
| <b>M 2738d</b> | 1.1  | 1.8   | 2.3 | 0.8 |
| <b>ZS 260</b>  | 1.6  | 2.5   | 2.4 | 1.3 |
| <b>N 871a</b>  | 1.4  | 2.2   | 3.0 | 2.3 |
| <b>N 901</b>   | 1.0  | 1.1   | 1.3 | 1.4 |



**Table S2.3.** Results of interaction with nano-iFAST

| <b>Cmpd</b>       | <b>Enhancement</b> |            |            |            |
|-------------------|--------------------|------------|------------|------------|
|                   | <b>430</b>         | <b>480</b> | <b>530</b> | <b>580</b> |
| <b>HBR-DOM2</b>   | 19.9               | 141.1      | 213.5      | 1.8        |
| <b>HBR-2,5-DM</b> | 15.6               | 83.0       | 20.0       | 0.9        |
| <b>HMBR</b>       | 4.6                | 12.7       | 1.6        | 1.0        |
| <b>HBR-DOM</b>    | 1.5                | 4.1        | 9.6        | 1.7        |
| <b>N 871b</b>     | 1.1                | 1.3        | 1.7        | 1.7        |
| <b>MID 145</b>    | 1.2                | 1.4        | 1.8        | 1.1        |
| <b>N 1052</b>     | 1.2                | 1.4        | 1.7        | 1.6        |
| <b>N 1184</b>     | 1.1                | 1.4        | 1.8        | 1.1        |
| <b>N 1122</b>     | 1.2                | 1.3        | 1.1        | 1.2        |
| <b>N 1049</b>     | 1.1                | 1.2        | 1.4        | 1.4        |
| <b>N 1123</b>     | 1.1                | 1.1        | 1.1        | 1.1        |
| <b>N 1139</b>     | 1.1                | 1.3        | 3.0        | 4.1        |
| <b>N 1118</b>     | 1.2                | 1.3        | 1.2        | 1.1        |
| <b>SAI 112</b>    | 4.7                | 13.2       | 2.3        | 0.9        |
| <b>N 1135</b>     | 1.1                | 1.0        | 1.0        | 1.0        |
| <b>SAI 118</b>    | 2.5                | 3.1        | 1.4        | 1.0        |
| <b>N 1124</b>     | 1.1                | 1.1        | 1.2        | 1.1        |
| <b>SAI 122</b>    | 7.1                | 7.9        | 1.4        | 1.2        |
| <b>N 1142</b>     | 1.1                | 1.1        | 1.3        | 1.0        |
| <b>SAI 199</b>    | 8.6                | 9.1        | 1.1        | 1.0        |
| <b>N 967</b>      | 1.1                | 1.1        | 1.1        | 1.2        |
| <b>N 1039</b>     | 1.2                | 1.5        | 2.3        | 1.6        |
| <b>N 1202</b>     | 1.1                | 1.3        | 1.8        | 1.6        |
| <b>N 960b</b>     | 1.1                | 1.2        | 1.7        | 2.3        |
| <b>N 1036</b>     | 1.1                | 1.1        | 1.0        | 1.0        |
| <b>SAI 117</b>    | 4.4                | 7.7        | 1.3        | 1.0        |
| <b>N 1042</b>     | 1.1                | 1.0        | 1.0        | 1.0        |
| <b>SAI 121</b>    | 3.4                | 4.3        | 1.2        | 1.1        |
| <b>MID 147</b>    | 1.5                | 2.1        | 3.0        | 2.1        |
| <b>SAI 125</b>    | 6.3                | 10.8       | 1.2        | 1.1        |
| <b>MID 151</b>    | 1.1                | 1.1        | 1.2        | 1.2        |
| <b>N 865</b>      | 1.1                | 1.0        | 1.1        | 1.1        |
| <b>MID 153</b>    | 1.1                | 1.1        | 1.3        | 1.3        |
| <b>MID 343</b>    | 1.1                | 1.2        | 2.4        | 3.9        |
| <b>M 3007a</b>    | 1.1                | 1.1        | 1.3        | 1.1        |
| <b>MID 367</b>    | 1.1                | 1.1        | 1.2        | 1.3        |
| <b>N 1048</b>     | 1.1                | 1.2        | 1.7        | 1.9        |
| <b>N 979</b>      | 1.1                | 1.0        | 0.9        | 1.0        |
| <b>N 971</b>      | 1.1                | 1.0        | 1.1        | 1.1        |
| <b>N 973</b>      | 1.0                | 1.1        | 1.1        | 1.2        |
| <b>N 976</b>      | 1.1                | 1.1        | 1.0        | 1.0        |
| <b>N 980</b>      | 1.1                | 1.0        | 1.1        | 1.1        |
| <b>N 1205</b>     | 1.7                | 3.6        | 7.8        | 3.1        |
| <b>N 960a</b>     | 1.1                | 1.1        | 1.1        | 1.0        |

|                |      |       |     |     |
|----------------|------|-------|-----|-----|
| <b>ZS 331</b>  | 1.1  | 1.2   | 1.5 | 1.5 |
| <b>N 1027</b>  | 1.1  | 1.0   | 1.0 | 1.0 |
| <b>M 2766</b>  | 1.1  | 1.3   | 1.9 | 1.6 |
| <b>ZS 362</b>  | 1.1  | 1.0   | 1.0 | 0.9 |
| <b>N 1179</b>  | 1.1  | 1.1   | 1.1 | 1.0 |
| <b>N 1180</b>  | 1.1  | 1.0   | 1.1 | 0.9 |
| <b>N 1204</b>  | 1.5  | 3.0   | 6.1 | 2.8 |
| <b>N 1206</b>  | 1.0  | 1.1   | 1.3 | 1.3 |
| <b>ZS 309</b>  | 1.2  | 1.8   | 3.1 | 2.3 |
| <b>ZS 316</b>  | 1.1  | 1.0   | 1.0 | 1.0 |
| <b>ZS 319</b>  | 1.0  | 1.0   | 1.0 | 1.1 |
| <b>ZS 325</b>  | 1.1  | 1.0   | 1.1 | 1.0 |
| <b>MID 213</b> | 1.1  | 1.1   | 1.1 | 1.1 |
| <b>M 2767</b>  | 1.1  | 1.2   | 1.4 | 1.7 |
| <b>M 2876</b>  | 1.1  | 1.1   | 1.0 | 1.0 |
| <b>SH 16</b>   | 1.1  | 1.1   | 1.2 | 1.0 |
| <b>SAI 472</b> | 1.2  | 1.0   | 1.0 | 1.0 |
| <b>SAI 499</b> | 1.2  | 1.4   | 1.2 | 1.2 |
| <b>SAI 503</b> | 1.0  | 1.0   | 1.0 | 1.1 |
| <b>SAI 474</b> | 1.1  | 1.0   | 1.0 | 0.9 |
| <b>SAI 477</b> | 1.3  | 1.0   | 1.0 | 1.0 |
| <b>N 1196</b>  | 5.2  | 2.5   | 1.0 | 1.1 |
| <b>N 1197</b>  | 1.0  | 1.0   | 1.1 | 1.1 |
| <b>SAI 127</b> | 1.1  | 1.0   | 1.1 | 1.1 |
| <b>N 1056</b>  | 1.0  | 1.0   | 1.1 | 1.2 |
| <b>N 1068</b>  | 1.0  | 1.0   | 1.1 | 1.1 |
| <b>N 1069</b>  | 1.0  | 1.2   | 1.3 | 1.1 |
| <b>A9</b>      | 1.0  | 1.0   | 1.0 | 1.0 |
| <b>N 1198</b>  | 1.0  | 1.0   | 1.1 | 1.1 |
| <b>N 1193</b>  | 1.7  | 2.4   | 2.4 | 2.6 |
| <b>N 1199</b>  | 1.1  | 1.4   | 1.9 | 1.3 |
| <b>SAI 363</b> | 4.2  | 10.4  | 1.2 | 1.1 |
| <b>SAI 366</b> | 25.6 | >79.6 | 4.4 | 1.0 |
| <b>SAI 362</b> | 11.5 | 41.3  | 2.4 | 1.0 |
| <b>SAI 365</b> | 25.0 | >75.1 | 5.6 | 1.0 |
| <b>SAI 120</b> | 1.1  | 1.1   | 1.1 | 1.0 |
| <b>SAI 458</b> | 5.0  | 14.6  | 1.3 | 1.0 |
| <b>SAI 459</b> | 1.0  | 1.0   | 1.0 | 1.1 |
| <b>SAI 487</b> | 1.0  | 1.0   | 1.0 | 0.9 |
| <b>N 1131</b>  | 1.1  | 1.1   | 1.1 | 1.0 |
| <b>MID 323</b> | 1.1  | 1.1   | 1.4 | 1.8 |
| <b>SAI 379</b> | 2.3  | 2.3   | 1.1 | 1.1 |
| <b>SAI 367</b> | 1.5  | 1.3   | 1.1 | 1.1 |
| <b>M 2738d</b> | 1.1  | 1.5   | 2.0 | 1.2 |
| <b>ZS 260</b>  | 2.0  | 3.7   | 4.3 | 1.8 |
| <b>N 871a</b>  | 1.7  | 3.1   | 4.9 | 2.7 |
| <b>N 901</b>   | 1.1  | 1.2   | 1.5 | 1.9 |

**Table S2.4.** Results of interaction with nano-frFAST

| <b>Cmpd</b>       | <b>Enhancement</b> |            |            |            |
|-------------------|--------------------|------------|------------|------------|
|                   | <b>430</b>         | <b>480</b> | <b>530</b> | <b>580</b> |
| <b>HBR-DOM2</b>   | 2.9                | 15.9       | 22.9       | 1.6        |
| <b>HBR-2,5-DM</b> | 3.0                | 12.8       | 5.4        | 1.2        |
| <b>HMBR</b>       | 2.6                | 5.8        | 1.8        | 1.3        |
| <b>HBR-DOM</b>    | 4.3                | 28.2       | 63.4       | 15.1       |
| <b>N 871b</b>     | 1.2                | 1.5        | 2.0        | 2.6        |
| <b>MID 145</b>    | 1.3                | 2.1        | 4.5        | 2.0        |
| <b>N 1052</b>     | 1.7                | 3.4        | 8.3        | 14.1       |
| <b>N 1184</b>     | 1.2                | 1.4        | 1.7        | 2.6        |
| <b>N 1122</b>     | 1.2                | 1.5        | 1.5        | 1.3        |
| <b>N 1049</b>     | 1.3                | 2.0        | 5.7        | 13.0       |
| <b>N 1123</b>     | 1.2                | 1.2        | 1.4        | 1.6        |
| <b>N 1139</b>     | 1.5                | 7.4        | 39.7       | 51.1       |
| <b>N 1118</b>     | 1.3                | 1.6        | 2.5        | 2.4        |
| <b>SAI 112</b>    | 2.7                | 7.0        | 3.5        | 1.6        |
| <b>N 1135</b>     | 1.2                | 1.2        | 1.8        | 3.0        |
| <b>SAI 118</b>    | 1.5                | 1.8        | 1.5        | 1.6        |
| <b>N 1124</b>     | 1.4                | 3.7        | 7.2        | 4.6        |
| <b>SAI 122</b>    | 2.4                | 2.8        | 1.5        | 1.5        |
| <b>N 1142</b>     | 2.3                | 9.9        | 28.3       | 19.5       |
| <b>SAI 199</b>    | 2.8                | 3.0        | 1.2        | 1.2        |
| <b>N 967</b>      | 1.3                | 2.2        | 8.0        | 26.5       |
| <b>N 1039</b>     | 1.6                | 3.7        | 8.9        | 7.4        |
| <b>N 1202</b>     | 1.2                | 1.3        | 1.6        | 2.3        |
| <b>N 960b</b>     | 1.2                | 1.9        | 5.9        | 15.9       |
| <b>N 1036</b>     | 1.1                | 1.2        | 1.2        | 1.1        |
| <b>SAI 117</b>    | 2.0                | 3.3        | 1.4        | 1.0        |
| <b>N 1042</b>     | 1.2                | 1.1        | 1.2        | 1.3        |
| <b>SAI 121</b>    | 1.9                | 2.4        | 1.5        | 1.3        |
| <b>MID 147</b>    | 2.6                | 6.2        | 12.4       | 17.4       |
| <b>SAI 125</b>    | 2.0                | 3.1        | 1.3        | 1.5        |
| <b>MID 151</b>    | 1.3                | 1.9        | 5.9        | 12.3       |
| <b>N 865</b>      | 1.2                | 1.1        | 1.2        | 1.3        |
| <b>MID 153</b>    | 1.3                | 1.5        | 4.9        | 15.1       |
| <b>MID 343</b>    | 1.2                | 1.5        | 3.5        | 12.1       |
| <b>M 3007a</b>    | 1.2                | 1.3        | 1.6        | 2.3        |
| <b>MID 367</b>    | 1.2                | 1.2        | 1.7        | 4.6        |
| <b>N 1048</b>     | 1.5                | 2.7        | 10.2       | 18.8       |
| <b>N 979</b>      | 1.2                | 1.2        | 1.2        | 1.6        |
| <b>N 971</b>      | 1.2                | 1.3        | 2.6        | 6.7        |
| <b>N 973</b>      | 1.3                | 1.4        | 2.1        | 2.9        |
| <b>N 976</b>      | 1.2                | 1.1        | 1.2        | 1.3        |
| <b>N 980</b>      | 1.1                | 1.1        | 1.4        | 4.6        |
| <b>N 1205</b>     | 1.8                | 3.4        | 5.4        | 5.5        |
| <b>N 960a</b>     | 1.2                | 1.2        | 2.8        | 18.9       |

|                |     |     |      |      |
|----------------|-----|-----|------|------|
| <b>ZS 331</b>  | 1.4 | 2.5 | 6.5  | 12.3 |
| <b>N 1027</b>  | 1.2 | 1.1 | 1.1  | 1.1  |
| <b>M 2766</b>  | 1.3 | 1.8 | 2.9  | 4.2  |
| <b>ZS 362</b>  | 1.2 | 1.1 | 1.2  | 1.2  |
| <b>N 1179</b>  | 1.2 | 1.2 | 1.3  | 1.1  |
| <b>N 1180</b>  | 1.2 | 1.2 | 1.3  | 1.2  |
| <b>N 1204</b>  | 1.6 | 2.7 | 3.9  | 2.4  |
| <b>N 1206</b>  | 1.2 | 1.5 | 2.2  | 2.2  |
| <b>ZS 309</b>  | 2.5 | 6.3 | 9.8  | 2.6  |
| <b>ZS 316</b>  | 1.2 | 1.2 | 1.2  | 1.3  |
| <b>ZS 319</b>  | 1.2 | 1.1 | 1.2  | 1.0  |
| <b>ZS 325</b>  | 1.2 | 1.2 | 1.5  | 1.5  |
| <b>MID 213</b> | 1.4 | 2.4 | 5.0  | 4.2  |
| <b>M 2767</b>  | 1.6 | 2.2 | 12.5 | 42.6 |
| <b>M 2876</b>  | 1.2 | 1.1 | 1.2  | 1.0  |
| <b>SH 16</b>   | 2.0 | 7.2 | 7.1  | 1.2  |
| <b>SAI 472</b> | 1.5 | 2.5 | 1.8  | 0.9  |
| <b>SAI 499</b> | 1.2 | 1.1 | 1.1  | 1.1  |
| <b>SAI 503</b> | 1.3 | 1.3 | 1.1  | 1.1  |
| <b>SAI 474</b> | 1.3 | 1.1 | 1.1  | 1.0  |
| <b>SAI 477</b> | 3.4 | 1.8 | 1.2  | 1.1  |
| <b>N 1196</b>  | 1.3 | 1.4 | 2.6  | 5.4  |
| <b>N 1197</b>  | 1.2 | 1.2 | 1.2  | 1.2  |
| <b>SAI 127</b> | 2.4 | 5.0 | 2.0  | 1.1  |
| <b>N 1056</b>  | 1.2 | 1.2 | 1.8  | 3.8  |
| <b>N 1068</b>  | 1.2 | 1.1 | 1.2  | 1.1  |
| <b>N 1069</b>  | 1.2 | 1.3 | 1.4  | 1.3  |
| <b>A9</b>      | 1.2 | 1.2 | 1.2  | 1.1  |
| <b>N 1198</b>  | 1.2 | 1.1 | 1.3  | 1.2  |
| <b>N 1193</b>  | 2.9 | 5.5 | 21.5 | 31.6 |
| <b>N 1199</b>  | 2.2 | 6.0 | 10.6 | 2.1  |
| <b>SAI 363</b> | 2.0 | 4.6 | 1.4  | 0.9  |
| <b>SAI 366</b> | 4.2 | 9.8 | 2.2  | 1.2  |
| <b>SAI 362</b> | 2.4 | 5.2 | 1.5  | 1.3  |
| <b>SAI 365</b> | 3.9 | 8.7 | 2.7  | 1.1  |
| <b>SAI 120</b> | 1.3 | 1.3 | 1.4  | 1.2  |
| <b>SAI 458</b> | 1.8 | 2.9 | 1.3  | 1.1  |
| <b>SAI 459</b> | 1.2 | 1.2 | 1.2  | 1.0  |
| <b>SAI 487</b> | 1.2 | 1.1 | 1.2  | 1.2  |
| <b>N 1131</b>  | 1.9 | 4.4 | 1.7  | 1.1  |
| <b>MID 323</b> | 1.2 | 1.3 | 2.6  | 4.2  |
| <b>SAI 379</b> | 2.1 | 2.8 | 1.4  | 1.1  |
| <b>SAI 367</b> | 2.9 | 5.1 | 2.6  | 1.3  |
| <b>M 2738d</b> | 1.6 | 7.4 | 13.1 | 1.1  |
| <b>ZS 260</b>  | 3.0 | 7.3 | 10.3 | 6.4  |
| <b>N 871a</b>  | 3.0 | 7.0 | 8.6  | 2.9  |
| <b>N 901</b>   | 1.7 | 2.9 | 4.3  | 4.7  |

**Table S2.5.** Results of interaction with nano-pFAST

| <b>Cmpd</b>     | <b>Enhancement</b> |            |            |            |
|-----------------|--------------------|------------|------------|------------|
|                 | <b>430</b>         | <b>480</b> | <b>530</b> | <b>580</b> |
| <b>HBR-DOM2</b> | 28.0               | >206.2     | >386.1     | 3.2        |
| <b>N 1036</b>   | 1.5                | 3.7        | 1.5        | 1.1        |
| <b>N 1048</b>   | 1.7                | 4.6        | 24.4       | 43.0       |
| <b>SAI 472</b>  | 5.8                | 16.5       | 9.5        | 1.0        |
| <b>SAI 503</b>  | 1.3                | 1.1        | 1.0        | 1.0        |
| <b>SAI 477</b>  | 39.4               | 16.6       | 1.1        | 1.0        |
| <b>N 1056</b>   | 1.1                | 1.1        | 1.7        | 2.7        |
| <b>M 2738d</b>  | 1.9                | 18.4       | 37.2       | 1.1        |

**Table S2.6.** Results of interaction with nano-tFAST

| <b>Cmpd</b>       | <b>Enhancement</b> |            |            |            |
|-------------------|--------------------|------------|------------|------------|
|                   | <b>430</b>         | <b>480</b> | <b>530</b> | <b>580</b> |
| <b>HBR-DOM2</b>   | 30.2               | >235.0     | >365.8     | 2.5        |
| <b>HBR-2,5-DM</b> | 27.0               | >166.8     | 35.7       | 1.1        |
| <b>HMBR</b>       | 8.4                | 24.4       | 2.1        | 0.9        |
| <b>HBR-DOM</b>    | 2.1                | 12.9       | 26.6       | 4.0        |
| <b>N 871b</b>     | 1.5                | 4.8        | 9.3        | 9.0        |
| <b>MID 145</b>    | 1.6                | 4.2        | 6.9        | 1.3        |
| <b>N 1052</b>     | 1.3                | 2.5        | 4.6        | 3.4        |
| <b>N 1184</b>     | 1.4                | 4.5        | 8.8        | 3.0        |
| <b>N 1122</b>     | 1.3                | 1.5        | 1.3        | 1.2        |
| <b>N 1049</b>     | 1.2                | 1.9        | 3.1        | 1.9        |
| <b>N 1123</b>     | 1.1                | 1.2        | 1.7        | 1.8        |
| <b>N 1139</b>     | 1.1                | 2.0        | 6.2        | 10.6       |
| <b>N 1118</b>     | 1.4                | 1.9        | 1.7        | 1.2        |
| <b>SAI 112</b>    | 6.8                | 17.0       | 3.3        | 0.9        |
| <b>N 1135</b>     | 1.1                | 1.1        | 1.2        | 1.3        |
| <b>SAI 118</b>    | 4.9                | 5.3        | 1.5        | 0.9        |
| <b>N 1124</b>     | 1.1                | 1.2        | 1.4        | 1.6        |
| <b>SAI 122</b>    | 8.7                | 6.6        | 1.5        | 1.2        |
| <b>N 1142</b>     | 1.2                | 1.6        | 2.1        | 1.3        |
| <b>SAI 199</b>    | 10.8               | 8.0        | 1.1        | 1.1        |
| <b>N 967</b>      | 1.0                | 1.3        | 2.1        | 3.0        |
| <b>N 1039</b>     | 2.0                | 6.1        | 12.5       | 5.6        |
| <b>N 1202</b>     | 1.5                | 4.8        | 9.9        | 7.9        |
| <b>N 960b</b>     | 1.2                | 2.0        | 4.2        | 7.2        |
| <b>N 1036</b>     | 1.1                | 1.3        | 1.1        | 1.1        |
| <b>SAI 117</b>    | 7.8                | 10.6       | 1.4        | 0.9        |
| <b>N 1042</b>     | 1.0                | 1.0        | 1.1        | 1.0        |
| <b>SAI 121</b>    | 6.6                | 6.1        | 1.3        | 1.0        |
| <b>MID 147</b>    | 2.7                | 8.1        | 13.5       | 8.8        |
| <b>SAI 125</b>    | 10.4               | 13.0       | 1.3        | 1.1        |
| <b>MID 151</b>    | 1.1                | 1.1        | 1.4        | 1.9        |
| <b>N 865</b>      | 1.0                | 1.0        | 1.0        | 1.1        |
| <b>MID 153</b>    | 1.1                | 1.1        | 1.3        | 1.6        |
| <b>MID 343</b>    | 1.1                | 1.4        | 3.5        | 8.2        |
| <b>M 3007a</b>    | 1.1                | 1.3        | 2.3        | 2.4        |
| <b>MID 367</b>    | 1.1                | 1.1        | 1.6        | 2.4        |
| <b>N 1048</b>     | 1.3                | 2.8        | 8.6        | 14.6       |
| <b>N 979</b>      | 1.0                | 1.0        | 1.1        | 1.1        |
| <b>N 971</b>      | 1.0                | 1.0        | 1.0        | 1.1        |
| <b>N 973</b>      | 1.1                | 1.1        | 1.3        | 1.5        |
| <b>N 976</b>      | 1.1                | 1.0        | 1.0        | 1.2        |
| <b>N 980</b>      | 1.1                | 1.1        | 1.1        | 1.3        |
| <b>N 1205</b>     | 2.6                | 7.4        | 13.4       | 6.7        |
| <b>N 960a</b>     | 1.1                | 1.3        | 1.4        | 1.2        |

|                |      |       |      |      |
|----------------|------|-------|------|------|
| <b>ZS 331</b>  | 1.5  | 2.8   | 4.6  | 4.7  |
| <b>N 1027</b>  | 1.0  | 1.0   | 1.1  | 0.9  |
| <b>M 2766</b>  | 1.6  | 4.6   | 8.8  | 5.6  |
| <b>ZS 362</b>  | 1.0  | 1.0   | 1.0  | 1.1  |
| <b>N 1179</b>  | 1.1  | 1.1   | 1.1  | 1.2  |
| <b>N 1180</b>  | 1.1  | 1.1   | 1.1  | 1.2  |
| <b>N 1204</b>  | 2.0  | 5.0   | 9.0  | 4.1  |
| <b>N 1206</b>  | 1.1  | 1.1   | 1.6  | 2.3  |
| <b>ZS 309</b>  | 1.7  | 3.0   | 5.2  | 4.2  |
| <b>ZS 316</b>  | 1.1  | 1.0   | 1.0  | 1.0  |
| <b>ZS 319</b>  | 1.0  | 1.0   | 1.0  | 1.0  |
| <b>ZS 325</b>  | 1.1  | 1.0   | 1.1  | 1.0  |
| <b>MID 213</b> | 1.1  | 1.2   | 1.5  | 1.7  |
| <b>M 2767</b>  | 1.7  | 4.6   | 12.0 | 16.0 |
| <b>M 2876</b>  | 1.1  | 1.0   | 1.0  | 1.1  |
| <b>SH 16</b>   | 1.4  | 2.2   | 2.5  | 1.1  |
| <b>SAI 472</b> | 3.6  | 7.2   | 3.2  | 1.1  |
| <b>SAI 499</b> | 1.5  | 1.3   | 1.0  | 1.0  |
| <b>SAI 503</b> | 1.2  | 1.1   | 1.0  | 1.0  |
| <b>SAI 474</b> | 2.8  | 1.0   | 1.1  | 1.0  |
| <b>SAI 477</b> | 30.2 | 10.4  | 1.0  | 1.0  |
| <b>N 1196</b>  | 1.1  | 1.1   | 1.2  | 1.1  |
| <b>N 1197</b>  | 1.1  | 1.1   | 1.1  | 1.1  |
| <b>SAI 127</b> | 7.6  | 20.2  | 1.8  | 1.0  |
| <b>N 1056</b>  | 1.1  | 1.1   | 1.6  | 2.4  |
| <b>N 1068</b>  | 1.1  | 1.1   | 1.1  | 1.2  |
| <b>N 1069</b>  | 1.0  | 1.3   | 1.3  | 1.0  |
| <b>A9</b>      | 1.1  | 1.1   | 1.0  | 0.9  |
| <b>N 1198</b>  | 1.1  | 1.1   | 1.1  | 1.1  |
| <b>N 1193</b>  | 4.1  | 6.6   | 4.9  | 6.2  |
| <b>N 1199</b>  | 1.2  | 1.7   | 2.8  | 2.0  |
| <b>SAI 363</b> | 14.4 | 33.7  | 1.4  | 1.1  |
| <b>SAI 366</b> | 23.0 | >67.5 | 3.8  | 1.0  |
| <b>SAI 362</b> | 24.7 | 82.1  | 3.0  | 0.9  |
| <b>SAI 365</b> | 20.1 | >60.3 | 4.6  | 1.0  |
| <b>SAI 120</b> | 1.2  | 1.2   | 1.3  | 1.2  |
| <b>SAI 458</b> | 10.9 | 31.0  | 1.7  | 1.0  |
| <b>SAI 459</b> | 1.1  | 1.0   | 1.0  | 0.9  |
| <b>SAI 487</b> | 1.0  | 1.0   | 1.0  | 1.1  |
| <b>N 1131</b>  | 1.2  | 1.4   | 1.2  | 0.8  |
| <b>MID 323</b> | 1.1  | 1.2   | 2.3  | 4.2  |
| <b>SAI 379</b> | 3.3  | 3.1   | 1.1  | 0.9  |
| <b>SAI 367</b> | 2.4  | 2.2   | 1.3  | 1.1  |
| <b>M 2738d</b> | 1.4  | 5.6   | 10.2 | 0.9  |
| <b>ZS 260</b>  | 2.8  | 6.0   | 6.5  | 2.4  |
| <b>N 871a</b>  | 2.9  | 7.7   | 14.8 | 10.4 |
| <b>N 901</b>   | 1.1  | 1.3   | 1.9  | 2.7  |



**Table S2.7.** Results of interaction with nano-greenFAST

| <b>Cmpd</b>       | <b>Enhancement</b> |            |            |            |
|-------------------|--------------------|------------|------------|------------|
|                   | <b>430</b>         | <b>480</b> | <b>530</b> | <b>580</b> |
| <b>HBR-DOM2</b>   | 2.1                | 7.2        | 8.8        | 1.1        |
| <b>HBR-2,5-DM</b> | 1.7                | 2.5        | 1.4        | 1.0        |
| <b>HMBR</b>       | 3.6                | 7.4        | 1.2        | 1.0        |
| <b>HBR-DOM</b>    | 1.1                | 1.2        | 1.5        | 1.1        |
| <b>N 871b</b>     | 1.0                | 1.0        | 1.0        | 1.0        |
| <b>MID 145</b>    | 1.2                | 1.4        | 1.2        | 1.1        |
| <b>N 1052</b>     | 1.2                | 1.8        | 2.4        | 1.9        |
| <b>N 1184</b>     | 1.0                | 1.0        | 1.1        | 1.2        |
| <b>N 1122</b>     | 1.0                | 1.1        | 1.1        | 1.0        |
| <b>N 1049</b>     | 1.1                | 1.3        | 1.6        | 1.2        |
| <b>N 1123</b>     | 1.0                | 1.0        | 1.1        | 1.1        |
| <b>N 1139</b>     | 1.0                | 1.1        | 1.7        | 2.1        |
| <b>N 1118</b>     | 1.1                | 1.1        | 1.1        | 1.1        |
| <b>SAI 112</b>    | 2.2                | 5.2        | 2.9        | 1.0        |
| <b>N 1135</b>     | 1.0                | 1.0        | 1.1        | 1.1        |
| <b>SAI 118</b>    | 1.5                | 1.8        | 1.0        | 1.1        |
| <b>N 1124</b>     | 1.0                | 1.0        | 1.0        | 1.1        |
| <b>SAI 122</b>    | 1.3                | 1.4        | 1.3        | 1.1        |
| <b>N 1142</b>     | 1.1                | 1.3        | 1.4        | 1.3        |
| <b>SAI 199</b>    | 1.2                | 1.1        | 1.0        | 1.1        |
| <b>N 967</b>      | 1.0                | 1.0        | 1.1        | 1.2        |
| <b>N 1039</b>     | 1.2                | 1.4        | 1.5        | 1.2        |
| <b>N 1202</b>     | 1.0                | 0.9        | 1.0        | 1.1        |
| <b>N 960b</b>     | 1.0                | 1.1        | 1.2        | 1.3        |
| <b>N 1036</b>     | 1.0                | 0.9        | 0.9        | 1.0        |
| <b>SAI 117</b>    | 3.1                | 4.5        | 1.2        | 1.0        |
| <b>N 1042</b>     | 1.0                | 1.0        | 1.0        | 1.1        |
| <b>SAI 121</b>    | 1.5                | 1.8        | 1.2        | 1.0        |
| <b>MID 147</b>    | 1.9                | 4.2        | 6.1        | 2.2        |
| <b>SAI 125</b>    | 2.9                | 3.9        | 1.1        | 1.1        |
| <b>MID 151</b>    | 1.0                | 0.9        | 1.0        | 1.0        |
| <b>N 865</b>      | 1.0                | 1.0        | 1.0        | 1.2        |
| <b>MID 153</b>    | 1.0                | 1.0        | 1.0        | 0.9        |
| <b>MID 343</b>    | 1.1                | 1.2        | 2.2        | 4.3        |
| <b>M 3007a</b>    | 1.0                | 1.1        | 1.2        | 0.8        |
| <b>MID 367</b>    | 1.0                | 1.0        | 1.1        | 1.1        |
| <b>N 1048</b>     | 1.0                | 1.0        | 1.1        | 1.1        |
| <b>N 979</b>      | 1.0                | 1.0        | 1.0        | 1.2        |
| <b>N 971</b>      | 1.0                | 1.0        | 0.9        | 0.9        |
| <b>N 973</b>      | 1.0                | 1.0        | 1.1        | 1.1        |
| <b>N 976</b>      | 1.0                | 1.0        | 1.0        | 0.8        |
| <b>N 980</b>      | 1.0                | 1.0        | 1.1        | 1.1        |
| <b>N 1205</b>     | 1.2                | 1.3        | 1.4        | 1.5        |
| <b>N 960a</b>     | 1.0                | 1.0        | 1.0        | 1.3        |

|                |     |     |     |     |
|----------------|-----|-----|-----|-----|
| <b>ZS 331</b>  | 1.1 | 1.3 | 1.4 | 1.3 |
| <b>N 1027</b>  | 1.0 | 1.0 | 1.0 | 0.9 |
| <b>M 2766</b>  | 1.0 | 1.0 | 1.0 | 1.1 |
| <b>ZS 362</b>  | 1.0 | 1.0 | 1.0 | 1.0 |
| <b>N 1179</b>  | 1.0 | 1.0 | 1.0 | 1.0 |
| <b>N 1180</b>  | 1.0 | 1.0 | 1.0 | 1.1 |
| <b>N 1204</b>  | 1.1 | 1.2 | 1.2 | 1.6 |
| <b>N 1206</b>  | 1.0 | 1.1 | 1.1 | 1.3 |
| <b>ZS 309</b>  | 1.3 | 1.8 | 2.4 | 2.0 |
| <b>ZS 316</b>  | 1.0 | 1.0 | 1.0 | 0.8 |
| <b>ZS 319</b>  | 1.0 | 0.9 | 0.9 | 0.9 |
| <b>ZS 325</b>  | 1.0 | 1.0 | 1.0 | 1.1 |
| <b>MID 213</b> | 1.0 | 1.0 | 1.2 | 1.1 |
| <b>M 2767</b>  | 1.1 | 1.3 | 1.9 | 2.3 |
| <b>M 2876</b>  | 1.0 | 1.0 | 1.0 | 1.0 |
| <b>SH 16</b>   | 1.1 | 1.0 | 1.1 | 0.9 |
| <b>SAI 472</b> | 1.1 | 1.1 | 1.0 | 1.0 |
| <b>SAI 499</b> | 1.0 | 1.0 | 1.0 | 1.0 |
| <b>SAI 503</b> | 1.0 | 1.0 | 1.0 | 1.1 |
| <b>SAI 474</b> | 1.0 | 1.0 | 1.0 | 0.9 |
| <b>SAI 477</b> | 1.2 | 1.0 | 1.0 | 1.1 |
| <b>N 1196</b>  | 1.0 | 1.0 | 1.1 | 0.9 |
| <b>N 1197</b>  | 1.0 | 1.0 | 1.0 | 1.1 |
| <b>SAI 127</b> | 1.8 | 3.9 | 2.0 | 0.9 |
| <b>N 1056</b>  | 1.0 | 1.0 | 1.1 | 1.1 |
| <b>N 1068</b>  | 1.0 | 1.0 | 1.1 | 1.1 |
| <b>N 1069</b>  | 1.0 | 1.2 | 1.3 | 1.0 |
| <b>A9</b>      | 1.0 | 1.0 | 0.9 | 1.1 |
| <b>N 1198</b>  | 1.0 | 1.0 | 1.0 | 1.1 |
| <b>N 1193</b>  | 3.6 | 6.1 | 2.8 | 2.6 |
| <b>N 1199</b>  | 1.1 | 1.3 | 1.9 | 1.2 |
| <b>SAI 363</b> | 1.2 | 1.7 | 1.2 | 1.1 |
| <b>SAI 366</b> | 3.8 | 7.6 | 2.0 | 0.9 |
| <b>SAI 362</b> | 1.3 | 1.8 | 1.1 | 1.2 |
| <b>SAI 365</b> | 3.3 | 6.8 | 2.7 | 1.0 |
| <b>SAI 120</b> | 1.1 | 1.1 | 1.1 | 1.0 |
| <b>SAI 458</b> | 1.0 | 1.1 | 1.0 | 1.0 |
| <b>SAI 459</b> | 1.0 | 1.0 | 1.0 | 1.0 |
| <b>SAI 487</b> | 1.0 | 1.0 | 1.0 | 1.0 |
| <b>N 1131</b>  | 1.0 | 1.0 | 1.0 | 0.9 |
| <b>MID 323</b> | 1.0 | 1.1 | 1.5 | 1.5 |
| <b>SAI 379</b> | 1.4 | 1.8 | 1.1 | 1.1 |
| <b>SAI 367</b> | 1.5 | 1.3 | 1.1 | 1.1 |
| <b>M 2738d</b> | 1.0 | 1.5 | 2.1 | 1.0 |
| <b>ZS 260</b>  | 1.7 | 3.0 | 2.8 | 1.4 |
| <b>N 871a</b>  | 1.9 | 3.4 | 3.6 | 1.8 |
| <b>N 901</b>   | 1.0 | 1.0 | 1.2 | 1.5 |

**Table S2.8.** Results of interaction with nano-redFAST

| <b>Cmpd</b>       | <b>Enhancement</b> |            |            |            |
|-------------------|--------------------|------------|------------|------------|
|                   | <b>430</b>         | <b>480</b> | <b>530</b> | <b>580</b> |
| <b>HBR-DOM2</b>   | 14.5               | >151.7     | >400.5     | 15.4       |
| <b>HBR-2,5-DM</b> | 14.0               | >153.1     | 194.4      | 1.3        |
| <b>HMBR</b>       | 9.1                | 54.8       | 18.3       | 0.9        |
| <b>HBR-DOM</b>    | 4.4                | 45.0       | 204.5      | 69.3       |
| <b>N 871b</b>     | 1.1                | 1.9        | 5.1        | 12.2       |
| <b>MID 145</b>    | 1.2                | 2.1        | 4.8        | 1.7        |
| <b>N 1052</b>     | 1.1                | 1.5        | 2.7        | 2.9        |
| <b>N 1184</b>     | 1.1                | 1.7        | 4.7        | 5.2        |
| <b>N 1122</b>     | 1.1                | 1.2        | 1.2        | 0.9        |
| <b>N 1049</b>     | 1.1                | 1.5        | 3.2        | 3.3        |
| <b>N 1123</b>     | 1.0                | 1.0        | 1.3        | 1.6        |
| <b>N 1139</b>     | 1.0                | 1.2        | 2.7        | 4.5        |
| <b>N 1118</b>     | 1.1                | 1.4        | 1.3        | 1.1        |
| <b>SAI 112</b>    | 11.9               | >65.1      | 5.1        | 1.0        |
| <b>N 1135</b>     | 1.0                | 1.0        | 1.1        | 1.2        |
| <b>SAI 118</b>    | 13.0               | 49.5       | 3.2        | 1.0        |
| <b>N 1124</b>     | 1.0                | 1.0        | 1.2        | 1.7        |
| <b>SAI 122</b>    | 11.0               | 36.7       | 1.9        | 1.2        |
| <b>N 1142</b>     | 1.1                | 1.4        | 2.0        | 1.5        |
| <b>SAI 199</b>    | 15.3               | 51.8       | 1.8        | 0.9        |
| <b>N 967</b>      | 1.0                | 1.1        | 1.5        | 2.4        |
| <b>N 1039</b>     | 1.3                | 2.4        | 7.6        | 7.5        |
| <b>N 1202</b>     | 1.0                | 1.8        | 5.6        | 12.0       |
| <b>N 960b</b>     | 1.0                | 1.1        | 2.0        | 3.8        |
| <b>N 1036</b>     | 1.0                | 1.2        | 1.1        | 1.1        |
| <b>SAI 117</b>    | 13.5               | 52.0       | 3.0        | 1.0        |
| <b>N 1042</b>     | 1.0                | 1.0        | 1.0        | 1.0        |
| <b>SAI 121</b>    | 9.9                | 38.8       | 2.4        | 0.9        |
| <b>MID 147</b>    | 1.9                | 3.7        | 8.3        | 10.8       |
| <b>SAI 125</b>    | 16.5               | 66.5       | 4.0        | 1.1        |
| <b>MID 151</b>    | 1.0                | 1.0        | 1.0        | 1.2        |
| <b>N 865</b>      | 1.0                | 1.0        | 1.0        | 1.0        |
| <b>MID 153</b>    | 1.0                | 1.0        | 1.0        | 1.2        |
| <b>MID 343</b>    | 1.0                | 1.0        | 1.7        | 4.1        |
| <b>M 3007a</b>    | 1.0                | 1.0        | 1.4        | 1.8        |
| <b>MID 367</b>    | 1.0                | 1.0        | 1.2        | 1.7        |
| <b>N 1048</b>     | 1.1                | 1.4        | 4.6        | 10.7       |
| <b>N 979</b>      | 1.0                | 0.9        | 1.0        | 1.4        |
| <b>N 971</b>      | 1.0                | 1.0        | 1.0        | 1.1        |
| <b>N 973</b>      | 1.0                | 1.0        | 1.1        | 1.2        |
| <b>N 976</b>      | 1.0                | 1.0        | 1.0        | 1.0        |
| <b>N 980</b>      | 1.0                | 1.0        | 1.1        | 1.1        |
| <b>N 1205</b>     | 1.9                | 7.4        | 24.7       | 29.7       |
| <b>N 960a</b>     | 1.0                | 1.0        | 1.1        | 1.2        |

|                |      |        |      |      |
|----------------|------|--------|------|------|
| <b>ZS 331</b>  | 1.1  | 1.3    | 2.1  | 3.7  |
| <b>N 1027</b>  | 1.0  | 1.0    | 1.0  | 1.0  |
| <b>M 2766</b>  | 1.1  | 2.0    | 5.5  | 9.8  |
| <b>ZS 362</b>  | 1.0  | 1.0    | 1.0  | 1.1  |
| <b>N 1179</b>  | 1.1  | 1.1    | 1.0  | 1.1  |
| <b>N 1180</b>  | 1.0  | 1.0    | 1.1  | 1.3  |
| <b>N 1204</b>  | 1.6  | 5.4    | 17.4 | 17.1 |
| <b>N 1206</b>  | 1.0  | 1.0    | 1.6  | 2.8  |
| <b>ZS 309</b>  | 1.3  | 1.8    | 3.0  | 2.7  |
| <b>ZS 316</b>  | 1.0  | 1.0    | 1.0  | 1.0  |
| <b>ZS 319</b>  | 1.0  | 0.9    | 1.2  | 1.0  |
| <b>ZS 325</b>  | 1.0  | 1.0    | 1.0  | 0.9  |
| <b>MID 213</b> | 1.0  | 1.1    | 1.1  | 1.5  |
| <b>M 2767</b>  | 1.3  | 2.0    | 3.1  | 7.1  |
| <b>M 2876</b>  | 1.0  | 1.0    | 1.1  | 1.1  |
| <b>SH 16</b>   | 1.1  | 1.9    | 2.6  | 1.2  |
| <b>SAI 472</b> | 1.6  | 3.5    | 2.2  | 0.9  |
| <b>SAI 499</b> | 1.1  | 1.2    | 1.0  | 1.1  |
| <b>SAI 503</b> | 1.0  | 1.0    | 1.1  | 0.9  |
| <b>SAI 474</b> | 2.4  | 1.0    | 1.1  | 1.1  |
| <b>SAI 477</b> | 16.7 | 11.5   | 3.9  | 3.4  |
| <b>N 1196</b>  | 1.0  | 1.0    | 1.0  | 0.9  |
| <b>N 1197</b>  | 1.0  | 1.0    | 1.1  | 1.0  |
| <b>SAI 127</b> | 13.6 | >69.8  | 3.9  | 1.2  |
| <b>N 1056</b>  | 1.0  | 1.0    | 1.3  | 1.9  |
| <b>N 1068</b>  | 1.0  | 1.0    | 1.0  | 0.9  |
| <b>N 1069</b>  | 1.0  | 1.1    | 1.0  | 1.0  |
| <b>A9</b>      | 1.0  | 1.0    | 1.0  | 1.0  |
| <b>N 1198</b>  | 1.0  | 1.0    | 1.0  | 1.0  |
| <b>N 1193</b>  | 1.6  | 2.2    | 2.4  | 2.9  |
| <b>N 1199</b>  | 1.1  | 1.5    | 2.7  | 2.3  |
| <b>SAI 363</b> | 7.7  | 35.4   | 5.3  | 2.1  |
| <b>SAI 366</b> | 19.2 | >89.0  | 7.4  | 3.3  |
| <b>SAI 362</b> | 15.8 | >105.4 | 6.9  | 2.1  |
| <b>SAI 365</b> | 18.3 | >86.8  | 3.7  | 2.0  |
| <b>SAI 120</b> | 1.1  | 1.1    | 1.2  | 1.0  |
| <b>SAI 458</b> | 5.7  | 28.7   | 8.1  | 1.5  |
| <b>SAI 459</b> | 1.0  | 1.0    | 1.1  | 1.2  |
| <b>SAI 487</b> | 1.0  | 1.0    | 1.1  | 1.1  |
| <b>N 1131</b>  | 1.0  | 1.3    | 1.1  | 1.0  |
| <b>MID 323</b> | 1.0  | 1.1    | 1.6  | 2.4  |
| <b>SAI 379</b> | 7.1  | 13.1   | 1.2  | 1.0  |
| <b>SAI 367</b> | 1.3  | 1.4    | 1.4  | 0.9  |
| <b>M 2738d</b> | 1.1  | 3.2    | 5.7  | 1.0  |
| <b>ZS 260</b>  | 1.5  | 2.4    | 2.9  | 2.0  |
| <b>N 871a</b>  | 1.8  | 3.3    | 6.9  | 10.4 |
| <b>N 901</b>   | 2.5  | 8.4    | 20.8 | 26.3 |

**Table S2.9.** Results of interaction with nanoFAST-R52F

| <b>Cmpd</b>       | <b>Enhancement</b> |            |            |            |
|-------------------|--------------------|------------|------------|------------|
|                   | <b>430</b>         | <b>480</b> | <b>530</b> | <b>580</b> |
| <b>HBR-DOM2</b>   | 4.0                | 27.4       | 59.3       | 1.5        |
| <b>HBR-2,5-DM</b> | 1.1                | 1.5        | 1.2        | 0.9        |
| <b>HMBR</b>       | 1.1                | 1.3        | 1.1        | 1.0        |
| <b>HBR-DOM</b>    | 1.0                | 1.1        | 1.3        | 1.2        |
| <b>N 871b</b>     | 1.0                | 1.1        | 1.3        | 1.2        |
| <b>MID 145</b>    | 1.2                | 1.3        | 1.2        | 1.1        |
| <b>N 1052</b>     | 1.1                | 1.4        | 1.7        | 1.2        |
| <b>N 1184</b>     | 1.0                | 1.1        | 1.2        | 1.1        |
| <b>N 1122</b>     | 1.1                | 1.2        | 1.2        | 1.2        |
| <b>N 1049</b>     | 1.1                | 1.3        | 1.4        | 1.1        |
| <b>N 1123</b>     | 1.0                | 1.0        | 1.0        | 1.1        |
| <b>N 1139</b>     | 1.0                | 1.1        | 1.7        | 2.3        |
| <b>N 1118</b>     | 1.1                | 1.3        | 1.1        | 1.0        |
| <b>SAI 112</b>    | 1.3                | 1.9        | 1.5        | 1.0        |
| <b>N 1135</b>     | 1.0                | 1.0        | 1.1        | 1.2        |
| <b>SAI 118</b>    | 0.9                | 1.0        | 1.0        | 1.1        |
| <b>N 1124</b>     | 1.0                | 1.0        | 1.0        | 1.2        |
| <b>SAI 122</b>    | 3.9                | 4.3        | 1.2        | 1.0        |
| <b>N 1142</b>     | 1.1                | 1.2        | 1.3        | 1.0        |
| <b>SAI 199</b>    | 5.2                | 5.8        | 1.0        | 1.0        |
| <b>N 967</b>      | 1.0                | 1.0        | 1.4        | 1.7        |
| <b>N 1039</b>     | 1.1                | 1.3        | 1.4        | 1.2        |
| <b>N 1202</b>     | 1.0                | 1.0        | 1.2        | 1.1        |
| <b>N 960b</b>     | 1.0                | 1.1        | 1.5        | 1.7        |
| <b>N 1036</b>     | 1.0                | 1.0        | 1.1        | 1.1        |
| <b>SAI 117</b>    | 1.1                | 1.3        | 1.1        | 1.0        |
| <b>N 1042</b>     | 1.0                | 1.0        | 1.0        | 1.0        |
| <b>SAI 121</b>    | 1.0                | 1.1        | 1.1        | 0.9        |
| <b>MID 147</b>    | 1.6                | 2.8        | 3.8        | 1.9        |
| <b>SAI 125</b>    | 1.1                | 1.2        | 1.1        | 0.9        |
| <b>MID 151</b>    | 1.0                | 0.9        | 1.0        | 1.0        |
| <b>N 865</b>      | 1.0                | 1.0        | 1.0        | 1.0        |
| <b>MID 153</b>    | 1.0                | 0.9        | 0.9        | 0.9        |
| <b>MID 343</b>    | 1.0                | 1.0        | 1.3        | 1.4        |
| <b>M 3007a</b>    | 1.0                | 1.0        | 1.1        | 1.0        |
| <b>MID 367</b>    | 1.0                | 1.0        | 1.1        | 1.1        |
| <b>N 1048</b>     | 1.0                | 1.1        | 1.0        | 0.8        |
| <b>N 979</b>      | 1.0                | 0.9        | 1.0        | 1.0        |
| <b>N 971</b>      | 1.0                | 1.0        | 0.9        | 0.9        |
| <b>N 973</b>      | 1.0                | 1.1        | 1.1        | 1.0        |
| <b>N 976</b>      | 1.0                | 1.0        | 1.0        | 1.1        |
| <b>N 980</b>      | 1.0                | 1.0        | 1.0        | 0.9        |
| <b>N 1205</b>     | 1.3                | 1.5        | 1.8        | 1.5        |
| <b>N 960a</b>     | 1.0                | 1.1        | 1.2        | 1.1        |

|                |     |      |     |     |
|----------------|-----|------|-----|-----|
| <b>ZS 331</b>  | 1.1 | 1.1  | 1.2 | 1.1 |
| <b>N 1027</b>  | 1.0 | 1.0  | 1.0 | 1.0 |
| <b>M 2766</b>  | 1.0 | 1.1  | 1.2 | 1.1 |
| <b>ZS 362</b>  | 1.0 | 1.0  | 1.0 | 1.0 |
| <b>N 1179</b>  | 1.0 | 1.0  | 1.1 | 1.0 |
| <b>N 1180</b>  | 1.0 | 1.0  | 1.1 | 0.9 |
| <b>N 1204</b>  | 1.1 | 1.3  | 1.5 | 1.5 |
| <b>N 1206</b>  | 1.0 | 1.0  | 1.0 | 0.9 |
| <b>ZS 309</b>  | 1.2 | 1.4  | 1.9 | 1.7 |
| <b>ZS 316</b>  | 1.0 | 1.0  | 1.0 | 1.2 |
| <b>ZS 319</b>  | 1.0 | 1.0  | 1.0 | 0.8 |
| <b>ZS 325</b>  | 1.0 | 1.0  | 1.0 | 1.2 |
| <b>MID 213</b> | 1.0 | 1.0  | 1.1 | 1.0 |
| <b>M 2767</b>  | 1.2 | 1.8  | 2.8 | 3.8 |
| <b>M 2876</b>  | 1.0 | 1.0  | 1.0 | 0.9 |
| <b>SH 16</b>   | 1.0 | 1.0  | 1.0 | 1.0 |
| <b>SAI 472</b> | 1.1 | 1.2  | 1.1 | 0.9 |
| <b>SAI 499</b> | 1.0 | 1.0  | 1.0 | 1.2 |
| <b>SAI 503</b> | 1.0 | 1.0  | 1.0 | 0.8 |
| <b>SAI 474</b> | 1.0 | 1.0  | 1.0 | 1.2 |
| <b>SAI 477</b> | 1.3 | 1.2  | 1.0 | 1.1 |
| <b>N 1196</b>  | 1.0 | 1.0  | 1.0 | 1.2 |
| <b>N 1197</b>  | 1.0 | 1.0  | 1.0 | 1.3 |
| <b>SAI 127</b> | 1.1 | 1.6  | 1.2 | 1.1 |
| <b>N 1056</b>  | 1.0 | 1.0  | 1.1 | 1.2 |
| <b>N 1068</b>  | 1.0 | 1.0  | 1.1 | 1.0 |
| <b>N 1069</b>  | 1.0 | 1.0  | 1.1 | 1.1 |
| <b>A9</b>      | 1.0 | 1.0  | 1.0 | 1.0 |
| <b>N 1198</b>  | 1.0 | 1.0  | 1.0 | 1.0 |
| <b>N 1193</b>  | 1.4 | 1.8  | 2.0 | 2.3 |
| <b>N 1199</b>  | 1.0 | 1.1  | 1.4 | 1.3 |
| <b>SAI 363</b> | 1.4 | 2.5  | 1.1 | 1.0 |
| <b>SAI 366</b> | 3.7 | 10.0 | 2.4 | 1.0 |
| <b>SAI 362</b> | 3.7 | 11.2 | 1.3 | 1.0 |
| <b>SAI 365</b> | 3.5 | 9.3  | 3.1 | 0.8 |
| <b>SAI 120</b> | 1.1 | 1.1  | 1.2 | 1.2 |
| <b>SAI 458</b> | 1.3 | 2.0  | 1.1 | 1.0 |
| <b>SAI 459</b> | 1.0 | 1.0  | 1.0 | 1.0 |
| <b>SAI 487</b> | 1.0 | 1.0  | 1.0 | 1.0 |
| <b>N 1131</b>  | 1.0 | 1.0  | 1.0 | 0.9 |
| <b>MID 323</b> | 1.0 | 1.0  | 1.2 | 1.7 |
| <b>SAI 379</b> | 0.9 | 1.1  | 1.0 | 1.1 |
| <b>SAI 367</b> | 1.5 | 1.2  | 1.1 | 1.0 |
| <b>M 2738d</b> | 1.0 | 1.2  | 1.6 | 0.9 |
| <b>ZS 260</b>  | 1.4 | 2.1  | 2.1 | 1.3 |
| <b>N 871a</b>  | 1.4 | 2.2  | 2.5 | 1.8 |
| <b>N 901</b>   | 1.0 | 1.0  | 1.1 | 1.3 |

**Table S2.10.** Results of interaction with nanoFAST-R52E

| <b>Cmpd</b>       | <b>Enhancement</b> |            |            |            |
|-------------------|--------------------|------------|------------|------------|
|                   | <b>430</b>         | <b>480</b> | <b>530</b> | <b>580</b> |
| <b>HBR-DOM2</b>   | 4.4                | 34.3       | 90.2       | 1.6        |
| <b>HBR-2,5-DM</b> | 1.2                | 2.0        | 1.3        | 1.0        |
| <b>HMBR</b>       | 1.1                | 1.1        | 1.0        | 1.3        |
| <b>HBR-DOM</b>    | 1.1                | 1.1        | 1.3        | 0.9        |
| <b>N 871b</b>     | 1.0                | 1.0        | 1.0        | 1.1        |
| <b>MID 145</b>    | 1.2                | 1.3        | 1.2        | 1.0        |
| <b>N 1052</b>     | 1.1                | 1.4        | 1.6        | 1.4        |
| <b>N 1184</b>     | 1.0                | 1.0        | 1.0        | 1.0        |
| <b>N 1122</b>     | 1.1                | 1.2        | 1.1        | 1.1        |
| <b>N 1049</b>     | 1.1                | 1.3        | 1.4        | 1.1        |
| <b>N 1123</b>     | 1.0                | 1.0        | 1.0        | 1.0        |
| <b>N 1139</b>     | 1.0                | 1.1        | 1.6        | 1.8        |
| <b>N 1118</b>     | 1.1                | 1.2        | 1.2        | 1.4        |
| <b>SAI 112</b>    | 1.3                | 1.9        | 1.3        | 1.1        |
| <b>N 1135</b>     | 1.0                | 1.0        | 1.0        | 0.9        |
| <b>SAI 118</b>    | 1.0                | 1.0        | 1.0        | 1.0        |
| <b>N 1124</b>     | 1.0                | 1.0        | 0.9        | 1.1        |
| <b>SAI 122</b>    | 1.9                | 2.1        | 1.1        | 1.0        |
| <b>N 1142</b>     | 1.1                | 1.2        | 1.3        | 1.1        |
| <b>SAI 199</b>    | 1.8                | 1.9        | 1.0        | 1.1        |
| <b>N 967</b>      | 1.0                | 1.0        | 1.0        | 1.1        |
| <b>N 1039</b>     | 1.2                | 1.3        | 1.3        | 1.2        |
| <b>N 1202</b>     | 1.0                | 1.0        | 1.0        | 1.0        |
| <b>N 960b</b>     | 1.0                | 1.1        | 1.2        | 1.3        |
| <b>N 1036</b>     | 1.0                | 1.0        | 1.0        | 0.9        |
| <b>SAI 117</b>    | 1.1                | 1.2        | 1.1        | 1.1        |
| <b>N 1042</b>     | 1.0                | 1.0        | 1.0        | 1.0        |
| <b>SAI 121</b>    | 1.0                | 1.1        | 1.1        | 1.1        |
| <b>MID 147</b>    | 1.6                | 3.1        | 4.4        | 2.2        |
| <b>SAI 125</b>    | 1.0                | 1.1        | 1.1        | 1.1        |
| <b>MID 151</b>    | 1.0                | 1.0        | 1.0        | 1.0        |
| <b>N 865</b>      | 1.0                | 1.0        | 1.0        | 0.9        |
| <b>MID 153</b>    | 1.0                | 1.0        | 1.0        | 1.0        |
| <b>MID 343</b>    | 1.0                | 1.1        | 1.6        | 2.3        |
| <b>M 3007a</b>    | 1.0                | 1.0        | 1.1        | 1.0        |
| <b>MID 367</b>    | 1.0                | 1.0        | 1.1        | 1.1        |
| <b>N 1048</b>     | 1.1                | 1.1        | 1.3        | 1.4        |
| <b>N 979</b>      | 1.0                | 1.0        | 1.0        | 1.1        |
| <b>N 971</b>      | 1.0                | 1.0        | 1.0        | 1.0        |
| <b>N 973</b>      | 1.0                | 1.0        | 1.1        | 1.1        |
| <b>N 976</b>      | 1.0                | 1.0        | 1.0        | 0.9        |
| <b>N 980</b>      | 1.0                | 1.0        | 1.1        | 0.9        |
| <b>N 1205</b>     | 1.5                | 1.5        | 1.5        | 1.4        |
| <b>N 960a</b>     | 1.0                | 1.0        | 1.1        | 1.0        |



|                |     |      |     |     |
|----------------|-----|------|-----|-----|
| <b>ZS 331</b>  | 1.1 | 1.3  | 1.4 | 1.3 |
| <b>N 1027</b>  | 1.0 | 1.0  | 1.0 | 0.9 |
| <b>M 2766</b>  | 1.0 | 1.1  | 1.1 | 1.0 |
| <b>ZS 362</b>  | 1.0 | 1.0  | 1.0 | 0.9 |
| <b>N 1179</b>  | 1.0 | 1.0  | 1.0 | 1.0 |
| <b>N 1180</b>  | 1.0 | 1.0  | 1.0 | 0.8 |
| <b>N 1204</b>  | 1.3 | 1.4  | 1.2 | 1.4 |
| <b>N 1206</b>  | 1.0 | 1.0  | 1.0 | 1.0 |
| <b>ZS 309</b>  | 1.1 | 1.3  | 1.6 | 1.2 |
| <b>ZS 316</b>  | 1.0 | 1.0  | 1.0 | 1.0 |
| <b>ZS 319</b>  | 1.0 | 1.0  | 1.0 | 1.0 |
| <b>ZS 325</b>  | 1.0 | 1.0  | 1.0 | 1.0 |
| <b>MID 213</b> | 1.0 | 1.0  | 1.1 | 0.9 |
| <b>M 2767</b>  | 1.3 | 2.6  | 4.7 | 4.1 |
| <b>M 2876</b>  | 1.0 | 1.0  | 1.0 | 1.0 |
| <b>SH 16</b>   | 1.0 | 1.0  | 1.0 | 0.9 |
| <b>SAI 472</b> | 1.1 | 1.2  | 1.2 | 1.1 |
| <b>SAI 499</b> | 1.0 | 1.0  | 1.0 | 1.1 |
| <b>SAI 503</b> | 1.0 | 1.0  | 1.0 | 1.1 |
| <b>SAI 474</b> | 1.0 | 1.0  | 1.0 | 0.9 |
| <b>SAI 477</b> | 1.7 | 1.5  | 1.0 | 0.9 |
| <b>N 1196</b>  | 1.0 | 1.0  | 1.0 | 1.0 |
| <b>N 1197</b>  | 1.0 | 1.0  | 1.0 | 0.9 |
| <b>SAI 127</b> | 1.1 | 1.5  | 1.1 | 0.9 |
| <b>N 1056</b>  | 1.0 | 1.0  | 1.1 | 1.2 |
| <b>N 1068</b>  | 1.0 | 1.0  | 1.0 | 1.0 |
| <b>N 1069</b>  | 1.0 | 1.0  | 1.1 | 1.1 |
| <b>A9</b>      | 1.0 | 1.0  | 1.0 | 0.9 |
| <b>N 1198</b>  | 1.0 | 1.0  | 1.0 | 0.9 |
| <b>N 1193</b>  | 1.4 | 1.9  | 1.8 | 2.0 |
| <b>N 1199</b>  | 1.1 | 1.1  | 1.3 | 1.1 |
| <b>SAI 363</b> | 2.5 | 5.1  | 1.1 | 1.1 |
| <b>SAI 366</b> | 6.5 | 15.9 | 2.3 | 1.1 |
| <b>SAI 362</b> | 1.6 | 2.9  | 1.1 | 1.1 |
| <b>SAI 365</b> | 5.4 | 13.2 | 2.6 | 0.9 |
| <b>SAI 120</b> | 1.0 | 1.1  | 1.1 | 1.1 |
| <b>SAI 458</b> | 1.1 | 1.1  | 1.0 | 1.1 |
| <b>SAI 459</b> | 1.0 | 1.0  | 1.0 | 0.8 |
| <b>SAI 487</b> | 1.0 | 1.0  | 1.0 | 1.0 |
| <b>N 1131</b>  | 1.0 | 1.0  | 1.0 | 1.4 |
| <b>MID 323</b> | 1.0 | 1.1  | 1.2 | 1.4 |
| <b>SAI 379</b> | 1.0 | 1.1  | 1.0 | 1.1 |
| <b>SAI 367</b> | 1.2 | 1.1  | 1.0 | 0.9 |
| <b>M 2738d</b> | 1.0 | 1.2  | 1.4 | 1.0 |
| <b>ZS 260</b>  | 1.3 | 1.9  | 1.9 | 1.2 |
| <b>N 871a</b>  | 1.3 | 2.0  | 2.1 | 1.3 |
| <b>N 901</b>   | 1.0 | 0.9  | 1.0 | 1.2 |

**Table S2.11.** Results of interaction with nanoFAST-R52L

| <b>Cmpd</b>       | <b>Enhancement</b> |            |            |            |
|-------------------|--------------------|------------|------------|------------|
|                   | <b>430</b>         | <b>480</b> | <b>530</b> | <b>580</b> |
| <b>HBR-DOM2</b>   | 3.9                | 26.8       | 77.6       | 1.4        |
| <b>HBR-2,5-DM</b> | 1.2                | 2.1        | 1.3        | 1.4        |
| <b>HMBR</b>       | 1.2                | 1.5        | 1.0        | 0.6        |
| <b>HBR-DOM</b>    | 1.0                | 1.1        | 1.4        | 1.7        |
| <b>N 871b</b>     | 1.0                | 1.1        | 1.6        | 1.9        |
| <b>MID 145</b>    | 1.1                | 1.3        | 1.4        | 1.0        |
| <b>N 1052</b>     | 1.1                | 1.4        | 1.7        | 1.3        |
| <b>N 1184</b>     | 1.0                | 1.2        | 1.5        | 1.4        |
| <b>N 1122</b>     | 1.1                | 1.2        | 1.1        | 1.8        |
| <b>N 1049</b>     | 1.0                | 1.2        | 1.6        | 1.8        |
| <b>N 1123</b>     | 1.0                | 1.0        | 1.1        | 1.3        |
| <b>N 1139</b>     | 1.0                | 1.1        | 1.7        | 2.4        |
| <b>N 1118</b>     | 1.1                | 1.2        | 1.2        | 1.1        |
| <b>SAI 112</b>    | 1.2                | 1.8        | 1.4        | 1.2        |
| <b>N 1135</b>     | 1.0                | 1.0        | 1.1        | 1.2        |
| <b>SAI 118</b>    | 1.0                | 1.1        | 1.0        | 1.0        |
| <b>N 1124</b>     | 1.0                | 1.0        | 1.1        | 1.3        |
| <b>SAI 122</b>    | 4.1                | 5.0        | 1.2        | 1.3        |
| <b>N 1142</b>     | 1.1                | 1.3        | 1.5        | 1.2        |
| <b>SAI 199</b>    | 4.5                | 5.4        | 1.0        | 0.7        |
| <b>N 967</b>      | 1.0                | 1.0        | 1.2        | 1.6        |
| <b>N 1039</b>     | 1.1                | 1.3        | 1.7        | 1.9        |
| <b>N 1202</b>     | 1.0                | 1.1        | 1.6        | 1.8        |
| <b>N 960b</b>     | 1.0                | 1.1        | 1.5        | 1.8        |
| <b>N 1036</b>     | 1.0                | 1.0        | 1.0        | 1.1        |
| <b>SAI 117</b>    | 1.1                | 1.4        | 1.1        | 0.7        |
| <b>N 1042</b>     | 1.0                | 0.9        | 1.0        | 1.0        |
| <b>SAI 121</b>    | 1.1                | 1.2        | 1.1        | 0.8        |
| <b>MID 147</b>    | 1.6                | 3.1        | 4.4        | 2.5        |
| <b>SAI 125</b>    | 1.1                | 1.4        | 1.0        | 0.6        |
| <b>MID 151</b>    | 1.0                | 1.0        | 1.0        | 1.2        |
| <b>N 865</b>      | 1.0                | 1.0        | 1.0        | 1.3        |
| <b>MID 153</b>    | 1.0                | 0.9        | 0.9        | 1.1        |
| <b>MID 343</b>    | 1.0                | 1.1        | 1.6        | 3.7        |
| <b>M 3007a</b>    | 1.0                | 1.0        | 1.2        | 1.1        |
| <b>MID 367</b>    | 1.0                | 1.0        | 1.2        | 1.2        |
| <b>N 1048</b>     | 1.0                | 1.1        | 1.3        | 1.6        |
| <b>N 979</b>      | 1.0                | 1.0        | 1.0        | 0.9        |
| <b>N 971</b>      | 1.0                | 1.0        | 1.0        | 0.9        |
| <b>N 973</b>      | 1.0                | 1.0        | 1.1        | 0.7        |
| <b>N 976</b>      | 1.0                | 1.0        | 1.0        | 1.2        |
| <b>N 980</b>      | 1.0                | 1.0        | 1.0        | 0.8        |
| <b>N 1205</b>     | 1.3                | 1.6        | 2.3        | 1.7        |
| <b>N 960a</b>     | 1.0                | 1.1        | 1.1        | 1.2        |

|                |     |      |     |     |
|----------------|-----|------|-----|-----|
| <b>ZS 331</b>  | 1.1 | 1.2  | 1.4 | 1.5 |
| <b>N 1027</b>  | 1.0 | 1.0  | 1.0 | 0.8 |
| <b>M 2766</b>  | 1.0 | 1.2  | 1.5 | 1.5 |
| <b>ZS 362</b>  | 1.0 | 1.0  | 1.0 | 0.8 |
| <b>N 1179</b>  | 1.0 | 1.0  | 1.0 | 0.9 |
| <b>N 1180</b>  | 1.0 | 1.0  | 1.0 | 1.1 |
| <b>N 1204</b>  | 1.3 | 1.6  | 2.0 | 1.8 |
| <b>N 1206</b>  | 1.0 | 1.0  | 1.0 | 0.9 |
| <b>ZS 309</b>  | 1.1 | 1.3  | 1.7 | 1.6 |
| <b>ZS 316</b>  | 1.0 | 1.0  | 1.0 | 1.0 |
| <b>ZS 319</b>  | 1.0 | 1.0  | 1.0 | 1.0 |
| <b>ZS 325</b>  | 1.0 | 1.0  | 1.0 | 1.3 |
| <b>MID 213</b> | 1.0 | 1.0  | 1.1 | 1.1 |
| <b>M 2767</b>  | 1.2 | 2.0  | 3.7 | 3.8 |
| <b>M 2876</b>  | 1.0 | 1.0  | 1.0 | 1.0 |
| <b>SH 16</b>   | 1.0 | 1.1  | 1.2 | 0.9 |
| <b>SAI 472</b> | 1.1 | 1.2  | 1.1 | 1.0 |
| <b>SAI 499</b> | 1.2 | 1.1  | 1.0 | 0.8 |
| <b>SAI 503</b> | 1.0 | 1.0  | 1.0 | 1.0 |
| <b>SAI 474</b> | 1.1 | 1.0  | 1.0 | 1.0 |
| <b>SAI 477</b> | 1.8 | 1.5  | 1.0 | 1.3 |
| <b>N 1196</b>  | 1.0 | 1.0  | 1.0 | 0.9 |
| <b>N 1197</b>  | 1.1 | 1.0  | 1.0 | 1.2 |
| <b>SAI 127</b> | 1.2 | 1.8  | 1.3 | 0.8 |
| <b>N 1056</b>  | 1.0 | 1.0  | 1.1 | 1.0 |
| <b>N 1068</b>  | 1.0 | 1.0  | 1.1 | 1.2 |
| <b>N 1069</b>  | 1.0 | 1.0  | 1.1 | 1.0 |
| <b>A9</b>      | 1.0 | 1.0  | 1.0 | 0.9 |
| <b>N 1198</b>  | 1.0 | 1.0  | 1.0 | 1.1 |
| <b>N 1193</b>  | 1.7 | 2.3  | 2.2 | 2.5 |
| <b>N 1199</b>  | 1.1 | 1.2  | 1.4 | 1.0 |
| <b>SAI 363</b> | 6.2 | 16.2 | 1.4 | 0.9 |
| <b>SAI 366</b> | 8.3 | 22.9 | 3.3 | 1.1 |
| <b>SAI 362</b> | 7.4 | 22.7 | 1.8 | 0.9 |
| <b>SAI 365</b> | 6.4 | 17.6 | 3.4 | 1.2 |
| <b>SAI 120</b> | 1.1 | 1.1  | 1.2 | 0.9 |
| <b>SAI 458</b> | 1.5 | 2.7  | 1.0 | 0.8 |
| <b>SAI 459</b> | 1.0 | 1.0  | 1.0 | 1.0 |
| <b>SAI 487</b> | 1.0 | 1.0  | 1.0 | 0.9 |
| <b>N 1131</b>  | 1.0 | 1.0  | 1.0 | 1.0 |
| <b>MID 323</b> | 1.0 | 1.1  | 1.3 | 1.8 |
| <b>SAI 379</b> | 0.9 | 1.0  | 1.0 | 0.9 |
| <b>SAI 367</b> | 1.3 | 1.2  | 1.1 | 0.9 |
| <b>M 2738d</b> | 1.1 | 2.2  | 3.3 | 1.3 |
| <b>ZS 260</b>  | 1.4 | 2.1  | 2.2 | 1.3 |
| <b>N 871a</b>  | 1.3 | 1.9  | 2.1 | 1.5 |
| <b>N 901</b>   | 1.0 | 1.0  | 1.1 | 1.2 |

**Table S2.12.** Results of interaction with nanoFAST-R52N

| <b>Cmpd</b>       | <b>Enhancement</b> |            |            |            |
|-------------------|--------------------|------------|------------|------------|
|                   | <b>430</b>         | <b>480</b> | <b>530</b> | <b>580</b> |
| <b>HBR-DOM2</b>   | 9.4                | 60.8       | 95.9       | 2.0        |
| <b>HBR-2,5-DM</b> | 1.5                | 3.2        | 1.8        | 1.2        |
| <b>HMBR</b>       | 1.5                | 1.6        | 1.1        | 0.9        |
| <b>HBR-DOM</b>    | 1.0                | 1.3        | 2.0        | 1.6        |
| <b>N 871b</b>     | 1.2                | 2.0        | 3.7        | 3.8        |
| <b>MID 145</b>    | 1.2                | 1.8        | 2.6        | 1.3        |
| <b>N 1052</b>     | 1.2                | 1.7        | 2.5        | 1.8        |
| <b>N 1184</b>     | 1.2                | 1.9        | 3.3        | 1.6        |
| <b>N 1122</b>     | 1.1                | 1.2        | 1.2        | 1.1        |
| <b>N 1049</b>     | 1.1                | 1.5        | 2.2        | 1.5        |
| <b>N 1123</b>     | 1.0                | 0.9        | 0.9        | 0.7        |
| <b>N 1139</b>     | 1.0                | 1.2        | 2.1        | 3.5        |
| <b>N 1118</b>     | 1.1                | 1.4        | 1.4        | 1.1        |
| <b>SAI 112</b>    | 1.4                | 2.6        | 1.4        | 1.1        |
| <b>N 1135</b>     | 1.0                | 1.0        | 1.0        | 1.1        |
| <b>SAI 118</b>    | 1.2                | 1.5        | 1.1        | 1.3        |
| <b>N 1124</b>     | 1.0                | 1.0        | 1.0        | 1.2        |
| <b>SAI 122</b>    | 5.8                | 5.3        | 1.2        | 1.3        |
| <b>N 1142</b>     | 1.1                | 1.2        | 1.3        | 1.1        |
| <b>SAI 199</b>    | 8.1                | 7.4        | 1.0        | 1.2        |
| <b>N 967</b>      | 1.1                | 1.2        | 1.6        | 2.0        |
| <b>N 1039</b>     | 1.3                | 2.1        | 3.8        | 2.2        |
| <b>N 1202</b>     | 1.2                | 2.0        | 3.7        | 2.9        |
| <b>N 960b</b>     | 1.1                | 1.3        | 2.2        | 3.3        |
| <b>N 1036</b>     | 1.0                | 1.0        | 1.0        | 1.3        |
| <b>SAI 117</b>    | 1.3                | 1.8        | 1.1        | 1.3        |
| <b>N 1042</b>     | 1.0                | 1.0        | 1.0        | 1.1        |
| <b>SAI 121</b>    | 1.4                | 1.5        | 1.1        | 1.1        |
| <b>MID 147</b>    | 1.8                | 3.8        | 6.3        | 4.8        |
| <b>SAI 125</b>    | 1.3                | 1.8        | 1.1        | 1.1        |
| <b>MID 151</b>    | 1.0                | 1.0        | 1.1        | 1.2        |
| <b>N 865</b>      | 1.0                | 1.0        | 1.0        | 1.0        |
| <b>MID 153</b>    | 1.0                | 1.0        | 1.0        | 1.0        |
| <b>MID 343</b>    | 1.0                | 1.1        | 1.9        | 4.0        |
| <b>M 3007a</b>    | 1.0                | 1.0        | 1.2        | 1.1        |
| <b>MID 367</b>    | 1.0                | 1.0        | 1.2        | 1.8        |
| <b>N 1048</b>     | 1.1                | 1.2        | 1.6        | 1.8        |
| <b>N 979</b>      | 1.0                | 1.0        | 1.0        | 1.0        |
| <b>N 971</b>      | 1.0                | 1.0        | 1.0        | 0.9        |
| <b>N 973</b>      | 1.0                | 1.1        | 1.1        | 1.4        |
| <b>N 976</b>      | 1.0                | 1.0        | 1.0        | 0.9        |
| <b>N 980</b>      | 1.0                | 1.0        | 1.1        | 0.9        |
| <b>N 1205</b>     | 1.9                | 3.9        | 6.7        | 3.4        |
| <b>N 960a</b>     | 1.0                | 1.1        | 1.2        | 1.6        |

|                |     |      |     |     |
|----------------|-----|------|-----|-----|
| <b>ZS 331</b>  | 1.1 | 1.4  | 1.9 | 2.4 |
| <b>N 1027</b>  | 1.0 | 1.0  | 1.0 | 0.7 |
| <b>M 2766</b>  | 1.2 | 2.2  | 3.7 | 2.7 |
| <b>ZS 362</b>  | 1.0 | 1.0  | 1.0 | 1.1 |
| <b>N 1179</b>  | 1.0 | 1.0  | 1.0 | 1.7 |
| <b>N 1180</b>  | 1.0 | 1.0  | 1.0 | 1.1 |
| <b>N 1204</b>  | 1.4 | 2.4  | 3.7 | 2.0 |
| <b>N 1206</b>  | 1.0 | 1.0  | 1.0 | 0.8 |
| <b>ZS 309</b>  | 1.1 | 1.3  | 1.7 | 2.2 |
| <b>ZS 316</b>  | 1.0 | 0.9  | 0.9 | 0.9 |
| <b>ZS 319</b>  | 1.0 | 1.0  | 0.9 | 1.2 |
| <b>ZS 325</b>  | 1.0 | 1.0  | 1.0 | 1.0 |
| <b>MID 213</b> | 1.0 | 1.0  | 1.1 | 1.1 |
| <b>M 2767</b>  | 1.2 | 2.1  | 4.4 | 5.5 |
| <b>M 2876</b>  | 1.0 | 1.0  | 1.0 | 0.9 |
| <b>SH 16</b>   | 1.1 | 1.1  | 1.2 | 0.6 |
| <b>SAI 472</b> | 1.1 | 1.3  | 1.1 | 0.8 |
| <b>SAI 499</b> | 1.0 | 1.0  | 1.0 | 0.6 |
| <b>SAI 503</b> | 1.0 | 1.0  | 1.0 | 1.0 |
| <b>SAI 474</b> | 1.1 | 1.0  | 1.0 | 1.0 |
| <b>SAI 477</b> | 2.1 | 1.4  | 1.0 | 0.9 |
| <b>N 1196</b>  | 1.0 | 1.0  | 1.1 | 1.4 |
| <b>N 1197</b>  | 1.0 | 1.0  | 1.0 | 1.9 |
| <b>SAI 127</b> | 1.2 | 2.0  | 1.2 | 1.2 |
| <b>N 1056</b>  | 1.0 | 1.0  | 1.1 | 1.8 |
| <b>N 1068</b>  | 1.0 | 1.0  | 1.1 | 1.1 |
| <b>N 1069</b>  | 1.0 | 1.0  | 1.1 | 1.1 |
| <b>A9</b>      | 1.0 | 1.0  | 1.0 | 0.8 |
| <b>N 1198</b>  | 1.0 | 1.0  | 1.0 | 0.9 |
| <b>N 1193</b>  | 1.7 | 2.2  | 1.9 | 2.5 |
| <b>N 1199</b>  | 1.1 | 1.2  | 1.5 | 1.3 |
| <b>SAI 363</b> | 2.0 | 3.4  | 1.1 | 1.5 |
| <b>SAI 366</b> | 6.3 | 15.3 | 2.4 | 1.2 |
| <b>SAI 362</b> | 9.1 | 23.0 | 1.6 | 1.1 |
| <b>SAI 365</b> | 4.9 | 11.7 | 2.7 | 1.0 |
| <b>SAI 120</b> | 1.0 | 1.1  | 1.1 | 1.3 |
| <b>SAI 458</b> | 2.3 | 3.8  | 1.1 | 1.3 |
| <b>SAI 459</b> | 1.0 | 1.0  | 1.0 | 0.8 |
| <b>SAI 487</b> | 1.0 | 1.0  | 1.0 | 0.7 |
| <b>N 1131</b>  | 1.0 | 1.0  | 1.0 | 1.2 |
| <b>MID 323</b> | 1.0 | 1.1  | 1.2 | 2.4 |
| <b>SAI 379</b> | 1.0 | 1.2  | 1.0 | 0.8 |
| <b>SAI 367</b> | 1.2 | 1.1  | 1.1 | 1.3 |
| <b>M 2738d</b> | 1.0 | 1.4  | 1.8 | 1.1 |
| <b>ZS 260</b>  | 1.4 | 2.1  | 2.0 | 1.1 |
| <b>N 871a</b>  | 1.7 | 3.2  | 4.4 | 3.7 |
| <b>N 901</b>   | 0.9 | 0.8  | 0.9 | 1.2 |

**Table S2.13.** Results of interaction with nanoFAST-R52Q

| <b>Cmpd</b>       | <b>Enhancement</b> |            |            |            |
|-------------------|--------------------|------------|------------|------------|
|                   | <b>430</b>         | <b>480</b> | <b>530</b> | <b>580</b> |
| <b>HBR-DOM2</b>   | 10.0               | 86.3       | 222.0      | 2.9        |
| <b>HBR-2,5-DM</b> | 1.6                | 3.8        | 1.7        | 1.2        |
| <b>HMBR</b>       | 1.2                | 1.5        | 1.1        | 1.2        |
| <b>HBR-DOM</b>    | 1.0                | 1.2        | 1.8        | 1.1        |
| <b>N 871b</b>     | 1.0                | 1.2        | 1.6        | 1.5        |
| <b>MID 145</b>    | 1.0                | 1.0        | 1.3        | 0.9        |
| <b>N 1052</b>     | 1.0                | 1.1        | 1.2        | 1.3        |
| <b>N 1184</b>     | 1.0                | 1.2        | 1.5        | 1.1        |
| <b>N 1122</b>     | 1.0                | 1.2        | 1.1        | 0.8        |
| <b>N 1049</b>     | 1.0                | 1.1        | 1.2        | 1.2        |
| <b>N 1123</b>     | 1.0                | 1.0        | 1.1        | 1.1        |
| <b>N 1139</b>     | 1.0                | 1.1        | 1.8        | 2.5        |
| <b>N 1118</b>     | 1.1                | 1.2        | 1.2        | 0.9        |
| <b>SAI 112</b>    | 1.5                | 2.4        | 1.5        | 1.0        |
| <b>N 1135</b>     | 1.0                | 1.0        | 1.1        | 0.9        |
| <b>SAI 118</b>    | 1.1                | 1.2        | 1.1        | 1.0        |
| <b>N 1124</b>     | 1.0                | 1.0        | 1.1        | 1.2        |
| <b>SAI 122</b>    | 3.4                | 4.4        | 1.2        | 1.3        |
| <b>N 1142</b>     | 1.0                | 1.1        | 1.1        | 1.3        |
| <b>SAI 199</b>    | 4.5                | 5.3        | 1.1        | 0.9        |
| <b>N 967</b>      | 1.0                | 1.1        | 1.4        | 1.8        |
| <b>N 1039</b>     | 1.0                | 1.2        | 1.6        | 1.3        |
| <b>N 1202</b>     | 1.0                | 1.2        | 1.6        | 1.5        |
| <b>N 960b</b>     | 1.0                | 1.1        | 1.4        | 1.9        |
| <b>N 1036</b>     | 1.0                | 1.0        | 1.1        | 1.6        |
| <b>SAI 117</b>    | 1.2                | 1.5        | 1.1        | 1.0        |
| <b>N 1042</b>     | 1.0                | 1.0        | 1.0        | 1.0        |
| <b>SAI 121</b>    | 1.1                | 1.3        | 1.1        | 1.0        |
| <b>MID 147</b>    | 1.2                | 1.6        | 2.4        | 2.4        |
| <b>SAI 125</b>    | 1.3                | 1.6        | 1.1        | 1.0        |
| <b>MID 151</b>    | 1.0                | 1.1        | 1.2        | 1.4        |
| <b>N 865</b>      | 1.0                | 1.0        | 1.0        | 1.0        |
| <b>MID 153</b>    | 1.0                | 1.0        | 1.1        | 1.2        |
| <b>MID 343</b>    | 1.0                | 1.1        | 1.6        | 3.3        |
| <b>M 3007a</b>    | 1.0                | 1.0        | 1.1        | 1.0        |
| <b>MID 367</b>    | 1.0                | 1.0        | 1.2        | 1.4        |
| <b>N 1048</b>     | 1.0                | 1.3        | 2.3        | 3.7        |
| <b>N 979</b>      | 1.0                | 1.0        | 1.0        | 1.0        |
| <b>N 971</b>      | 1.0                | 1.0        | 1.0        | 1.0        |
| <b>N 973</b>      | 1.0                | 1.1        | 1.1        | 1.3        |
| <b>N 976</b>      | 1.0                | 1.0        | 1.0        | 1.4        |
| <b>N 980</b>      | 1.0                | 1.0        | 1.0        | 0.9        |
| <b>N 1205</b>     | 1.4                | 1.8        | 2.6        | 2.1        |
| <b>N 960a</b>     | 1.0                | 1.1        | 1.2        | 1.3        |

|                |      |      |     |     |
|----------------|------|------|-----|-----|
| <b>ZS 331</b>  | 1.1  | 1.2  | 1.5 | 1.8 |
| <b>N 1027</b>  | 1.0  | 1.0  | 1.0 | 0.8 |
| <b>M 2766</b>  | 1.0  | 1.2  | 1.6 | 1.6 |
| <b>ZS 362</b>  | 1.0  | 1.0  | 1.0 | 0.8 |
| <b>N 1179</b>  | 1.0  | 1.0  | 1.0 | 1.1 |
| <b>N 1180</b>  | 1.0  | 1.0  | 1.1 | 1.3 |
| <b>N 1204</b>  | 1.2  | 1.6  | 1.9 | 1.6 |
| <b>N 1206</b>  | 1.0  | 1.0  | 1.1 | 1.0 |
| <b>ZS 309</b>  | 1.2  | 1.5  | 1.9 | 1.9 |
| <b>ZS 316</b>  | 1.0  | 1.0  | 1.0 | 1.0 |
| <b>ZS 319</b>  | 1.0  | 1.0  | 1.0 | 1.0 |
| <b>ZS 325</b>  | 1.0  | 1.0  | 1.1 | 1.0 |
| <b>MID 213</b> | 1.0  | 1.1  | 1.2 | 1.0 |
| <b>M 2767</b>  | 1.3  | 2.5  | 4.5 | 5.4 |
| <b>M 2876</b>  | 1.0  | 1.0  | 1.0 | 1.0 |
| <b>SH 16</b>   | 1.1  | 1.1  | 1.1 | 1.0 |
| <b>SAI 472</b> | 1.2  | 1.5  | 1.3 | 1.2 |
| <b>SAI 499</b> | 1.1  | 1.1  | 1.0 | 0.9 |
| <b>SAI 503</b> | 1.0  | 1.0  | 1.0 | 0.9 |
| <b>SAI 474</b> | 1.0  | 1.0  | 1.0 | 1.4 |
| <b>SAI 477</b> | 3.7  | 2.5  | 1.1 | 1.1 |
| <b>N 1196</b>  | 1.0  | 1.0  | 1.1 | 1.0 |
| <b>N 1197</b>  | 1.0  | 1.0  | 1.1 | 1.2 |
| <b>SAI 127</b> | 1.3  | 2.0  | 1.2 | 0.8 |
| <b>N 1056</b>  | 1.0  | 1.0  | 1.1 | 1.2 |
| <b>N 1068</b>  | 1.0  | 1.0  | 1.0 | 1.0 |
| <b>N 1069</b>  | 1.0  | 1.1  | 1.3 | 0.9 |
| <b>A9</b>      | 1.0  | 1.0  | 1.0 | 1.1 |
| <b>N 1198</b>  | 1.0  | 1.0  | 1.1 | 1.1 |
| <b>N 1193</b>  | 1.6  | 2.1  | 2.5 | 2.7 |
| <b>N 1199</b>  | 1.0  | 1.1  | 1.3 | 1.3 |
| <b>SAI 363</b> | 6.8  | 14.8 | 1.1 | 1.3 |
| <b>SAI 366</b> | 11.4 | 30.1 | 2.4 | 1.0 |
| <b>SAI 362</b> | 3.7  | 9.9  | 1.3 | 0.7 |
| <b>SAI 365</b> | 9.3  | 24.1 | 2.6 | 1.3 |
| <b>SAI 120</b> | 1.0  | 1.1  | 1.1 | 0.9 |
| <b>SAI 458</b> | 1.3  | 1.9  | 1.0 | 0.9 |
| <b>SAI 459</b> | 1.0  | 1.0  | 1.0 | 1.2 |
| <b>SAI 487</b> | 1.0  | 1.0  | 1.0 | 0.9 |
| <b>N 1131</b>  | 1.0  | 1.0  | 1.0 | 1.1 |
| <b>MID 323</b> | 1.0  | 1.1  | 1.3 | 1.8 |
| <b>SAI 379</b> | 1.0  | 1.2  | 1.1 | 0.9 |
| <b>SAI 367</b> | 1.2  | 1.1  | 1.0 | 1.0 |
| <b>M 2738d</b> | 1.0  | 1.5  | 2.0 | 1.3 |
| <b>ZS 260</b>  | 1.5  | 2.1  | 2.0 | 1.3 |
| <b>N 871a</b>  | 1.4  | 2.2  | 2.6 | 1.7 |
| <b>N 901</b>   | 1.0  | 1.0  | 1.2 | 1.5 |

**Table S2.14.** Results of interaction with nanoFAST-R52I

| <b>Cmpd</b>       | <b>Enhancement</b> |            |            |            |
|-------------------|--------------------|------------|------------|------------|
|                   | <b>430</b>         | <b>480</b> | <b>530</b> | <b>580</b> |
| <b>HBR-DOM2</b>   | 7.7                | 72.0       | 218.9      | 4.2        |
| <b>HBR-2,5-DM</b> | 1.4                | 2.8        | 1.6        | 0.9        |
| <b>HMBR</b>       | 1.2                | 1.5        | 1.0        | 1.2        |
| <b>HBR-DOM</b>    | 1.1                | 1.2        | 2.0        | 1.5        |
| <b>N 871b</b>     | 1.0                | 1.1        | 1.4        | 1.6        |
| <b>MID 145</b>    | 1.1                | 1.2        | 1.3        | 1.3        |
| <b>N 1052</b>     | 1.1                | 1.4        | 1.6        | 1.5        |
| <b>N 1184</b>     | 1.0                | 1.1        | 1.4        | 1.1        |
| <b>N 1122</b>     | 1.1                | 1.2        | 1.1        | 1.0        |
| <b>N 1049</b>     | 1.1                | 1.2        | 1.4        | 1.2        |
| <b>N 1123</b>     | 1.0                | 1.0        | 1.0        | 1.1        |
| <b>N 1139</b>     | 1.0                | 1.1        | 1.7        | 2.8        |
| <b>N 1118</b>     | 1.1                | 1.2        | 1.1        | 1.0        |
| <b>SAI 112</b>    | 1.3                | 2.2        | 1.5        | 1.1        |
| <b>N 1135</b>     | 1.0                | 1.0        | 1.1        | 1.2        |
| <b>SAI 118</b>    | 1.0                | 1.1        | 1.0        | 0.8        |
| <b>N 1124</b>     | 1.0                | 1.0        | 1.1        | 1.4        |
| <b>SAI 122</b>    | 3.0                | 3.9        | 1.1        | 1.4        |
| <b>N 1142</b>     | 1.1                | 1.2        | 1.5        | 1.3        |
| <b>SAI 199</b>    | 3.7                | 4.8        | 1.0        | 0.9        |
| <b>N 967</b>      | 1.0                | 1.2        | 1.7        | 2.6        |
| <b>N 1039</b>     | 1.1                | 1.3        | 1.5        | 1.5        |
| <b>N 1202</b>     | 1.0                | 1.1        | 1.5        | 1.7        |
| <b>N 960b</b>     | 1.0                | 1.1        | 1.4        | 2.1        |
| <b>N 1036</b>     | 1.0                | 1.0        | 1.0        | 1.2        |
| <b>SAI 117</b>    | 1.1                | 1.4        | 1.0        | 1.0        |
| <b>N 1042</b>     | 1.0                | 1.0        | 1.0        | 0.7        |
| <b>SAI 121</b>    | 1.1                | 1.2        | 1.2        | 1.0        |
| <b>MID 147</b>    | 1.4                | 2.5        | 3.2        | 2.3        |
| <b>SAI 125</b>    | 1.1                | 1.4        | 1.1        | 1.0        |
| <b>MID 151</b>    | 1.0                | 1.0        | 1.1        | 1.3        |
| <b>N 865</b>      | 1.0                | 1.0        | 1.0        | 1.0        |
| <b>MID 153</b>    | 1.0                | 1.0        | 1.0        | 1.1        |
| <b>MID 343</b>    | 1.0                | 1.0        | 1.3        | 2.3        |
| <b>M 3007a</b>    | 1.0                | 1.0        | 1.1        | 0.9        |
| <b>MID 367</b>    | 1.0                | 1.0        | 1.1        | 1.6        |
| <b>N 1048</b>     | 1.1                | 1.2        | 1.9        | 3.3        |
| <b>N 979</b>      | 1.0                | 1.0        | 1.0        | 1.3        |
| <b>N 971</b>      | 1.0                | 1.0        | 1.0        | 1.0        |
| <b>N 973</b>      | 1.0                | 1.1        | 1.1        | 1.3        |
| <b>N 976</b>      | 1.0                | 1.0        | 1.0        | 0.9        |
| <b>N 980</b>      | 1.0                | 1.0        | 1.0        | 0.9        |
| <b>N 1205</b>     | 1.2                | 1.6        | 2.3        | 2.2        |
| <b>N 960a</b>     | 1.0                | 1.0        | 1.1        | 0.9        |



|                |     |      |     |     |
|----------------|-----|------|-----|-----|
| <b>ZS 331</b>  | 1.0 | 1.1  | 1.3 | 1.5 |
| <b>N 1027</b>  | 1.0 | 1.0  | 1.0 | 1.1 |
| <b>M 2766</b>  | 1.0 | 1.2  | 1.5 | 1.5 |
| <b>ZS 362</b>  | 1.0 | 1.0  | 1.0 | 0.8 |
| <b>N 1179</b>  | 1.0 | 1.0  | 1.0 | 1.0 |
| <b>N 1180</b>  | 1.0 | 1.0  | 1.0 | 1.1 |
| <b>N 1204</b>  | 1.1 | 1.2  | 1.5 | 1.2 |
| <b>N 1206</b>  | 1.0 | 0.9  | 1.0 | 1.0 |
| <b>ZS 309</b>  | 1.1 | 1.2  | 1.6 | 1.7 |
| <b>ZS 316</b>  | 1.0 | 1.0  | 0.9 | 0.9 |
| <b>ZS 319</b>  | 1.0 | 1.0  | 1.0 | 1.0 |
| <b>ZS 325</b>  | 1.0 | 1.0  | 1.0 | 1.1 |
| <b>MID 213</b> | 1.0 | 1.0  | 1.0 | 1.0 |
| <b>M 2767</b>  | 1.3 | 2.5  | 4.7 | 5.7 |
| <b>M 2876</b>  | 1.0 | 1.0  | 1.0 | 1.0 |
| <b>SH 16</b>   | 1.0 | 1.0  | 1.1 | 1.1 |
| <b>SAI 472</b> | 1.1 | 1.3  | 1.2 | 1.0 |
| <b>SAI 499</b> | 1.0 | 1.0  | 1.0 | 0.9 |
| <b>SAI 503</b> | 1.0 | 1.0  | 1.0 | 1.1 |
| <b>SAI 474</b> | 1.0 | 1.0  | 1.0 | 1.1 |
| <b>SAI 477</b> | 3.1 | 2.6  | 1.0 | 1.2 |
| <b>N 1196</b>  | 1.0 | 1.0  | 1.0 | 0.9 |
| <b>N 1197</b>  | 1.0 | 1.0  | 1.0 | 1.0 |
| <b>SAI 127</b> | 1.2 | 1.9  | 1.3 | 1.1 |
| <b>N 1056</b>  | 1.0 | 1.0  | 1.1 | 1.4 |
| <b>N 1068</b>  | 1.0 | 1.0  | 1.0 | 1.0 |
| <b>N 1069</b>  | 1.0 | 1.0  | 1.1 | 0.9 |
| <b>A9</b>      | 1.0 | 0.9  | 0.9 | 1.0 |
| <b>N 1198</b>  | 1.0 | 1.0  | 1.0 | 1.1 |
| <b>N 1193</b>  | 1.2 | 1.4  | 1.6 | 2.0 |
| <b>N 1199</b>  | 1.0 | 1.1  | 1.2 | 1.1 |
| <b>SAI 363</b> | 4.8 | 13.5 | 1.2 | 1.2 |
| <b>SAI 366</b> | 9.2 | 24.8 | 3.3 | 0.8 |
| <b>SAI 362</b> | 3.5 | 11.4 | 1.5 | 0.9 |
| <b>SAI 365</b> | 8.6 | 23.8 | 3.7 | 1.1 |
| <b>SAI 120</b> | 1.1 | 1.1  | 1.1 | 1.0 |
| <b>SAI 458</b> | 1.2 | 1.8  | 1.0 | 1.0 |
| <b>SAI 459</b> | 1.0 | 1.0  | 1.0 | 1.1 |
| <b>SAI 487</b> | 1.0 | 1.0  | 1.0 | 1.1 |
| <b>N 1131</b>  | 1.0 | 1.0  | 1.0 | 0.9 |
| <b>MID 323</b> | 1.0 | 1.1  | 1.4 | 2.0 |
| <b>SAI 379</b> | 0.9 | 1.1  | 1.0 | 1.1 |
| <b>SAI 367</b> | 1.3 | 1.1  | 1.0 | 1.0 |
| <b>M 2738d</b> | 1.1 | 2.2  | 3.0 | 1.2 |
| <b>ZS 260</b>  | 1.2 | 1.6  | 1.6 | 1.2 |
| <b>N 871a</b>  | 1.3 | 1.9  | 1.9 | 1.4 |
| <b>N 901</b>   | 1.0 | 1.0  | 1.1 | 1.4 |

**Table S2.15.** Results of interaction with nanoFAST-R52A

| <b>Cmpd</b>       | <b>Enhancement</b> |            |            |            |
|-------------------|--------------------|------------|------------|------------|
|                   | <b>430</b>         | <b>480</b> | <b>530</b> | <b>580</b> |
| <b>HBR-DOM2</b>   | 11.0               | 108.9      | >333.5     | 3.0        |
| <b>HBR-2,5-DM</b> | 1.3                | 3.1        | 2.3        | 1.2        |
| <b>HMBR</b>       | 1.1                | 1.3        | 1.0        | 1.1        |
| <b>HBR-DOM</b>    | 1.0                | 1.5        | 3.5        | 1.4        |
| <b>N 871b</b>     | 1.0                | 1.1        | 1.3        | 1.3        |
| <b>MID 145</b>    | 1.1                | 1.3        | 1.4        | 1.0        |
| <b>N 1052</b>     | 1.1                | 1.4        | 1.5        | 1.1        |
| <b>N 1184</b>     | 1.0                | 1.1        | 1.3        | 1.1        |
| <b>N 1122</b>     | 1.1                | 1.2        | 1.2        | 1.1        |
| <b>N 1049</b>     | 1.0                | 1.2        | 1.4        | 1.2        |
| <b>N 1123</b>     | 1.0                | 1.0        | 1.0        | 1.1        |
| <b>N 1139</b>     | 1.0                | 1.1        | 2.0        | 2.9        |
| <b>N 1118</b>     | 1.1                | 1.3        | 1.3        | 1.3        |
| <b>SAI 112</b>    | 1.5                | 3.2        | 1.5        | 1.0        |
| <b>N 1135</b>     | 1.0                | 1.0        | 1.0        | 1.1        |
| <b>SAI 118</b>    | 1.0                | 1.5        | 1.1        | 0.9        |
| <b>N 1124</b>     | 1.0                | 1.0        | 1.0        | 1.0        |
| <b>SAI 122</b>    | 1.9                | 2.6        | 1.1        | 1.1        |
| <b>N 1142</b>     | 1.0                | 1.2        | 1.3        | 1.2        |
| <b>SAI 199</b>    | 2.0                | 2.9        | 1.0        | 0.9        |
| <b>N 967</b>      | 1.0                | 1.0        | 1.2        | 1.2        |
| <b>N 1039</b>     | 1.1                | 1.3        | 1.6        | 1.2        |
| <b>N 1202</b>     | 1.0                | 1.0        | 1.3        | 1.2        |
| <b>N 960b</b>     | 1.0                | 1.1        | 1.3        | 1.6        |
| <b>N 1036</b>     | 1.0                | 1.1        | 1.0        | 1.0        |
| <b>SAI 117</b>    | 1.3                | 1.1        | 0.3        | 0.6        |
| <b>N 1042</b>     | 1.0                | 1.0        | 1.1        | 1.2        |
| <b>SAI 121</b>    | 1.1                | 1.3        | 1.1        | 1.1        |
| <b>MID 147</b>    | 1.5                | 2.7        | 3.8        | 2.1        |
| <b>SAI 125</b>    | 1.2                | 1.9        | 1.1        | 1.2        |
| <b>MID 151</b>    | 1.0                | 1.0        | 1.0        | 1.1        |
| <b>N 865</b>      | 1.0                | 1.0        | 1.0        | 1.0        |
| <b>MID 153</b>    | 1.0                | 0.9        | 1.0        | 1.0        |
| <b>MID 343</b>    | 1.0                | 1.1        | 1.4        | 2.1        |
| <b>M 3007a</b>    | 1.0                | 1.0        | 1.1        | 1.2        |
| <b>MID 367</b>    | 1.0                | 1.0        | 1.1        | 1.3        |
| <b>N 1048</b>     | 1.1                | 1.4        | 3.9        | 7.5        |
| <b>N 979</b>      | 1.0                | 1.0        | 1.0        | 1.0        |
| <b>N 971</b>      | 1.0                | 1.0        | 1.0        | 1.1        |
| <b>N 973</b>      | 1.0                | 1.1        | 1.1        | 1.1        |
| <b>N 976</b>      | 1.0                | 1.0        | 1.0        | 0.9        |
| <b>N 980</b>      | 1.0                | 1.0        | 1.0        | 0.9        |
| <b>N 1205</b>     | 1.4                | 1.7        | 2.1        | 1.6        |
| <b>N 960a</b>     | 1.0                | 1.0        | 1.1        | 1.1        |

|                |     |      |     |     |
|----------------|-----|------|-----|-----|
| <b>ZS 331</b>  | 1.0 | 1.2  | 1.3 | 1.2 |
| <b>N 1027</b>  | 1.0 | 1.0  | 1.0 | 1.0 |
| <b>M 2766</b>  | 1.0 | 1.2  | 1.3 | 1.2 |
| <b>ZS 362</b>  | 1.0 | 1.0  | 1.0 | 1.1 |
| <b>N 1179</b>  | 0.9 | 0.9  | 1.0 | 1.1 |
| <b>N 1180</b>  | 0.9 | 0.9  | 1.0 | 1.1 |
| <b>N 1204</b>  | 1.1 | 1.1  | 1.3 | 1.1 |
| <b>N 1206</b>  | 0.9 | 0.9  | 1.0 | 1.1 |
| <b>ZS 309</b>  | 1.0 | 1.2  | 1.7 | 1.2 |
| <b>ZS 316</b>  | 0.9 | 0.9  | 1.0 | 1.0 |
| <b>ZS 319</b>  | 0.9 | 0.9  | 0.9 | 1.2 |
| <b>ZS 325</b>  | 0.9 | 0.9  | 1.1 | 0.8 |
| <b>MID 213</b> | 0.9 | 0.9  | 1.0 | 0.9 |
| <b>M 2767</b>  | 1.1 | 1.7  | 4.7 | 5.5 |
| <b>M 2876</b>  | 0.9 | 0.9  | 1.0 | 0.8 |
| <b>SH 16</b>   | 1.0 | 0.9  | 1.0 | 0.9 |
| <b>SAI 472</b> | 1.1 | 1.3  | 1.5 | 1.1 |
| <b>SAI 499</b> | 0.9 | 0.9  | 1.0 | 1.4 |
| <b>SAI 503</b> | 0.9 | 0.9  | 0.9 | 0.7 |
| <b>SAI 474</b> | 0.9 | 0.9  | 1.0 | 0.8 |
| <b>SAI 477</b> | 4.4 | 2.6  | 1.0 | 0.9 |
| <b>N 1196</b>  | 0.9 | 0.9  | 1.0 | 1.0 |
| <b>N 1197</b>  | 1.0 | 0.9  | 1.1 | 1.2 |
| <b>SAI 127</b> | 1.2 | 1.4  | 1.1 | 1.0 |
| <b>N 1056</b>  | 0.9 | 0.9  | 1.1 | 0.9 |
| <b>N 1068</b>  | 0.9 | 0.9  | 1.0 | 1.1 |
| <b>N 1069</b>  | 0.9 | 0.9  | 1.2 | 1.1 |
| <b>A9</b>      | 0.9 | 0.9  | 0.9 | 0.8 |
| <b>N 1198</b>  | 0.9 | 0.9  | 1.0 | 1.0 |
| <b>N 1193</b>  | 1.4 | 1.6  | 2.2 | 2.2 |
| <b>N 1199</b>  | 1.0 | 1.0  | 1.4 | 1.0 |
| <b>SAI 363</b> | 2.1 | 3.5  | 1.1 | 1.1 |
| <b>SAI 366</b> | 8.8 | 20.4 | 2.8 | 1.0 |
| <b>SAI 362</b> | 1.4 | 2.4  | 1.3 | 1.1 |
| <b>SAI 365</b> | 9.8 | 23.5 | 3.5 | 0.8 |
| <b>SAI 120</b> | 1.0 | 1.0  | 1.1 | 1.2 |
| <b>SAI 458</b> | 1.0 | 1.0  | 1.0 | 1.0 |
| <b>SAI 459</b> | 0.9 | 0.9  | 1.0 | 1.1 |
| <b>SAI 487</b> | 0.9 | 0.9  | 1.0 | 1.0 |
| <b>N 1131</b>  | 1.0 | 0.9  | 1.0 | 0.9 |
| <b>MID 323</b> | 1.0 | 1.0  | 1.2 | 1.5 |
| <b>SAI 379</b> | 1.0 | 1.1  | 1.0 | 1.0 |
| <b>SAI 367</b> | 1.1 | 1.0  | 1.0 | 0.9 |
| <b>M 2738d</b> | 1.0 | 1.4  | 2.3 | 1.1 |
| <b>ZS 260</b>  | 1.3 | 1.9  | 2.1 | 1.2 |
| <b>N 871a</b>  | 1.3 | 1.9  | 2.3 | 1.4 |
| <b>N 901</b>   | 1.0 | 1.0  | 1.1 | 1.3 |

**Table S2.16.** Results of interaction with nanoFAST-R52Y

| <b>Cmpd</b>       | <b>Enhancement</b> |            |            |            |
|-------------------|--------------------|------------|------------|------------|
|                   | <b>430</b>         | <b>480</b> | <b>530</b> | <b>580</b> |
| <b>HBR-DOM2</b>   | 4.2                | 33.2       | 81.5       | 1.6        |
| <b>HBR-2,5-DM</b> | 1.1                | 1.8        | 1.3        | 1.0        |
| <b>HMBR</b>       | 1.1                | 1.2        | 1.0        | 0.9        |
| <b>HBR-DOM</b>    | 1.0                | 1.1        | 1.3        | 1.3        |
| <b>N 871b</b>     | 1.1                | 1.3        | 1.8        | 2.2        |
| <b>MID 145</b>    | 1.1                | 1.4        | 1.6        | 1.2        |
| <b>N 1052</b>     | 1.1                | 1.4        | 1.7        | 1.4        |
| <b>N 1184</b>     | 1.0                | 1.1        | 1.6        | 1.2        |
| <b>N 1122</b>     | 1.1                | 1.2        | 1.2        | 1.5        |
| <b>N 1049</b>     | 1.1                | 1.3        | 1.6        | 1.4        |
| <b>N 1123</b>     | 1.0                | 1.0        | 1.0        | 1.0        |
| <b>N 1139</b>     | 1.0                | 1.1        | 1.8        | 3.0        |
| <b>N 1118</b>     | 1.1                | 1.2        | 1.2        | 1.1        |
| <b>SAI 112</b>    | 1.2                | 1.7        | 1.4        | 1.0        |
| <b>N 1135</b>     | 1.0                | 1.0        | 1.1        | 1.1        |
| <b>SAI 118</b>    | 0.9                | 1.0        | 1.0        | 1.0        |
| <b>N 1124</b>     | 1.0                | 1.0        | 1.0        | 1.2        |
| <b>SAI 122</b>    | 2.7                | 3.2        | 1.1        | 1.2        |
| <b>N 1142</b>     | 1.1                | 1.2        | 1.3        | 1.2        |
| <b>SAI 199</b>    | 2.6                | 3.1        | 1.0        | 1.0        |
| <b>N 967</b>      | 1.0                | 1.1        | 1.2        | 1.6        |
| <b>N 1039</b>     | 1.1                | 1.6        | 2.3        | 1.5        |
| <b>N 1202</b>     | 1.0                | 1.2        | 2.0        | 2.0        |
| <b>N 960b</b>     | 1.0                | 1.2        | 1.7        | 2.8        |
| <b>N 1036</b>     | 1.0                | 1.0        | 1.0        | 1.2        |
| <b>SAI 117</b>    | 1.0                | 1.2        | 1.0        | 0.8        |
| <b>N 1042</b>     | 1.0                | 1.0        | 1.0        | 1.0        |
| <b>SAI 121</b>    | 1.0                | 1.1        | 1.1        | 1.1        |
| <b>MID 147</b>    | 1.5                | 2.7        | 4.1        | 2.5        |
| <b>SAI 125</b>    | 1.0                | 1.1        | 1.0        | 1.0        |
| <b>MID 151</b>    | 1.0                | 1.0        | 1.0        | 1.2        |
| <b>N 865</b>      | 1.0                | 1.0        | 1.0        | 1.0        |
| <b>MID 153</b>    | 1.0                | 1.0        | 1.1        | 1.1        |
| <b>MID 343</b>    | 1.0                | 1.1        | 1.3        | 1.8        |
| <b>M 3007a</b>    | 1.0                | 1.0        | 1.1        | 1.1        |
| <b>MID 367</b>    | 1.0                | 1.0        | 1.1        | 1.2        |
| <b>N 1048</b>     | 1.0                | 1.1        | 1.2        | 1.6        |
| <b>N 979</b>      | 1.0                | 1.0        | 1.0        | 1.0        |
| <b>N 971</b>      | 1.0                | 1.0        | 1.0        | 1.1        |
| <b>N 973</b>      | 1.1                | 1.1        | 1.1        | 1.0        |
| <b>N 976</b>      | 1.0                | 1.0        | 1.0        | 1.0        |
| <b>N 980</b>      | 1.0                | 1.0        | 1.0        | 1.1        |
| <b>N 1205</b>     | 1.4                | 2.0        | 3.0        | 1.6        |
| <b>N 960a</b>     | 1.0                | 1.1        | 1.1        | 1.1        |

|                |     |      |     |     |
|----------------|-----|------|-----|-----|
| <b>ZS 331</b>  | 1.1 | 1.2  | 1.4 | 1.4 |
| <b>N 1027</b>  | 1.0 | 1.0  | 1.0 | 1.0 |
| <b>M 2766</b>  | 1.1 | 1.2  | 1.7 | 1.5 |
| <b>ZS 362</b>  | 1.0 | 1.0  | 1.0 | 1.0 |
| <b>N 1179</b>  | 1.0 | 1.0  | 1.0 | 1.1 |
| <b>N 1180</b>  | 1.0 | 1.0  | 1.0 | 1.1 |
| <b>N 1204</b>  | 1.2 | 1.6  | 2.1 | 1.4 |
| <b>N 1206</b>  | 1.0 | 0.9  | 1.0 | 1.1 |
| <b>ZS 309</b>  | 1.1 | 1.3  | 1.7 | 1.3 |
| <b>ZS 316</b>  | 1.0 | 1.0  | 1.0 | 0.9 |
| <b>ZS 319</b>  | 1.0 | 0.9  | 0.9 | 0.9 |
| <b>ZS 325</b>  | 1.0 | 1.0  | 1.0 | 1.1 |
| <b>MID 213</b> | 1.0 | 1.0  | 1.1 | 1.2 |
| <b>M 2767</b>  | 1.2 | 1.7  | 3.0 | 3.7 |
| <b>M 2876</b>  | 1.0 | 1.0  | 1.0 | 1.0 |
| <b>SH 16</b>   | 1.1 | 1.1  | 1.1 | 1.0 |
| <b>SAI 472</b> | 1.1 | 1.2  | 1.2 | 0.9 |
| <b>SAI 499</b> | 1.0 | 1.0  | 1.0 | 1.0 |
| <b>SAI 503</b> | 1.0 | 1.0  | 1.0 | 1.0 |
| <b>SAI 474</b> | 1.0 | 1.0  | 1.0 | 1.0 |
| <b>SAI 477</b> | 1.6 | 1.3  | 1.0 | 0.9 |
| <b>N 1196</b>  | 1.0 | 1.0  | 1.0 | 0.9 |
| <b>N 1197</b>  | 1.0 | 1.0  | 1.1 | 1.0 |
| <b>SAI 127</b> | 1.1 | 1.3  | 1.2 | 1.2 |
| <b>N 1056</b>  | 1.0 | 1.0  | 1.0 | 1.0 |
| <b>N 1068</b>  | 1.0 | 1.0  | 1.0 | 1.1 |
| <b>N 1069</b>  | 1.0 | 1.0  | 1.2 | 1.0 |
| <b>A9</b>      | 1.0 | 1.0  | 1.0 | 0.9 |
| <b>N 1198</b>  | 1.0 | 1.0  | 1.0 | 0.9 |
| <b>N 1193</b>  | 1.7 | 2.5  | 3.1 | 3.5 |
| <b>N 1199</b>  | 1.1 | 1.2  | 1.4 | 1.0 |
| <b>SAI 363</b> | 1.5 | 2.3  | 1.1 | 1.0 |
| <b>SAI 366</b> | 6.1 | 15.4 | 2.5 | 0.9 |
| <b>SAI 362</b> | 2.5 | 6.0  | 1.2 | 1.0 |
| <b>SAI 365</b> | 5.9 | 15.5 | 3.0 | 0.9 |
| <b>SAI 120</b> | 1.0 | 1.1  | 1.1 | 0.9 |
| <b>SAI 458</b> | 1.1 | 1.4  | 1.0 | 1.1 |
| <b>SAI 459</b> | 1.0 | 1.0  | 0.9 | 0.9 |
| <b>SAI 487</b> | 1.0 | 1.0  | 1.0 | 1.0 |
| <b>N 1131</b>  | 1.0 | 1.0  | 1.0 | 0.9 |
| <b>MID 323</b> | 1.0 | 1.0  | 1.2 | 1.5 |
| <b>SAI 379</b> | 1.0 | 1.1  | 1.0 | 1.0 |
| <b>SAI 367</b> | 1.3 | 1.1  | 1.0 | 1.0 |
| <b>M 2738d</b> | 1.0 | 1.1  | 1.3 | 1.0 |
| <b>ZS 260</b>  | 1.5 | 2.4  | 2.9 | 1.8 |
| <b>N 871a</b>  | 1.3 | 2.0  | 2.5 | 1.8 |
| <b>N 901</b>   | 1.0 | 1.0  | 1.1 | 1.4 |

**Table S2.17.** Results of interaction with nanoFAST-R52T

| <b>Cmpd</b>       | <b>Enhancement</b> |            |            |            |
|-------------------|--------------------|------------|------------|------------|
|                   | <b>430</b>         | <b>480</b> | <b>530</b> | <b>580</b> |
| <b>HBR-DOM2</b>   | 10.5               | 96.0       | 249.1      | 3.4        |
| <b>HBR-2,5-DM</b> | 1.3                | 2.3        | 1.4        | 1.0        |
| <b>HMBR</b>       | 1.1                | 1.2        | 1.0        | 1.1        |
| <b>HBR-DOM</b>    | 1.1                | 1.4        | 2.3        | 1.6        |
| <b>N 871b</b>     | 1.0                | 1.1        | 1.2        | 1.4        |
| <b>MID 145</b>    | 1.1                | 1.3        | 1.3        | 1.2        |
| <b>N 1052</b>     | 1.1                | 1.5        | 1.9        | 1.4        |
| <b>N 1184</b>     | 1.0                | 1.0        | 1.0        | 1.0        |
| <b>N 1122</b>     | 1.1                | 1.2        | 1.2        | 1.1        |
| <b>N 1049</b>     | 1.1                | 1.2        | 1.4        | 1.3        |
| <b>N 1123</b>     | 1.0                | 1.0        | 1.0        | 1.0        |
| <b>N 1139</b>     | 1.0                | 1.2        | 2.0        | 3.3        |
| <b>N 1118</b>     | 1.1                | 1.3        | 1.3        | 1.3        |
| <b>SAI 112</b>    | 1.3                | 2.1        | 1.4        | 1.1        |
| <b>N 1135</b>     | 1.0                | 1.0        | 1.0        | 1.2        |
| <b>SAI 118</b>    | 1.0                | 1.0        | 1.0        | 1.1        |
| <b>N 1124</b>     | 1.0                | 1.0        | 1.0        | 1.1        |
| <b>SAI 122</b>    | 2.0                | 2.5        | 1.1        | 0.9        |
| <b>N 1142</b>     | 1.1                | 1.2        | 1.3        | 1.3        |
| <b>SAI 199</b>    | 2.0                | 2.5        | 1.0        | 0.9        |
| <b>N 967</b>      | 1.0                | 1.1        | 1.3        | 1.3        |
| <b>N 1039</b>     | 1.1                | 1.3        | 1.6        | 1.4        |
| <b>N 1202</b>     | 1.0                | 1.0        | 1.2        | 1.2        |
| <b>N 960b</b>     | 1.0                | 1.1        | 1.4        | 1.7        |
| <b>N 1036</b>     | 1.0                | 1.0        | 1.0        | 1.1        |
| <b>SAI 117</b>    | 1.2                | 1.4        | 1.1        | 0.9        |
| <b>N 1042</b>     | 1.0                | 1.0        | 1.0        | 1.0        |
| <b>SAI 121</b>    | 1.0                | 1.1        | 1.1        | 1.0        |
| <b>MID 147</b>    | 1.5                | 2.8        | 3.7        | 2.3        |
| <b>SAI 125</b>    | 1.2                | 1.3        | 1.0        | 0.7        |
| <b>MID 151</b>    | 1.0                | 1.0        | 1.1        | 1.2        |
| <b>N 865</b>      | 1.0                | 1.0        | 1.0        | 1.2        |
| <b>MID 153</b>    | 1.0                | 1.0        | 1.0        | 1.1        |
| <b>MID 343</b>    | 1.0                | 1.1        | 1.4        | 2.2        |
| <b>M 3007a</b>    | 1.0                | 1.0        | 1.1        | 1.1        |
| <b>MID 367</b>    | 1.0                | 1.1        | 1.1        | 1.6        |
| <b>N 1048</b>     | 1.1                | 1.2        | 2.2        | 4.0        |
| <b>N 979</b>      | 1.0                | 1.0        | 1.0        | 0.8        |
| <b>N 971</b>      | 1.0                | 1.0        | 1.0        | 1.0        |
| <b>N 973</b>      | 1.0                | 1.1        | 1.1        | 1.2        |
| <b>N 976</b>      | 1.0                | 1.0        | 1.0        | 1.1        |
| <b>N 980</b>      | 1.0                | 1.0        | 1.0        | 1.2        |
| <b>N 1205</b>     | 1.3                | 1.8        | 2.2        | 1.8        |
| <b>N 960a</b>     | 1.0                | 1.1        | 1.1        | 1.2        |

|                |      |      |     |     |
|----------------|------|------|-----|-----|
| <b>ZS 331</b>  | 1.1  | 1.2  | 1.3 | 1.4 |
| <b>N 1027</b>  | 1.0  | 1.0  | 1.0 | 1.0 |
| <b>M 2766</b>  | 1.0  | 1.1  | 1.2 | 1.3 |
| <b>ZS 362</b>  | 1.0  | 1.0  | 1.0 | 1.2 |
| <b>N 1179</b>  | 1.0  | 1.0  | 1.0 | 1.1 |
| <b>N 1180</b>  | 1.0  | 1.0  | 1.0 | 0.9 |
| <b>N 1204</b>  | 1.2  | 1.5  | 1.8 | 1.2 |
| <b>N 1206</b>  | 1.0  | 0.9  | 1.0 | 1.1 |
| <b>ZS 309</b>  | 1.1  | 1.4  | 1.8 | 1.6 |
| <b>ZS 316</b>  | 1.0  | 1.0  | 1.0 | 0.8 |
| <b>ZS 319</b>  | 1.0  | 0.9  | 1.0 | 1.0 |
| <b>ZS 325</b>  | 1.0  | 1.0  | 1.0 | 1.1 |
| <b>MID 213</b> | 1.0  | 1.0  | 1.1 | 1.0 |
| <b>M 2767</b>  | 1.2  | 2.1  | 3.9 | 4.4 |
| <b>M 2876</b>  | 1.0  | 1.0  | 1.0 | 0.9 |
| <b>SH 16</b>   | 1.1  | 1.0  | 1.1 | 1.2 |
| <b>SAI 472</b> | 1.2  | 1.6  | 1.6 | 1.0 |
| <b>SAI 499</b> | 1.0  | 1.0  | 1.0 | 0.9 |
| <b>SAI 503</b> | 1.0  | 1.0  | 1.0 | 0.9 |
| <b>SAI 474</b> | 1.0  | 1.0  | 1.0 | 0.9 |
| <b>SAI 477</b> | 4.3  | 3.2  | 1.0 | 1.0 |
| <b>N 1196</b>  | 1.0  | 1.0  | 1.0 | 1.0 |
| <b>N 1197</b>  | 1.0  | 1.0  | 1.0 | 1.1 |
| <b>SAI 127</b> | 1.2  | 1.7  | 1.2 | 1.0 |
| <b>N 1056</b>  | 1.0  | 1.0  | 1.2 | 1.2 |
| <b>N 1068</b>  | 1.0  | 1.0  | 1.0 | 1.1 |
| <b>N 1069</b>  | 1.0  | 1.0  | 1.2 | 1.1 |
| <b>A9</b>      | 1.0  | 0.9  | 1.0 | 1.0 |
| <b>N 1198</b>  | 0.9  | 1.0  | 1.0 | 1.0 |
| <b>N 1193</b>  | 1.3  | 1.9  | 2.4 | 2.1 |
| <b>N 1199</b>  | 1.0  | 1.1  | 1.3 | 1.1 |
| <b>SAI 363</b> | 3.0  | 7.3  | 1.2 | 0.9 |
| <b>SAI 366</b> | 10.7 | 29.7 | 3.1 | 1.0 |
| <b>SAI 362</b> | 1.7  | 3.8  | 1.3 | 0.9 |
| <b>SAI 365</b> | 12.0 | 34.4 | 4.3 | 1.1 |
| <b>SAI 120</b> | 1.0  | 1.1  | 1.1 | 1.1 |
| <b>SAI 458</b> | 1.1  | 1.2  | 1.0 | 0.9 |
| <b>SAI 459</b> | 1.0  | 1.0  | 1.0 | 0.9 |
| <b>SAI 487</b> | 1.0  | 1.0  | 1.0 | 1.0 |
| <b>N 1131</b>  | 1.0  | 1.0  | 1.0 | 1.0 |
| <b>MID 323</b> | 1.0  | 1.0  | 1.2 | 1.3 |
| <b>SAI 379</b> | 1.0  | 1.2  | 1.0 | 0.9 |
| <b>SAI 367</b> | 1.2  | 1.1  | 1.0 | 1.0 |
| <b>M 2738d</b> | 1.0  | 1.4  | 1.9 | 1.1 |
| <b>ZS 260</b>  | 1.4  | 2.2  | 2.4 | 1.4 |
| <b>N 871a</b>  | 1.4  | 2.3  | 2.7 | 1.6 |
| <b>N 901</b>   | 1.0  | 1.0  | 1.2 | 1.4 |

**Table S2.18.** Results of interaction with nanoFAST-R52V

| <b>Cmpd</b>       | <b>Enhancement</b> |            |            |            |
|-------------------|--------------------|------------|------------|------------|
|                   | <b>430</b>         | <b>480</b> | <b>530</b> | <b>580</b> |
| <b>HBR-DOM2</b>   | 9.8                | 88.6       | 264.3      | 4.1        |
| <b>HBR-2,5-DM</b> | 1.4                | 2.9        | 1.7        | 1.1        |
| <b>HMBR</b>       | 1.2                | 1.3        | 1.0        | 0.9        |
| <b>HBR-DOM</b>    | 1.1                | 1.3        | 2.5        | 2.0        |
| <b>N 871b</b>     | 1.0                | 1.1        | 1.4        | 1.5        |
| <b>MID 145</b>    | 1.1                | 1.3        | 1.4        | 1.2        |
| <b>N 1052</b>     | 1.1                | 1.4        | 1.7        | 1.3        |
| <b>N 1184</b>     | 1.0                | 1.1        | 1.4        | 1.7        |
| <b>N 1122</b>     | 1.1                | 1.2        | 1.1        | 0.8        |
| <b>N 1049</b>     | 1.1                | 1.4        | 1.7        | 1.1        |
| <b>N 1123</b>     | 1.0                | 1.0        | 1.0        | 0.7        |
| <b>N 1139</b>     | 1.0                | 1.1        | 1.8        | 2.5        |
| <b>N 1118</b>     | 1.1                | 1.2        | 1.1        | 1.1        |
| <b>SAI 112</b>    | 1.3                | 2.3        | 1.4        | 0.8        |
| <b>N 1135</b>     | 1.0                | 1.0        | 1.0        | 0.8        |
| <b>SAI 118</b>    | 1.0                | 1.1        | 1.1        | 0.6        |
| <b>N 1124</b>     | 1.0                | 1.0        | 1.1        | 1.1        |
| <b>SAI 122</b>    | 2.7                | 3.5        | 1.1        | 0.8        |
| <b>N 1142</b>     | 1.1                | 1.3        | 1.5        | 1.4        |
| <b>SAI 199</b>    | 3.0                | 3.9        | 1.1        | 1.1        |
| <b>N 967</b>      | 1.0                | 1.1        | 1.2        | 1.4        |
| <b>N 1039</b>     | 1.1                | 1.3        | 1.6        | 1.5        |
| <b>N 1202</b>     | 1.0                | 1.1        | 1.5        | 1.5        |
| <b>N 960b</b>     | 1.0                | 1.2        | 1.5        | 1.8        |
| <b>N 1036</b>     | 1.0                | 1.0        | 1.0        | 1.0        |
| <b>SAI 117</b>    | 1.1                | 1.5        | 1.0        | 1.2        |
| <b>N 1042</b>     | 1.0                | 1.0        | 1.0        | 1.0        |
| <b>SAI 121</b>    | 1.0                | 1.2        | 1.1        | 0.9        |
| <b>MID 147</b>    | 1.5                | 2.8        | 3.5        | 2.1        |
| <b>SAI 125</b>    | 1.2                | 1.4        | 1.1        | 0.7        |
| <b>MID 151</b>    | 1.0                | 1.0        | 1.0        | 1.0        |
| <b>N 865</b>      | 1.0                | 1.0        | 1.0        | 1.1        |
| <b>MID 153</b>    | 1.0                | 1.0        | 1.0        | 1.1        |
| <b>MID 343</b>    | 1.0                | 1.1        | 1.3        | 1.8        |
| <b>M 3007a</b>    | 1.0                | 1.0        | 1.1        | 0.9        |
| <b>MID 367</b>    | 1.0                | 1.0        | 1.1        | 1.4        |
| <b>N 1048</b>     | 1.1                | 1.4        | 2.9        | 5.2        |
| <b>N 979</b>      | 1.0                | 1.0        | 1.0        | 1.3        |
| <b>N 971</b>      | 1.0                | 1.0        | 1.0        | 1.2        |
| <b>N 973</b>      | 1.0                | 1.1        | 1.1        | 1.1        |
| <b>N 976</b>      | 1.0                | 1.0        | 1.0        | 1.3        |
| <b>N 980</b>      | 1.0                | 1.0        | 1.0        | 1.0        |
| <b>N 1205</b>     | 1.3                | 1.6        | 2.2        | 1.8        |
| <b>N 960a</b>     | 1.0                | 1.0        | 1.1        | 1.3        |



|                |      |      |     |     |
|----------------|------|------|-----|-----|
| <b>ZS 331</b>  | 1.1  | 1.2  | 1.3 | 1.4 |
| <b>N 1027</b>  | 1.0  | 1.0  | 1.0 | 0.9 |
| <b>M 2766</b>  | 1.1  | 1.2  | 1.4 | 1.4 |
| <b>ZS 362</b>  | 1.0  | 1.0  | 1.0 | 0.9 |
| <b>N 1179</b>  | 1.0  | 1.0  | 1.0 | 1.1 |
| <b>N 1180</b>  | 1.0  | 1.0  | 1.0 | 1.1 |
| <b>N 1204</b>  | 1.1  | 1.3  | 1.6 | 1.2 |
| <b>N 1206</b>  | 1.0  | 0.9  | 1.0 | 1.0 |
| <b>ZS 309</b>  | 1.1  | 1.2  | 1.4 | 1.4 |
| <b>ZS 316</b>  | 1.0  | 1.0  | 1.0 | 1.0 |
| <b>ZS 319</b>  | 1.0  | 0.9  | 0.9 | 1.0 |
| <b>ZS 325</b>  | 1.0  | 1.0  | 1.0 | 1.0 |
| <b>MID 213</b> | 1.0  | 1.0  | 1.1 | 1.0 |
| <b>M 2767</b>  | 1.2  | 2.0  | 4.2 | 4.3 |
| <b>M 2876</b>  | 1.0  | 0.9  | 1.0 | 0.8 |
| <b>SH 16</b>   | 1.0  | 1.0  | 1.0 | 1.0 |
| <b>SAI 472</b> | 1.2  | 1.7  | 1.5 | 1.1 |
| <b>SAI 499</b> | 1.0  | 1.0  | 1.0 | 1.1 |
| <b>SAI 503</b> | 1.0  | 1.0  | 1.0 | 1.2 |
| <b>SAI 474</b> | 1.0  | 0.9  | 1.0 | 1.0 |
| <b>SAI 477</b> | 4.9  | 3.6  | 1.0 | 1.1 |
| <b>N 1196</b>  | 1.0  | 1.0  | 1.1 | 1.2 |
| <b>N 1197</b>  | 1.0  | 1.0  | 1.0 | 1.1 |
| <b>SAI 127</b> | 1.3  | 2.0  | 1.2 | 1.0 |
| <b>N 1056</b>  | 1.0  | 1.0  | 1.1 | 1.1 |
| <b>N 1068</b>  | 1.0  | 1.0  | 1.0 | 1.1 |
| <b>N 1069</b>  | 1.0  | 1.0  | 1.1 | 1.2 |
| <b>A9</b>      | 0.9  | 0.9  | 0.9 | 0.9 |
| <b>N 1198</b>  | 1.0  | 1.0  | 1.0 | 0.9 |
| <b>N 1193</b>  | 1.3  | 1.6  | 2.0 | 1.9 |
| <b>N 1199</b>  | 1.0  | 1.1  | 1.3 | 1.1 |
| <b>SAI 363</b> | 7.5  | 18.8 | 1.3 | 1.0 |
| <b>SAI 366</b> | 12.1 | 31.0 | 3.5 | 1.0 |
| <b>SAI 362</b> | 2.8  | 7.7  | 1.4 | 0.9 |
| <b>SAI 365</b> | 11.8 | 30.9 | 4.1 | 1.0 |
| <b>SAI 120</b> | 1.0  | 1.0  | 1.1 | 1.0 |
| <b>SAI 458</b> | 1.1  | 1.5  | 1.1 | 1.0 |
| <b>SAI 459</b> | 1.0  | 1.0  | 1.0 | 1.0 |
| <b>SAI 487</b> | 1.0  | 1.0  | 1.0 | 1.0 |
| <b>N 1131</b>  | 1.0  | 1.0  | 1.0 | 1.0 |
| <b>MID 323</b> | 1.0  | 1.0  | 1.2 | 1.5 |
| <b>SAI 379</b> | 1.0  | 1.2  | 1.0 | 0.9 |
| <b>SAI 367</b> | 1.2  | 1.1  | 1.0 | 1.1 |
| <b>M 2738d</b> | 1.1  | 2.5  | 3.8 | 1.0 |
| <b>ZS 260</b>  | 1.3  | 1.6  | 1.7 | 1.2 |
| <b>N 871a</b>  | 1.3  | 1.8  | 2.0 | 1.4 |
| <b>N 901</b>   | 0.9  | 0.9  | 1.0 | 1.2 |

**Table S2.19.** Results of interaction with nanoFAST-P68N

| <b>Cmpd</b>       | <b>Enhancement</b> |            |            |            |
|-------------------|--------------------|------------|------------|------------|
|                   | <b>430</b>         | <b>480</b> | <b>530</b> | <b>580</b> |
| <b>HBR-DOM2</b>   | 6.3                | 41.9       | 66.5       | 2.6        |
| <b>HBR-2,5-DM</b> | 1.9                | 6.9        | 5.6        | 0.8        |
| <b>HMBR</b>       | 1.3                | 2.2        | 1.3        | 1.1        |
| <b>HBR-DOM</b>    | 1.1                | 1.7        | 3.6        | 2.1        |
| <b>N 871b</b>     | 1.0                | 1.1        | 1.2        | 1.3        |
| <b>MID 145</b>    | 1.2                | 1.4        | 1.3        | 1.1        |
| <b>N 1052</b>     | 1.2                | 1.6        | 2.0        | 2.3        |
| <b>N 1184</b>     | 1.0                | 1.1        | 1.1        | 1.3        |
| <b>N 1122</b>     | 1.1                | 1.2        | 1.2        | 1.0        |
| <b>N 1049</b>     | 1.1                | 1.4        | 1.6        | 1.7        |
| <b>N 1123</b>     | 1.0                | 1.0        | 1.1        | 1.0        |
| <b>N 1139</b>     | 1.0                | 1.1        | 1.7        | 2.8        |
| <b>N 1118</b>     | 1.1                | 1.3        | 1.5        | 1.6        |
| <b>SAI 112</b>    | 1.8                | 5.3        | 1.9        | 1.2        |
| <b>N 1135</b>     | 1.0                | 1.0        | 1.1        | 1.1        |
| <b>SAI 118</b>    | 1.5                | 3.0        | 1.3        | 1.0        |
| <b>N 1124</b>     | 1.0                | 1.0        | 1.0        | 1.1        |
| <b>SAI 122</b>    | 2.4                | 4.0        | 1.2        | 1.0        |
| <b>N 1142</b>     | 1.1                | 1.2        | 1.3        | 1.2        |
| <b>SAI 199</b>    | 2.5                | 4.2        | 1.1        | 1.0        |
| <b>N 967</b>      | 1.0                | 1.1        | 1.4        | 1.6        |
| <b>N 1039</b>     | 1.2                | 1.4        | 1.6        | 1.5        |
| <b>N 1202</b>     | 1.0                | 1.0        | 1.2        | 1.2        |
| <b>N 960b</b>     | 1.1                | 1.2        | 1.4        | 1.6        |
| <b>N 1036</b>     | 1.0                | 1.0        | 1.1        | 0.9        |
| <b>SAI 117</b>    | 1.7                | 3.4        | 1.2        | 1.0        |
| <b>N 1042</b>     | 1.0                | 1.0        | 1.0        | 1.2        |
| <b>SAI 121</b>    | 1.2                | 1.8        | 1.2        | 1.1        |
| <b>MID 147</b>    | 1.6                | 2.8        | 3.4        | 2.1        |
| <b>SAI 125</b>    | 1.7                | 3.5        | 1.2        | 0.8        |
| <b>MID 151</b>    | 1.0                | 1.0        | 1.0        | 1.0        |
| <b>N 865</b>      | 1.0                | 1.0        | 1.1        | 1.3        |
| <b>MID 153</b>    | 1.0                | 1.0        | 1.0        | 1.0        |
| <b>MID 343</b>    | 1.0                | 1.1        | 1.4        | 1.9        |
| <b>M 3007a</b>    | 1.0                | 1.1        | 1.2        | 1.3        |
| <b>MID 367</b>    | 1.0                | 1.1        | 1.2        | 1.3        |
| <b>N 1048</b>     | 1.1                | 1.2        | 1.4        | 1.7        |
| <b>N 979</b>      | 1.0                | 1.0        | 1.0        | 0.8        |
| <b>N 971</b>      | 1.0                | 1.0        | 1.0        | 1.0        |
| <b>N 973</b>      | 1.1                | 1.1        | 1.1        | 1.2        |
| <b>N 976</b>      | 1.0                | 1.0        | 1.0        | 1.0        |
| <b>N 980</b>      | 1.0                | 1.0        | 1.1        | 1.0        |
| <b>N 1205</b>     | 1.2                | 1.4        | 1.8        | 1.7        |
| <b>N 960a</b>     | 1.0                | 1.1        | 1.2        | 1.1        |

|                |     |      |     |     |
|----------------|-----|------|-----|-----|
| <b>ZS 331</b>  | 1.1 | 1.3  | 1.4 | 1.5 |
| <b>N 1027</b>  | 1.0 | 1.0  | 1.0 | 1.1 |
| <b>M 2766</b>  | 1.1 | 1.1  | 1.2 | 1.3 |
| <b>ZS 362</b>  | 1.0 | 1.0  | 1.0 | 1.4 |
| <b>N 1179</b>  | 1.0 | 1.0  | 1.1 | 1.2 |
| <b>N 1180</b>  | 0.9 | 0.9  | 1.0 | 1.1 |
| <b>N 1204</b>  | 1.0 | 1.2  | 1.5 | 1.2 |
| <b>N 1206</b>  | 1.0 | 1.0  | 1.1 | 1.0 |
| <b>ZS 309</b>  | 1.2 | 1.6  | 2.2 | 1.5 |
| <b>ZS 316</b>  | 1.0 | 1.0  | 1.0 | 1.1 |
| <b>ZS 319</b>  | 1.0 | 0.9  | 0.9 | 1.0 |
| <b>ZS 325</b>  | 1.0 | 1.0  | 1.0 | 1.0 |
| <b>MID 213</b> | 1.0 | 1.0  | 1.1 | 0.9 |
| <b>M 2767</b>  | 1.1 | 1.5  | 3.0 | 3.1 |
| <b>M 2876</b>  | 1.0 | 1.0  | 1.1 | 1.0 |
| <b>SH 16</b>   | 1.1 | 1.1  | 1.1 | 1.1 |
| <b>SAI 472</b> | 1.1 | 1.1  | 1.1 | 0.8 |
| <b>SAI 499</b> | 1.0 | 1.0  | 1.0 | 1.0 |
| <b>SAI 503</b> | 1.0 | 1.0  | 1.0 | 1.0 |
| <b>SAI 474</b> | 1.0 | 1.0  | 1.0 | 0.9 |
| <b>SAI 477</b> | 1.7 | 1.3  | 1.0 | 1.0 |
| <b>N 1196</b>  | 1.0 | 1.0  | 1.1 | 1.1 |
| <b>N 1197</b>  | 1.0 | 1.0  | 1.1 | 1.0 |
| <b>SAI 127</b> | 1.8 | 5.0  | 1.7 | 1.2 |
| <b>N 1056</b>  | 1.0 | 1.0  | 1.1 | 1.2 |
| <b>N 1068</b>  | 1.0 | 1.0  | 1.0 | 1.2 |
| <b>N 1069</b>  | 1.0 | 1.1  | 1.2 | 1.1 |
| <b>A9</b>      | 1.0 | 1.0  | 1.0 | 1.0 |
| <b>N 1198</b>  | 1.0 | 1.0  | 1.1 | 1.0 |
| <b>N 1193</b>  | 2.4 | 4.0  | 2.5 | 2.0 |
| <b>N 1199</b>  | 1.1 | 1.2  | 1.6 | 1.1 |
| <b>SAI 363</b> | 1.3 | 2.3  | 1.1 | 1.0 |
| <b>SAI 366</b> | 9.5 | 26.5 | 3.7 | 1.1 |
| <b>SAI 362</b> | 2.3 | 7.1  | 1.9 | 1.0 |
| <b>SAI 365</b> | 8.2 | 23.4 | 4.0 | 1.0 |
| <b>SAI 120</b> | 1.0 | 0.9  | 1.1 | 1.0 |
| <b>SAI 458</b> | 1.1 | 1.6  | 1.1 | 0.9 |
| <b>SAI 459</b> | 1.0 | 1.0  | 1.0 | 0.9 |
| <b>SAI 487</b> | 1.0 | 1.0  | 1.0 | 1.0 |
| <b>N 1131</b>  | 1.0 | 1.0  | 1.0 | 1.0 |
| <b>MID 323</b> | 1.0 | 1.1  | 1.4 | 1.5 |
| <b>SAI 379</b> | 1.2 | 1.6  | 1.1 | 1.0 |
| <b>SAI 367</b> | 1.2 | 1.1  | 1.1 | 1.0 |
| <b>M 2738d</b> | 1.0 | 1.3  | 1.6 | 0.9 |
| <b>ZS 260</b>  | 1.6 | 2.5  | 2.5 | 1.4 |
| <b>N 871a</b>  | 1.5 | 2.6  | 3.0 | 1.7 |
| <b>N 901</b>   | 1.0 | 1.0  | 1.3 | 1.6 |

**Table S2.20.** Results of interaction with nanoFAST-P68T

| <b>Cmpd</b>       | <b>Enhancement</b> |            |            |            |
|-------------------|--------------------|------------|------------|------------|
|                   | <b>430</b>         | <b>480</b> | <b>530</b> | <b>580</b> |
| <b>HBR-DOM2</b>   | 11.8               | 81.6       | 103.8      | 1.4        |
| <b>HBR-2,5-DM</b> | 2.3                | 7.4        | 2.4        | 0.9        |
| <b>HMBR</b>       | 1.4                | 2.3        | 1.1        | 1.2        |
| <b>HBR-DOM</b>    | 1.1                | 1.4        | 2.2        | 1.2        |
| <b>N 871b</b>     | 1.0                | 1.1        | 1.2        | 1.2        |
| <b>MID 145</b>    | 1.2                | 1.4        | 1.3        | 1.0        |
| <b>N 1052</b>     | 1.2                | 1.6        | 2.0        | 1.5        |
| <b>N 1184</b>     | 1.0                | 1.0        | 1.1        | 0.9        |
| <b>N 1122</b>     | 1.1                | 1.2        | 1.2        | 1.0        |
| <b>N 1049</b>     | 1.1                | 1.3        | 1.7        | 1.5        |
| <b>N 1123</b>     | 1.0                | 1.0        | 1.1        | 1.2        |
| <b>N 1139</b>     | 1.0                | 1.2        | 2.1        | 2.7        |
| <b>N 1118</b>     | 1.1                | 1.2        | 1.2        | 1.1        |
| <b>SAI 112</b>    | 1.4                | 2.7        | 1.9        | 1.0        |
| <b>N 1135</b>     | 1.0                | 1.0        | 1.1        | 1.0        |
| <b>SAI 118</b>    | 1.1                | 1.2        | 1.1        | 1.0        |
| <b>N 1124</b>     | 1.0                | 1.0        | 1.0        | 1.1        |
| <b>SAI 122</b>    | 2.6                | 2.8        | 1.2        | 1.0        |
| <b>N 1142</b>     | 1.1                | 1.2        | 1.3        | 1.2        |
| <b>SAI 199</b>    | 3.0                | 3.1        | 1.1        | 1.2        |
| <b>N 967</b>      | 1.0                | 1.0        | 1.3        | 1.6        |
| <b>N 1039</b>     | 1.2                | 1.4        | 1.5        | 1.3        |
| <b>N 1202</b>     | 1.0                | 1.0        | 1.2        | 1.2        |
| <b>N 960b</b>     | 1.0                | 1.2        | 1.5        | 1.3        |
| <b>N 1036</b>     | 1.0                | 1.0        | 1.0        | 1.1        |
| <b>SAI 117</b>    | 1.5                | 1.9        | 1.2        | 0.8        |
| <b>N 1042</b>     | 1.0                | 1.0        | 1.0        | 1.1        |
| <b>SAI 121</b>    | 1.2                | 1.4        | 1.2        | 1.0        |
| <b>MID 147</b>    | 1.6                | 2.8        | 3.4        | 1.8        |
| <b>SAI 125</b>    | 1.5                | 2.0        | 1.1        | 1.0        |
| <b>MID 151</b>    | 1.0                | 1.0        | 1.1        | 1.1        |
| <b>N 865</b>      | 1.0                | 1.0        | 1.0        | 1.1        |
| <b>MID 153</b>    | 1.0                | 1.0        | 1.2        | 1.3        |
| <b>MID 343</b>    | 1.0                | 1.1        | 1.6        | 1.9        |
| <b>M 3007a</b>    | 1.0                | 1.0        | 1.2        | 1.0        |
| <b>MID 367</b>    | 1.0                | 1.1        | 1.2        | 1.2        |
| <b>N 1048</b>     | 1.0                | 1.2        | 1.7        | 1.8        |
| <b>N 979</b>      | 1.0                | 1.0        | 1.0        | 1.0        |
| <b>N 971</b>      | 1.0                | 1.0        | 1.0        | 1.0        |
| <b>N 973</b>      | 1.0                | 1.1        | 1.1        | 1.3        |
| <b>N 976</b>      | 1.0                | 1.0        | 1.0        | 1.0        |
| <b>N 980</b>      | 1.0                | 1.0        | 1.1        | 1.1        |
| <b>N 1205</b>     | 1.3                | 1.5        | 1.7        | 1.4        |
| <b>N 960a</b>     | 1.0                | 1.1        | 1.2        | 1.2        |

|                |      |      |     |     |
|----------------|------|------|-----|-----|
| <b>ZS 331</b>  | 1.2  | 1.5  | 1.7 | 1.4 |
| <b>N 1027</b>  | 1.0  | 1.0  | 1.0 | 1.1 |
| <b>M 2766</b>  | 1.1  | 1.1  | 1.2 | 1.1 |
| <b>ZS 362</b>  | 1.0  | 1.0  | 1.0 | 1.0 |
| <b>N 1179</b>  | 1.0  | 1.0  | 1.1 | 1.1 |
| <b>N 1180</b>  | 1.0  | 1.0  | 1.0 | 1.1 |
| <b>N 1204</b>  | 1.2  | 1.4  | 1.4 | 1.3 |
| <b>N 1206</b>  | 1.2  | 1.4  | 1.1 | 1.0 |
| <b>ZS 309</b>  | 1.2  | 1.8  | 2.6 | 1.6 |
| <b>ZS 316</b>  | 1.0  | 1.0  | 1.0 | 1.0 |
| <b>ZS 319</b>  | 1.0  | 1.0  | 1.0 | 1.0 |
| <b>ZS 325</b>  | 1.0  | 1.0  | 1.1 | 1.2 |
| <b>MID 213</b> | 1.0  | 1.1  | 1.1 | 1.1 |
| <b>M 2767</b>  | 1.2  | 2.0  | 3.6 | 3.5 |
| <b>M 2876</b>  | 1.2  | 1.1  | 1.1 | 1.2 |
| <b>SH 16</b>   | 1.1  | 1.1  | 1.1 | 1.1 |
| <b>SAI 472</b> | 1.2  | 1.3  | 1.1 | 1.1 |
| <b>SAI 499</b> | 1.0  | 1.0  | 1.0 | 1.0 |
| <b>SAI 503</b> | 1.0  | 1.0  | 1.0 | 1.0 |
| <b>SAI 474</b> | 1.1  | 1.0  | 1.1 | 0.8 |
| <b>SAI 477</b> | 3.9  | 1.8  | 1.0 | 1.0 |
| <b>N 1196</b>  | 1.0  | 1.0  | 1.2 | 1.0 |
| <b>N 1197</b>  | 1.0  | 1.0  | 1.0 | 1.1 |
| <b>SAI 127</b> | 1.8  | 3.1  | 1.5 | 1.0 |
| <b>N 1056</b>  | 1.0  | 1.0  | 1.2 | 1.2 |
| <b>N 1068</b>  | 1.0  | 1.0  | 1.0 | 1.0 |
| <b>N 1069</b>  | 1.0  | 1.1  | 1.2 | 1.1 |
| <b>A9</b>      | 1.0  | 1.0  | 0.9 | 1.1 |
| <b>N 1198</b>  | 1.0  | 1.0  | 1.1 | 1.0 |
| <b>N 1193</b>  | 2.6  | 3.9  | 2.5 | 2.4 |
| <b>N 1199</b>  | 1.1  | 1.2  | 1.6 | 1.5 |
| <b>SAI 363</b> | 1.9  | 3.2  | 1.1 | 0.9 |
| <b>SAI 366</b> | 11.4 | 30.2 | 2.2 | 1.1 |
| <b>SAI 362</b> | 4.9  | 12.8 | 1.5 | 1.0 |
| <b>SAI 365</b> | 11.1 | 29.8 | 2.6 | 0.9 |
| <b>SAI 120</b> | 1.1  | 1.1  | 1.1 | 0.9 |
| <b>SAI 458</b> | 1.4  | 1.9  | 1.0 | 1.0 |
| <b>SAI 459</b> | 1.0  | 1.0  | 1.0 | 1.0 |
| <b>SAI 487</b> | 1.0  | 1.0  | 1.0 | 1.0 |
| <b>N 1131</b>  | 1.0  | 1.0  | 1.0 | 1.1 |
| <b>MID 323</b> | 1.0  | 1.1  | 1.5 | 2.0 |
| <b>SAI 379</b> | 1.2  | 1.3  | 1.1 | 1.0 |
| <b>SAI 367</b> | 1.3  | 1.1  | 1.1 | 1.0 |
| <b>M 2738d</b> | 1.1  | 1.4  | 1.9 | 1.1 |
| <b>ZS 260</b>  | 1.6  | 2.7  | 2.8 | 1.5 |
| <b>N 871a</b>  | 1.6  | 2.5  | 2.8 | 1.7 |
| <b>N 901</b>   | 1.0  | 1.1  | 1.3 | 1.5 |

**Table S2.21.** Results of interaction with nanoFAST-P68Q

| <b>Cmpd</b>       | <b>Enhancement</b> |            |            |            |
|-------------------|--------------------|------------|------------|------------|
|                   | <b>430</b>         | <b>480</b> | <b>530</b> | <b>580</b> |
| <b>HBR-DOM2</b>   | 14.5               | 87.7       | 135.6      | 2.0        |
| <b>HBR-2,5-DM</b> | 2.9                | 10.2       | 3.3        | 1.1        |
| <b>HMBR</b>       | 1.4                | 2.1        | 1.2        | 0.9        |
| <b>HBR-DOM</b>    | 1.0                | 1.3        | 1.9        | 1.3        |
| <b>N 871b</b>     | 1.0                | 1.1        | 1.4        | 1.3        |
| <b>MID 145</b>    | 1.2                | 1.5        | 1.5        | 1.2        |
| <b>N 1052</b>     | 1.2                | 1.6        | 2.1        | 2.3        |
| <b>N 1184</b>     | 1.0                | 1.2        | 1.5        | 1.2        |
| <b>N 1122</b>     | 1.0                | 0.8        | 1.1        | 1.2        |
| <b>N 1049</b>     | 1.1                | 1.4        | 1.5        | 1.7        |
| <b>N 1123</b>     | 1.0                | 1.0        | 1.0        | 1.0        |
| <b>N 1139</b>     | 1.0                | 1.2        | 1.8        | 2.9        |
| <b>N 1118</b>     | 1.1                | 1.1        | 1.1        | 1.4        |
| <b>SAI 112</b>    | 1.4                | 2.5        | 1.8        | 0.9        |
| <b>N 1135</b>     | 1.0                | 1.0        | 1.0        | 0.7        |
| <b>SAI 118</b>    | 1.0                | 1.2        | 1.1        | 0.8        |
| <b>N 1124</b>     | 1.0                | 1.0        | 1.0        | 1.2        |
| <b>SAI 122</b>    | 3.1                | 3.5        | 1.2        | 1.0        |
| <b>N 1142</b>     | 1.1                | 1.2        | 1.2        | 1.0        |
| <b>SAI 199</b>    | 3.5                | 3.8        | 1.0        | 1.1        |
| <b>N 967</b>      | 1.0                | 1.1        | 1.4        | 1.5        |
| <b>N 1039</b>     | 1.2                | 1.6        | 1.9        | 1.3        |
| <b>N 1202</b>     | 1.0                | 1.1        | 1.4        | 1.4        |
| <b>N 960b</b>     | 1.0                | 1.2        | 1.5        | 1.7        |
| <b>N 1036</b>     | 1.0                | 1.0        | 1.1        | 1.1        |
| <b>SAI 117</b>    | 1.2                | 1.6        | 1.1        | 0.9        |
| <b>N 1042</b>     | 1.0                | 1.0        | 1.0        | 0.9        |
| <b>SAI 121</b>    | 1.2                | 1.3        | 1.2        | 1.0        |
| <b>MID 147</b>    | 1.5                | 2.8        | 3.9        | 2.5        |
| <b>SAI 125</b>    | 1.3                | 1.8        | 1.1        | 1.2        |
| <b>MID 151</b>    | 1.0                | 1.0        | 1.0        | 0.9        |
| <b>N 865</b>      | 1.0                | 1.0        | 1.0        | 1.0        |
| <b>MID 153</b>    | 1.0                | 1.0        | 1.0        | 0.9        |
| <b>MID 343</b>    | 1.0                | 1.1        | 1.6        | 2.9        |
| <b>M 3007a</b>    | 1.0                | 1.1        | 1.2        | 1.1        |
| <b>MID 367</b>    | 1.0                | 1.1        | 1.2        | 1.5        |
| <b>N 1048</b>     | 1.0                | 1.2        | 1.8        | 2.3        |
| <b>N 979</b>      | 1.0                | 1.0        | 1.1        | 1.3        |
| <b>N 971</b>      | 1.0                | 1.0        | 1.0        | 0.9        |
| <b>N 973</b>      | 1.0                | 1.1        | 1.1        | 1.2        |
| <b>N 976</b>      | 1.0                | 1.0        | 1.0        | 1.0        |
| <b>N 980</b>      | 1.0                | 1.0        | 1.1        | 0.9        |
| <b>N 1205</b>     | 1.2                | 1.5        | 2.0        | 1.7        |
| <b>N 960a</b>     | 1.0                | 1.0        | 1.1        | 1.0        |

|                |      |      |     |     |
|----------------|------|------|-----|-----|
| <b>ZS 331</b>  | 1.2  | 1.4  | 1.7 | 2.0 |
| <b>N 1027</b>  | 1.0  | 1.0  | 1.0 | 1.2 |
| <b>M 2766</b>  | 1.0  | 1.2  | 1.3 | 1.1 |
| <b>ZS 362</b>  | 1.0  | 1.0  | 1.0 | 1.0 |
| <b>N 1179</b>  | 1.1  | 1.0  | 1.0 | 1.0 |
| <b>N 1180</b>  | 1.1  | 1.0  | 1.0 | 0.9 |
| <b>N 1204</b>  | 1.2  | 1.4  | 1.7 | 1.4 |
| <b>N 1206</b>  | 1.1  | 1.3  | 1.1 | 1.0 |
| <b>ZS 309</b>  | 1.3  | 1.8  | 2.5 | 1.7 |
| <b>ZS 316</b>  | 1.1  | 1.0  | 1.0 | 1.1 |
| <b>ZS 319</b>  | 1.1  | 1.0  | 1.1 | 1.0 |
| <b>ZS 325</b>  | 1.1  | 1.0  | 1.0 | 1.0 |
| <b>MID 213</b> | 1.1  | 1.1  | 1.2 | 1.2 |
| <b>M 2767</b>  | 1.2  | 1.6  | 2.1 | 2.1 |
| <b>M 2876</b>  | 1.0  | 1.0  | 1.0 | 1.1 |
| <b>SH 16</b>   | 1.2  | 1.2  | 1.2 | 1.1 |
| <b>SAI 472</b> | 1.2  | 1.3  | 1.1 | 1.0 |
| <b>SAI 499</b> | 1.1  | 1.0  | 1.1 | 0.9 |
| <b>SAI 503</b> | 1.1  | 1.0  | 1.0 | 0.9 |
| <b>SAI 474</b> | 1.1  | 1.0  | 1.0 | 1.1 |
| <b>SAI 477</b> | 2.7  | 1.5  | 1.0 | 0.9 |
| <b>N 1196</b>  | 1.1  | 1.1  | 1.1 | 1.1 |
| <b>N 1197</b>  | 1.1  | 1.0  | 1.1 | 1.0 |
| <b>SAI 127</b> | 1.7  | 2.9  | 1.4 | 1.0 |
| <b>N 1056</b>  | 1.0  | 1.1  | 1.1 | 1.2 |
| <b>N 1068</b>  | 1.1  | 1.1  | 1.1 | 1.2 |
| <b>N 1069</b>  | 1.1  | 1.2  | 1.3 | 1.1 |
| <b>A9</b>      | 1.1  | 1.0  | 1.0 | 1.0 |
| <b>N 1198</b>  | 1.1  | 1.1  | 1.1 | 1.0 |
| <b>N 1193</b>  | 1.8  | 2.6  | 2.1 | 2.2 |
| <b>N 1199</b>  | 1.1  | 1.2  | 1.5 | 1.3 |
| <b>SAI 363</b> | 1.9  | 3.4  | 1.1 | 1.0 |
| <b>SAI 366</b> | 12.5 | 37.0 | 2.7 | 1.1 |
| <b>SAI 362</b> | 4.1  | 12.2 | 1.6 | 1.0 |
| <b>SAI 365</b> | 11.8 | 35.6 | 3.2 | 0.9 |
| <b>SAI 120</b> | 1.1  | 1.1  | 1.1 | 1.1 |
| <b>SAI 458</b> | 1.4  | 2.1  | 1.0 | 1.1 |
| <b>SAI 459</b> | 1.0  | 1.0  | 1.0 | 1.0 |
| <b>SAI 487</b> | 1.1  | 1.0  | 1.1 | 1.1 |
| <b>N 1131</b>  | 1.1  | 1.1  | 1.0 | 1.1 |
| <b>MID 323</b> | 1.1  | 1.1  | 1.4 | 1.6 |
| <b>SAI 379</b> | 1.2  | 1.3  | 1.1 | 1.0 |
| <b>SAI 367</b> | 1.2  | 1.1  | 1.1 | 1.1 |
| <b>M 2738d</b> | 1.1  | 1.5  | 2.1 | 1.1 |
| <b>ZS 260</b>  | 1.5  | 2.3  | 2.5 | 1.5 |
| <b>N 871a</b>  | 1.5  | 2.5  | 3.2 | 2.0 |
| <b>N 901</b>   | 1.1  | 1.1  | 1.3 | 1.5 |

**Table S2.22.** Results of interaction with nanoFAST-P68S

| Cmpd              | Enhancement |      |      |     |
|-------------------|-------------|------|------|-----|
|                   | 430         | 480  | 530  | 580 |
| <b>HBR-DOM2</b>   | 10.5        | 70.1 | 96.7 | 1.4 |
| <b>HBR-2,5-DM</b> | 2.1         | 6.3  | 2.2  | 1.0 |
| <b>HMBR</b>       | 1.3         | 1.8  | 1.1  | 1.0 |
| <b>HBR-DOM</b>    | 1.1         | 1.4  | 2.0  | 1.2 |
| <b>N 871b</b>     | 1.1         | 1.1  | 1.3  | 1.2 |
| <b>MID 145</b>    | 1.1         | 1.2  | 1.2  | 1.0 |
| <b>N 1052</b>     | 1.2         | 1.3  | 1.4  | 1.3 |
| <b>N 1184</b>     | 1.1         | 1.1  | 1.3  | 1.1 |
| <b>N 1122</b>     | 1.1         | 1.2  | 1.1  | 1.1 |
| <b>N 1049</b>     | 1.1         | 1.1  | 1.2  | 1.1 |
| <b>N 1123</b>     | 1.1         | 1.0  | 1.1  | 1.0 |
| <b>N 1139</b>     | 1.1         | 1.1  | 1.8  | 2.1 |
| <b>N 1118</b>     | 1.1         | 1.2  | 1.2  | 1.0 |
| <b>SAI 112</b>    | 1.5         | 2.4  | 1.7  | 1.1 |
| <b>N 1135</b>     | 1.1         | 1.0  | 1.0  | 1.1 |
| <b>SAI 118</b>    | 1.2         | 1.2  | 1.1  | 1.0 |
| <b>N 1124</b>     | 1.1         | 1.1  | 1.1  | 1.1 |
| <b>SAI 122</b>    | 2.5         | 2.7  | 1.2  | 1.1 |
| <b>N 1142</b>     | 1.1         | 1.1  | 1.1  | 1.0 |
| <b>SAI 199</b>    | 2.6         | 2.6  | 1.0  | 1.1 |
| <b>N 967</b>      | 1.1         | 1.1  | 1.2  | 1.2 |
| <b>N 1039</b>     | 1.2         | 1.3  | 1.4  | 1.2 |
| <b>N 1202</b>     | 1.1         | 1.1  | 1.3  | 1.2 |
| <b>N 960b</b>     | 1.1         | 1.1  | 1.2  | 1.3 |
| <b>N 1036</b>     | 1.1         | 1.1  | 1.1  | 1.1 |
| <b>SAI 117</b>    | 1.3         | 1.6  | 1.2  | 0.9 |
| <b>N 1042</b>     | 1.1         | 1.0  | 1.0  | 1.1 |
| <b>SAI 121</b>    | 1.2         | 1.3  | 1.2  | 1.0 |
| <b>MID 147</b>    | 1.3         | 1.5  | 1.8  | 1.4 |
| <b>SAI 125</b>    | 1.4         | 1.7  | 1.1  | 1.1 |
| <b>MID 151</b>    | 1.1         | 1.1  | 1.1  | 1.2 |
| <b>N 865</b>      | 1.1         | 1.0  | 1.1  | 1.0 |
| <b>MID 153</b>    | 1.1         | 1.1  | 1.2  | 1.2 |
| <b>MID 343</b>    | 1.1         | 1.1  | 1.4  | 1.4 |
| <b>M 3007a</b>    | 1.1         | 1.1  | 1.2  | 1.0 |
| <b>MID 367</b>    | 1.1         | 1.1  | 1.1  | 1.1 |
| <b>N 1048</b>     | 1.1         | 1.2  | 1.7  | 1.7 |
| <b>N 979</b>      | 1.1         | 1.0  | 1.1  | 1.0 |
| <b>N 971</b>      | 1.1         | 1.0  | 1.0  | 1.1 |
| <b>N 973</b>      | 1.1         | 1.0  | 1.1  | 1.1 |
| <b>N 976</b>      | 1.1         | 1.0  | 1.0  | 1.2 |
| <b>N 980</b>      | 1.1         | 1.0  | 1.1  | 0.9 |
| <b>N 1205</b>     | 1.2         | 1.4  | 1.6  | 1.2 |
| <b>N 960a</b>     | 1.1         | 1.1  | 1.1  | 1.0 |



|                |      |      |     |     |
|----------------|------|------|-----|-----|
| <b>ZS 331</b>  | 1.1  | 1.2  | 1.3 | 1.2 |
| <b>N 1027</b>  | 1.1  | 1.0  | 1.0 | 1.0 |
| <b>M 2766</b>  | 1.1  | 1.1  | 1.2 | 1.0 |
| <b>ZS 362</b>  | 1.1  | 1.0  | 1.0 | 1.0 |
| <b>N 1179</b>  | 1.1  | 1.1  | 1.0 | 1.0 |
| <b>N 1180</b>  | 1.1  | 1.1  | 1.1 | 1.0 |
| <b>N 1204</b>  | 1.2  | 1.3  | 1.4 | 1.1 |
| <b>N 1206</b>  | 1.1  | 1.2  | 1.1 | 1.1 |
| <b>ZS 309</b>  | 1.3  | 1.6  | 1.7 | 1.2 |
| <b>ZS 316</b>  | 1.1  | 1.0  | 1.0 | 0.9 |
| <b>ZS 319</b>  | 1.0  | 0.9  | 0.8 | 1.0 |
| <b>ZS 325</b>  | 1.1  | 1.0  | 1.0 | 1.0 |
| <b>MID 213</b> | 1.1  | 1.1  | 1.1 | 1.1 |
| <b>M 2767</b>  | 1.2  | 1.5  | 2.0 | 2.0 |
| <b>M 2876</b>  | 1.1  | 1.0  | 1.0 | 1.0 |
| <b>SH 16</b>   | 1.2  | 1.2  | 1.2 | 1.1 |
| <b>SAI 472</b> | 1.2  | 1.2  | 1.1 | 1.1 |
| <b>SAI 499</b> | 1.1  | 1.0  | 1.0 | 1.2 |
| <b>SAI 503</b> | 1.1  | 1.0  | 1.1 | 1.1 |
| <b>SAI 474</b> | 1.1  | 1.0  | 1.0 | 1.0 |
| <b>SAI 477</b> | 2.2  | 1.5  | 1.0 | 1.0 |
| <b>N 1196</b>  | 1.1  | 1.1  | 1.1 | 1.1 |
| <b>N 1197</b>  | 1.1  | 1.0  | 1.1 | 1.0 |
| <b>SAI 127</b> | 1.5  | 2.4  | 1.4 | 1.1 |
| <b>N 1056</b>  | 1.1  | 1.0  | 1.1 | 1.2 |
| <b>N 1068</b>  | 1.1  | 1.1  | 1.1 | 1.0 |
| <b>N 1069</b>  | 1.1  | 1.2  | 1.3 | 1.1 |
| <b>A9</b>      | 1.1  | 1.0  | 1.0 | 1.0 |
| <b>N 1198</b>  | 1.1  | 1.0  | 1.0 | 1.1 |
| <b>N 1193</b>  | 2.3  | 3.2  | 2.3 | 2.2 |
| <b>N 1199</b>  | 1.1  | 1.2  | 1.6 | 1.3 |
| <b>SAI 363</b> | 1.6  | 2.8  | 1.1 | 1.1 |
| <b>SAI 366</b> | 10.7 | 29.2 | 2.3 | 1.0 |
| <b>SAI 362</b> | 3.1  | 8.3  | 1.4 | 1.0 |
| <b>SAI 365</b> | 9.6  | 26.7 | 2.5 | 1.0 |
| <b>SAI 120</b> | 1.1  | 1.1  | 1.1 | 1.1 |
| <b>SAI 458</b> | 1.3  | 1.9  | 1.0 | 1.0 |
| <b>SAI 459</b> | 1.1  | 1.0  | 1.0 | 1.0 |
| <b>SAI 487</b> | 1.1  | 1.0  | 1.0 | 1.1 |
| <b>N 1131</b>  | 1.1  | 1.1  | 1.0 | 1.1 |
| <b>MID 323</b> | 1.1  | 1.1  | 1.4 | 1.5 |
| <b>SAI 379</b> | 1.2  | 1.3  | 1.1 | 1.1 |
| <b>SAI 367</b> | 1.2  | 1.1  | 1.1 | 1.0 |
| <b>M 2738d</b> | 1.1  | 1.5  | 1.9 | 1.0 |
| <b>ZS 260</b>  | 1.5  | 2.3  | 2.4 | 1.5 |
| <b>N 871a</b>  | 1.5  | 2.1  | 2.1 | 1.2 |
| <b>N 901</b>   | 0.9  | 1.1  | 1.2 | 1.4 |

**Table S2.23.** Results of interaction with nanoFAST-G69S

| <b>Cmpd</b>       | <b>Enhancement</b> |            |            |            |
|-------------------|--------------------|------------|------------|------------|
|                   | <b>430</b>         | <b>480</b> | <b>530</b> | <b>580</b> |
| <b>HBR-DOM2</b>   | 3.3                | 19.7       | 40.6       | 1.3        |
| <b>HBR-2,5-DM</b> | 1.3                | 2.6        | 1.6        | 1.0        |
| <b>HMBR</b>       | 1.1                | 1.2        | 1.1        | 1.0        |
| <b>HBR-DOM</b>    | 1.1                | 1.2        | 1.6        | 1.2        |
| <b>N 871b</b>     | 1.1                | 1.1        | 1.1        | 1.1        |
| <b>MID 145</b>    | 1.1                | 1.1        | 1.1        | 1.1        |
| <b>N 1052</b>     | 1.1                | 1.2        | 1.2        | 1.2        |
| <b>N 1184</b>     | 1.1                | 1.1        | 1.1        | 1.0        |
| <b>N 1122</b>     | 1.1                | 1.1        | 1.2        | 1.1        |
| <b>N 1049</b>     | 1.1                | 1.1        | 1.2        | 1.1        |
| <b>N 1123</b>     | 1.1                | 1.0        | 1.1        | 1.1        |
| <b>N 1139</b>     | 1.1                | 1.3        | 2.7        | 4.5        |
| <b>N 1118</b>     | 1.1                | 1.2        | 1.1        | 1.0        |
| <b>SAI 112</b>    | 1.5                | 2.0        | 1.7        | 1.0        |
| <b>N 1135</b>     | 1.1                | 1.0        | 1.1        | 1.2        |
| <b>SAI 118</b>    | 1.1                | 1.3        | 1.4        | 1.1        |
| <b>N 1124</b>     | 1.1                | 1.1        | 1.1        | 1.1        |
| <b>SAI 122</b>    | 2.0                | 2.6        | 1.2        | 1.3        |
| <b>N 1142</b>     | 1.1                | 1.1        | 1.2        | 1.0        |
| <b>SAI 199</b>    | 1.9                | 2.4        | 1.1        | 1.0        |
| <b>N 967</b>      | 1.1                | 1.0        | 1.1        | 1.1        |
| <b>N 1039</b>     | 1.1                | 1.2        | 1.2        | 1.2        |
| <b>N 1202</b>     | 1.1                | 1.0        | 1.0        | 1.0        |
| <b>N 960b</b>     | 1.1                | 1.2        | 1.2        | 1.3        |
| <b>N 1036</b>     | 1.1                | 1.0        | 1.0        | 1.1        |
| <b>SAI 117</b>    | 1.2                | 1.4        | 1.3        | 1.0        |
| <b>N 1042</b>     | 1.1                | 1.0        | 1.0        | 1.1        |
| <b>SAI 121</b>    | 1.2                | 1.3        | 1.2        | 0.9        |
| <b>MID 147</b>    | 1.3                | 1.4        | 1.6        | 1.3        |
| <b>SAI 125</b>    | 1.2                | 1.4        | 1.2        | 1.1        |
| <b>MID 151</b>    | 1.1                | 1.1        | 1.2        | 1.3        |
| <b>N 865</b>      | 1.1                | 1.0        | 1.0        | 0.9        |
| <b>MID 153</b>    | 1.1                | 1.1        | 1.2        | 1.2        |
| <b>MID 343</b>    | 1.1                | 1.1        | 1.2        | 1.6        |
| <b>M 3007a</b>    | 1.1                | 1.1        | 1.1        | 1.0        |
| <b>MID 367</b>    | 1.1                | 1.0        | 1.1        | 1.1        |
| <b>N 1048</b>     | 1.1                | 1.2        | 1.3        | 1.2        |
| <b>N 979</b>      | 1.1                | 1.0        | 1.1        | 0.9        |
| <b>N 971</b>      | 1.1                | 1.1        | 1.0        | 1.0        |
| <b>N 973</b>      | 1.1                | 1.1        | 1.1        | 1.2        |
| <b>N 976</b>      | 1.1                | 1.0        | 1.0        | 1.1        |
| <b>N 980</b>      | 1.1                | 1.0        | 1.1        | 1.0        |
| <b>N 1205</b>     | 1.3                | 1.5        | 1.8        | 1.5        |
| <b>N 960a</b>     | 1.1                | 1.1        | 1.1        | 1.1        |

|                |     |      |     |     |
|----------------|-----|------|-----|-----|
| <b>ZS 331</b>  | 1.2 | 1.3  | 1.3 | 1.3 |
| <b>N 1027</b>  | 1.1 | 1.0  | 1.0 | 1.0 |
| <b>M 2766</b>  | 1.1 | 1.1  | 1.1 | 1.1 |
| <b>ZS 362</b>  | 1.1 | 1.0  | 1.0 | 1.0 |
| <b>N 1179</b>  | 1.1 | 1.1  | 1.1 | 1.0 |
| <b>N 1180</b>  | 1.1 | 1.1  | 1.1 | 1.1 |
| <b>N 1204</b>  | 1.3 | 1.4  | 1.4 | 1.6 |
| <b>N 1206</b>  | 1.1 | 1.0  | 1.0 | 1.1 |
| <b>ZS 309</b>  | 1.3 | 1.6  | 2.2 | 2.0 |
| <b>ZS 316</b>  | 1.1 | 1.0  | 1.0 | 1.2 |
| <b>ZS 319</b>  | 1.1 | 1.0  | 1.1 | 1.0 |
| <b>ZS 325</b>  | 1.1 | 1.1  | 1.0 | 0.9 |
| <b>MID 213</b> | 1.1 | 1.1  | 1.1 | 1.0 |
| <b>M 2767</b>  | 1.3 | 1.9  | 2.8 | 2.3 |
| <b>M 2876</b>  | 1.1 | 1.0  | 1.1 | 1.0 |
| <b>SH 16</b>   | 1.1 | 1.1  | 1.1 | 1.2 |
| <b>SAI 472</b> | 1.1 | 1.1  | 1.1 | 1.0 |
| <b>SAI 499</b> | 1.1 | 1.1  | 1.0 | 0.9 |
| <b>SAI 503</b> | 1.1 | 1.0  | 1.1 | 1.4 |
| <b>SAI 474</b> | 1.1 | 1.0  | 1.0 | 1.0 |
| <b>SAI 477</b> | 1.7 | 1.4  | 1.0 | 0.9 |
| <b>N 1196</b>  | 1.1 | 1.1  | 1.1 | 1.0 |
| <b>N 1197</b>  | 1.1 | 1.1  | 1.1 | 0.9 |
| <b>SAI 127</b> | 1.4 | 1.8  | 1.6 | 1.1 |
| <b>N 1056</b>  | 1.1 | 1.1  | 1.1 | 1.5 |
| <b>N 1068</b>  | 1.1 | 1.1  | 1.1 | 1.2 |
| <b>N 1069</b>  | 1.1 | 1.3  | 1.3 | 1.2 |
| <b>A9</b>      | 1.1 | 1.0  | 1.0 | 1.0 |
| <b>N 1198</b>  | 1.1 | 1.1  | 1.0 | 1.2 |
| <b>N 1193</b>  | 1.5 | 1.9  | 2.0 | 2.4 |
| <b>N 1199</b>  | 1.1 | 1.2  | 1.5 | 1.3 |
| <b>SAI 363</b> | 1.4 | 2.3  | 1.1 | 1.1 |
| <b>SAI 366</b> | 8.3 | 25.1 | 3.2 | 1.1 |
| <b>SAI 362</b> | 2.1 | 5.4  | 1.4 | 0.9 |
| <b>SAI 365</b> | 6.2 | 18.6 | 3.2 | 1.0 |
| <b>SAI 120</b> | 1.2 | 1.2  | 1.2 | 1.0 |
| <b>SAI 458</b> | 1.2 | 1.3  | 1.1 | 1.0 |
| <b>SAI 459</b> | 1.1 | 1.0  | 1.0 | 0.9 |
| <b>SAI 487</b> | 1.1 | 1.0  | 1.0 | 1.1 |
| <b>N 1131</b>  | 1.1 | 1.1  | 1.0 | 1.1 |
| <b>MID 323</b> | 1.1 | 1.1  | 1.4 | 1.9 |
| <b>SAI 379</b> | 1.1 | 1.2  | 1.2 | 1.0 |
| <b>SAI 367</b> | 1.2 | 1.2  | 1.1 | 1.0 |
| <b>M 2738d</b> | 1.1 | 1.3  | 1.7 | 1.2 |
| <b>ZS 260</b>  | 1.4 | 2.2  | 2.3 | 1.4 |
| <b>N 871a</b>  | 1.5 | 2.0  | 2.3 | 1.7 |
| <b>N 901</b>   | 1.1 | 1.1  | 1.3 | 1.7 |

**Table S2.24.** Results of interaction with nanoFAST-G69T

| <b>Cmpd</b>       | <b>Enhancement</b> |            |            |            |
|-------------------|--------------------|------------|------------|------------|
|                   | <b>430</b>         | <b>480</b> | <b>530</b> | <b>580</b> |
| <b>HBR-DOM2</b>   | 5.2                | 41.2       | 73.9       | 1.9        |
| <b>HBR-2,5-DM</b> | 1.4                | 4.1        | 2.0        | 1.1        |
| <b>HMBR</b>       | 1.1                | 1.4        | 1.1        | 1.3        |
| <b>HBR-DOM</b>    | 1.0                | 1.2        | 1.6        | 1.3        |
| <b>N 871b</b>     | 1.0                | 1.0        | 1.0        | 1.0        |
| <b>MID 145</b>    | 1.1                | 1.3        | 1.2        | 0.8        |
| <b>N 1052</b>     | 1.1                | 1.4        | 1.7        | 1.6        |
| <b>N 1184</b>     | 1.0                | 1.0        | 1.0        | 0.9        |
| <b>N 1122</b>     | 1.0                | 1.1        | 1.1        | 1.1        |
| <b>N 1049</b>     | 1.1                | 1.3        | 1.5        | 1.2        |
| <b>N 1123</b>     | 1.0                | 1.0        | 1.1        | 1.7        |
| <b>N 1139</b>     | 1.0                | 1.2        | 2.4        | 4.1        |
| <b>N 1118</b>     | 1.0                | 1.1        | 1.1        | 1.5        |
| <b>SAI 112</b>    | 1.2                | 1.9        | 1.7        | 1.2        |
| <b>N 1135</b>     | 1.0                | 1.0        | 1.1        | 1.4        |
| <b>SAI 118</b>    | 1.0                | 1.1        | 1.1        | 0.9        |
| <b>N 1124</b>     | 1.0                | 1.0        | 1.0        | 1.2        |
| <b>SAI 122</b>    | 2.3                | 2.9        | 1.2        | 1.0        |
| <b>N 1142</b>     | 1.1                | 1.2        | 1.2        | 1.4        |
| <b>SAI 199</b>    | 2.3                | 2.9        | 1.0        | 0.9        |
| <b>N 967</b>      | 1.0                | 1.0        | 1.2        | 1.4        |
| <b>N 1039</b>     | 1.2                | 1.3        | 1.3        | 1.3        |
| <b>N 1202</b>     | 0.9                | 0.9        | 1.0        | 1.3        |
| <b>N 960b</b>     | 1.1                | 1.2        | 1.3        | 1.4        |
| <b>N 1036</b>     | 1.0                | 1.0        | 1.1        | 1.3        |
| <b>SAI 117</b>    | 1.1                | 1.3        | 1.1        | 1.5        |
| <b>N 1042</b>     | 1.0                | 1.0        | 1.0        | 1.2        |
| <b>SAI 121</b>    | 1.1                | 1.3        | 1.2        | 1.2        |
| <b>MID 147</b>    | 1.4                | 2.4        | 2.7        | 1.6        |
| <b>SAI 125</b>    | 1.1                | 1.3        | 1.1        | 0.8        |
| <b>MID 151</b>    | 1.0                | 1.0        | 1.0        | 0.9        |
| <b>N 865</b>      | 1.0                | 1.0        | 1.0        | 0.9        |
| <b>MID 153</b>    | 1.0                | 1.0        | 0.9        | 0.9        |
| <b>MID 343</b>    | 1.0                | 1.0        | 1.3        | 1.6        |
| <b>M 3007a</b>    | 1.0                | 1.0        | 1.2        | 1.1        |
| <b>MID 367</b>    | 1.0                | 1.0        | 1.2        | 1.6        |
| <b>N 1048</b>     | 1.0                | 1.1        | 1.1        | 1.0        |
| <b>N 979</b>      | 1.0                | 1.0        | 1.0        | 1.2        |
| <b>N 971</b>      | 1.0                | 1.0        | 1.0        | 1.1        |
| <b>N 973</b>      | 1.0                | 1.1        | 1.0        | 0.9        |
| <b>N 976</b>      | 1.0                | 1.0        | 1.0        | 0.6        |
| <b>N 980</b>      | 1.0                | 1.0        | 1.1        | 0.8        |
| <b>N 1205</b>     | 1.4                | 1.6        | 1.6        | 1.6        |
| <b>N 960a</b>     | 1.0                | 1.1        | 1.2        | 1.1        |

|                |     |      |     |     |
|----------------|-----|------|-----|-----|
| <b>ZS 331</b>  | 1.1 | 1.3  | 1.1 | 1.0 |
| <b>N 1027</b>  | 1.0 | 1.0  | 1.0 | 1.0 |
| <b>M 2766</b>  | 1.0 | 1.1  | 1.0 | 1.2 |
| <b>ZS 362</b>  | 1.0 | 1.0  | 1.0 | 0.9 |
| <b>N 1179</b>  | 1.0 | 1.0  | 1.0 | 1.0 |
| <b>N 1180</b>  | 1.0 | 1.0  | 1.0 | 1.1 |
| <b>N 1204</b>  | 1.2 | 1.3  | 1.4 | 1.4 |
| <b>N 1206</b>  | 1.0 | 1.0  | 1.0 | 1.1 |
| <b>ZS 309</b>  | 1.2 | 1.6  | 2.2 | 1.6 |
| <b>ZS 316</b>  | 1.0 | 1.0  | 1.0 | 1.0 |
| <b>ZS 319</b>  | 1.0 | 1.0  | 0.9 | 0.9 |
| <b>ZS 325</b>  | 1.0 | 1.0  | 1.0 | 1.1 |
| <b>MID 213</b> | 1.0 | 1.0  | 1.1 | 1.2 |
| <b>M 2767</b>  | 1.4 | 2.7  | 5.8 | 3.5 |
| <b>M 2876</b>  | 1.0 | 1.0  | 1.0 | 0.9 |
| <b>SH 16</b>   | 1.1 | 1.0  | 1.1 | 0.9 |
| <b>SAI 472</b> | 1.1 | 1.2  | 1.1 | 1.2 |
| <b>SAI 499</b> | 1.0 | 1.0  | 1.0 | 1.1 |
| <b>SAI 503</b> | 1.0 | 1.0  | 1.0 | 1.0 |
| <b>SAI 474</b> | 1.1 | 1.0  | 1.0 | 1.0 |
| <b>SAI 477</b> | 1.9 | 1.5  | 1.0 | 1.0 |
| <b>N 1196</b>  | 1.0 | 1.0  | 1.1 | 1.0 |
| <b>N 1197</b>  | 1.0 | 1.0  | 1.0 | 1.1 |
| <b>SAI 127</b> | 1.1 | 1.5  | 1.3 | 1.0 |
| <b>N 1056</b>  | 1.1 | 1.0  | 1.1 | 1.3 |
| <b>N 1068</b>  | 1.0 | 1.0  | 1.0 | 1.1 |
| <b>N 1069</b>  | 1.0 | 1.2  | 1.4 | 1.0 |
| <b>A9</b>      | 1.0 | 1.0  | 1.0 | 1.0 |
| <b>N 1198</b>  | 1.0 | 1.1  | 1.1 | 0.9 |
| <b>N 1193</b>  | 1.5 | 1.9  | 2.0 | 2.0 |
| <b>N 1199</b>  | 1.1 | 1.2  | 1.5 | 1.2 |
| <b>SAI 363</b> | 1.4 | 2.6  | 1.1 | 0.9 |
| <b>SAI 366</b> | 9.9 | 29.2 | 3.7 | 1.0 |
| <b>SAI 362</b> | 2.6 | 7.5  | 1.5 | 1.1 |
| <b>SAI 365</b> | 7.4 | 22.0 | 3.5 | 1.2 |
| <b>SAI 120</b> | 1.1 | 1.1  | 1.1 | 1.1 |
| <b>SAI 458</b> | 1.2 | 1.6  | 1.0 | 1.0 |
| <b>SAI 459</b> | 1.0 | 1.0  | 1.0 | 0.9 |
| <b>SAI 487</b> | 1.0 | 1.0  | 1.0 | 1.0 |
| <b>N 1131</b>  | 1.0 | 1.0  | 1.0 | 0.9 |
| <b>MID 323</b> | 1.0 | 1.1  | 1.7 | 2.0 |
| <b>SAI 379</b> | 1.0 | 1.1  | 1.1 | 0.8 |
| <b>SAI 367</b> | 1.1 | 1.0  | 0.9 | 1.0 |
| <b>M 2738d</b> | 1.0 | 1.2  | 1.5 | 1.0 |
| <b>ZS 260</b>  | 1.4 | 2.2  | 2.2 | 1.3 |
| <b>N 871a</b>  | 1.4 | 2.2  | 2.5 | 1.4 |
| <b>N 901</b>   | 1.0 | 1.0  | 1.1 | 1.3 |

**Table S2.25.** Results of interaction with nanoFAST-G69N

| <b>Cmpd</b>       | <b>Enhancement</b> |            |            |            |
|-------------------|--------------------|------------|------------|------------|
|                   | <b>430</b>         | <b>480</b> | <b>530</b> | <b>580</b> |
| <b>HBR-DOM2</b>   | 5.0                | 39.9       | 66.2       | 1.9        |
| <b>HBR-2,5-DM</b> | 1.4                | 3.5        | 1.5        | 1.0        |
| <b>HMBR</b>       | 1.2                | 1.3        | 1.0        | 1.2        |
| <b>HBR-DOM</b>    | 1.0                | 1.2        | 1.6        | 1.2        |
| <b>N 871b</b>     | 1.0                | 1.0        | 1.0        | 1.1        |
| <b>MID 145</b>    | 1.1                | 1.1        | 1.1        | 0.9        |
| <b>N 1052</b>     | 1.1                | 1.3        | 1.4        | 1.2        |
| <b>N 1184</b>     | 1.0                | 1.0        | 1.0        | 1.0        |
| <b>N 1122</b>     | 1.1                | 1.1        | 1.1        | 0.9        |
| <b>N 1049</b>     | 1.0                | 1.1        | 1.2        | 1.3        |
| <b>N 1123</b>     | 1.0                | 1.0        | 1.0        | 1.1        |
| <b>N 1139</b>     | 1.0                | 1.2        | 2.5        | 4.6        |
| <b>N 1118</b>     | 1.0                | 1.1        | 1.1        | 1.2        |
| <b>SAI 112</b>    | 1.4                | 2.4        | 2.0        | 1.2        |
| <b>N 1135</b>     | 1.0                | 1.0        | 1.0        | 1.4        |
| <b>SAI 118</b>    | 1.1                | 1.2        | 1.1        | 1.0        |
| <b>N 1124</b>     | 1.0                | 1.0        | 1.1        | 1.2        |
| <b>SAI 122</b>    | 2.2                | 2.4        | 1.2        | 1.0        |
| <b>N 1142</b>     | 1.1                | 1.1        | 1.1        | 1.4        |
| <b>SAI 199</b>    | 2.3                | 2.6        | 1.0        | 1.0        |
| <b>N 967</b>      | 1.0                | 1.1        | 1.3        | 1.6        |
| <b>N 1039</b>     | 1.1                | 1.2        | 1.2        | 1.2        |
| <b>N 1202</b>     | 1.0                | 1.0        | 1.0        | 1.2        |
| <b>N 960b</b>     | 1.0                | 1.2        | 1.4        | 1.7        |
| <b>N 1036</b>     | 1.0                | 1.0        | 1.0        | 0.8        |
| <b>SAI 117</b>    | 1.1                | 1.4        | 1.2        | 1.1        |
| <b>N 1042</b>     | 1.0                | 1.0        | 1.0        | 0.9        |
| <b>SAI 121</b>    | 1.1                | 1.2        | 1.2        | 1.1        |
| <b>MID 147</b>    | 1.4                | 2.0        | 2.5        | 1.9        |
| <b>SAI 125</b>    | 1.2                | 1.4        | 1.2        | 0.9        |
| <b>MID 151</b>    | 1.0                | 1.1        | 1.1        | 1.1        |
| <b>N 865</b>      | 1.0                | 1.0        | 1.0        | 0.8        |
| <b>MID 153</b>    | 1.0                | 1.0        | 1.1        | 1.2        |
| <b>MID 343</b>    | 1.0                | 1.0        | 1.2        | 1.6        |
| <b>M 3007a</b>    | 1.0                | 1.0        | 1.1        | 1.2        |
| <b>MID 367</b>    | 1.0                | 1.1        | 1.2        | 1.4        |
| <b>N 1048</b>     | 1.0                | 1.1        | 1.2        | 1.3        |
| <b>N 979</b>      | 1.0                | 1.0        | 1.0        | 1.0        |
| <b>N 971</b>      | 1.0                | 1.0        | 1.0        | 1.1        |
| <b>N 973</b>      | 1.0                | 1.1        | 1.1        | 1.3        |
| <b>N 976</b>      | 1.0                | 1.0        | 1.0        | 0.9        |
| <b>N 980</b>      | 1.0                | 1.0        | 1.1        | 1.1        |
| <b>N 1205</b>     | 1.6                | 1.7        | 1.4        | 1.6        |
| <b>N 960a</b>     | 1.0                | 1.1        | 1.2        | 1.0        |

|                |     |      |     |     |
|----------------|-----|------|-----|-----|
| <b>ZS 331</b>  | 1.1 | 1.3  | 1.4 | 1.2 |
| <b>N 1027</b>  | 1.0 | 1.0  | 1.0 | 0.9 |
| <b>M 2766</b>  | 1.0 | 1.1  | 1.1 | 1.2 |
| <b>ZS 362</b>  | 1.0 | 1.0  | 1.0 | 0.8 |
| <b>N 1179</b>  | 1.0 | 1.0  | 1.0 | 0.9 |
| <b>N 1180</b>  | 1.0 | 1.0  | 1.0 | 1.0 |
| <b>N 1204</b>  | 1.3 | 1.3  | 1.2 | 1.3 |
| <b>N 1206</b>  | 1.0 | 1.0  | 1.0 | 1.0 |
| <b>ZS 309</b>  | 1.1 | 1.5  | 2.5 | 2.0 |
| <b>ZS 316</b>  | 1.0 | 1.0  | 1.0 | 1.0 |
| <b>ZS 319</b>  | 1.0 | 1.0  | 1.0 | 1.0 |
| <b>ZS 325</b>  | 1.0 | 1.0  | 1.0 | 1.0 |
| <b>MID 213</b> | 1.0 | 1.1  | 1.1 | 1.1 |
| <b>M 2767</b>  | 1.1 | 1.5  | 2.3 | 2.3 |
| <b>M 2876</b>  | 1.0 | 1.0  | 1.0 | 1.0 |
| <b>SH 16</b>   | 1.0 | 1.0  | 1.1 | 1.0 |
| <b>SAI 472</b> | 1.0 | 1.1  | 1.1 | 0.9 |
| <b>SAI 499</b> | 1.0 | 1.0  | 1.0 | 0.9 |
| <b>SAI 503</b> | 1.0 | 1.0  | 1.0 | 1.0 |
| <b>SAI 474</b> | 1.1 | 1.0  | 1.0 | 1.0 |
| <b>SAI 477</b> | 1.7 | 1.3  | 1.0 | 0.9 |
| <b>N 1196</b>  | 1.0 | 1.0  | 1.1 | 1.0 |
| <b>N 1197</b>  | 1.0 | 1.0  | 1.0 | 0.9 |
| <b>SAI 127</b> | 1.1 | 1.7  | 1.4 | 1.0 |
| <b>N 1056</b>  | 1.0 | 1.0  | 1.0 | 1.2 |
| <b>N 1068</b>  | 1.0 | 1.0  | 1.0 | 0.9 |
| <b>N 1069</b>  | 1.0 | 1.3  | 1.3 | 1.1 |
| <b>A9</b>      | 1.0 | 1.0  | 1.0 | 0.8 |
| <b>N 1198</b>  | 1.0 | 1.0  | 1.1 | 1.1 |
| <b>N 1193</b>  | 1.5 | 2.1  | 2.0 | 2.3 |
| <b>N 1199</b>  | 1.1 | 1.2  | 1.4 | 1.2 |
| <b>SAI 363</b> | 1.2 | 1.7  | 1.1 | 1.0 |
| <b>SAI 366</b> | 6.0 | 15.9 | 2.1 | 0.9 |
| <b>SAI 362</b> | 2.0 | 4.8  | 1.3 | 0.9 |
| <b>SAI 365</b> | 4.9 | 13.2 | 2.2 | 1.0 |
| <b>SAI 120</b> | 1.1 | 1.1  | 1.1 | 1.1 |
| <b>SAI 458</b> | 1.1 | 1.3  | 1.1 | 1.0 |
| <b>SAI 459</b> | 1.0 | 1.0  | 1.0 | 1.0 |
| <b>SAI 487</b> | 1.0 | 1.0  | 1.0 | 1.2 |
| <b>N 1131</b>  | 1.0 | 1.0  | 1.0 | 1.0 |
| <b>MID 323</b> | 1.0 | 1.1  | 1.3 | 2.0 |
| <b>SAI 379</b> | 1.0 | 1.1  | 1.2 | 1.0 |
| <b>SAI 367</b> | 1.3 | 1.1  | 1.1 | 1.1 |
| <b>M 2738d</b> | 1.0 | 1.4  | 1.8 | 1.1 |
| <b>ZS 260</b>  | 1.5 | 2.4  | 2.4 | 1.4 |
| <b>N 871a</b>  | 1.4 | 2.0  | 2.3 | 1.6 |
| <b>N 901</b>   | 1.0 | 1.0  | 1.1 | 1.5 |

**Table S2.26.** Results of interaction with nanoFAST-G69Q

| <b>Cmpd</b>       | <b>Enhancement</b> |            |            |            |
|-------------------|--------------------|------------|------------|------------|
|                   | <b>430</b>         | <b>480</b> | <b>530</b> | <b>580</b> |
| <b>HBR-DOM2</b>   | 5.0                | 39.9       | 66.2       | 1.9        |
| <b>HBR-2,5-DM</b> | 1.4                | 3.5        | 1.5        | 1.0        |
| <b>HMBR</b>       | 1.2                | 1.3        | 1.0        | 1.2        |
| <b>HBR-DOM</b>    | 1.0                | 1.2        | 1.6        | 1.2        |
| <b>N 871b</b>     | 1.0                | 1.0        | 1.0        | 1.1        |
| <b>MID 145</b>    | 1.1                | 1.1        | 1.1        | 0.9        |
| <b>N 1052</b>     | 1.1                | 1.3        | 1.4        | 1.2        |
| <b>N 1184</b>     | 1.0                | 1.0        | 1.0        | 1.0        |
| <b>N 1122</b>     | 1.1                | 1.1        | 1.1        | 0.9        |
| <b>N 1049</b>     | 1.0                | 1.1        | 1.2        | 1.3        |
| <b>N 1123</b>     | 1.0                | 1.0        | 1.0        | 1.1        |
| <b>N 1139</b>     | 1.0                | 1.2        | 2.5        | 4.6        |
| <b>N 1118</b>     | 1.0                | 1.1        | 1.1        | 1.2        |
| <b>SAI 112</b>    | 1.4                | 2.4        | 2.0        | 1.2        |
| <b>N 1135</b>     | 1.0                | 1.0        | 1.0        | 1.4        |
| <b>SAI 118</b>    | 1.1                | 1.2        | 1.1        | 1.0        |
| <b>N 1124</b>     | 1.0                | 1.0        | 1.1        | 1.2        |
| <b>SAI 122</b>    | 2.2                | 2.4        | 1.2        | 1.0        |
| <b>N 1142</b>     | 1.1                | 1.1        | 1.1        | 1.4        |
| <b>SAI 199</b>    | 2.3                | 2.6        | 1.0        | 1.0        |
| <b>N 967</b>      | 1.0                | 1.1        | 1.3        | 1.6        |
| <b>N 1039</b>     | 1.1                | 1.2        | 1.2        | 1.2        |
| <b>N 1202</b>     | 1.0                | 1.0        | 1.0        | 1.2        |
| <b>N 960b</b>     | 1.0                | 1.2        | 1.4        | 1.7        |
| <b>N 1036</b>     | 1.0                | 1.0        | 1.0        | 0.8        |
| <b>SAI 117</b>    | 1.1                | 1.4        | 1.2        | 1.1        |
| <b>N 1042</b>     | 1.0                | 1.0        | 1.0        | 0.9        |
| <b>SAI 121</b>    | 1.1                | 1.2        | 1.2        | 1.1        |
| <b>MID 147</b>    | 1.4                | 2.0        | 2.5        | 1.9        |
| <b>SAI 125</b>    | 1.2                | 1.4        | 1.2        | 0.9        |
| <b>MID 151</b>    | 1.0                | 1.1        | 1.1        | 1.1        |
| <b>N 865</b>      | 1.0                | 1.0        | 1.0        | 0.8        |
| <b>MID 153</b>    | 1.0                | 1.0        | 1.1        | 1.2        |
| <b>MID 343</b>    | 1.0                | 1.0        | 1.2        | 1.6        |
| <b>M 3007a</b>    | 1.0                | 1.0        | 1.1        | 1.2        |
| <b>MID 367</b>    | 1.0                | 1.1        | 1.2        | 1.4        |
| <b>N 1048</b>     | 1.0                | 1.1        | 1.2        | 1.3        |
| <b>N 979</b>      | 1.0                | 1.0        | 1.0        | 1.0        |
| <b>N 971</b>      | 1.0                | 1.0        | 1.0        | 1.1        |
| <b>N 973</b>      | 1.0                | 1.1        | 1.1        | 1.3        |
| <b>N 976</b>      | 1.0                | 1.0        | 1.0        | 0.9        |
| <b>N 980</b>      | 1.0                | 1.0        | 1.1        | 1.1        |
| <b>N 1205</b>     | 1.6                | 1.7        | 1.4        | 1.6        |
| <b>N 960a</b>     | 1.0                | 1.1        | 1.2        | 1.0        |



|                |     |      |     |     |
|----------------|-----|------|-----|-----|
| <b>ZS 331</b>  | 1.1 | 1.3  | 1.4 | 1.2 |
| <b>N 1027</b>  | 1.0 | 1.0  | 1.0 | 0.9 |
| <b>M 2766</b>  | 1.0 | 1.1  | 1.1 | 1.2 |
| <b>ZS 362</b>  | 1.0 | 1.0  | 1.0 | 0.8 |
| <b>N 1179</b>  | 1.0 | 1.1  | 1.0 | 0.9 |
| <b>N 1180</b>  | 1.0 | 1.0  | 1.1 | 1.0 |
| <b>N 1204</b>  | 1.2 | 1.3  | 1.2 | 1.3 |
| <b>N 1206</b>  | 1.0 | 1.0  | 1.0 | 1.1 |
| <b>ZS 309</b>  | 1.2 | 1.7  | 2.5 | 2.4 |
| <b>ZS 316</b>  | 1.0 | 1.0  | 1.0 | 1.1 |
| <b>ZS 319</b>  | 1.0 | 1.0  | 1.0 | 1.1 |
| <b>ZS 325</b>  | 1.0 | 1.0  | 1.0 | 0.9 |
| <b>MID 213</b> | 1.0 | 1.0  | 1.2 | 1.2 |
| <b>M 2767</b>  | 1.3 | 2.7  | 5.5 | 3.8 |
| <b>M 2876</b>  | 1.0 | 1.0  | 1.0 | 1.1 |
| <b>SH 16</b>   | 1.0 | 1.0  | 1.1 | 0.9 |
| <b>SAI 472</b> | 1.1 | 1.1  | 1.1 | 0.9 |
| <b>SAI 499</b> | 1.0 | 1.0  | 1.0 | 1.1 |
| <b>SAI 503</b> | 1.0 | 1.0  | 1.0 | 1.1 |
| <b>SAI 474</b> | 1.0 | 1.0  | 1.0 | 1.1 |
| <b>SAI 477</b> | 1.2 | 1.1  | 1.0 | 1.0 |
| <b>N 1196</b>  | 1.0 | 1.1  | 1.1 | 1.0 |
| <b>N 1197</b>  | 1.0 | 1.0  | 1.0 | 1.1 |
| <b>SAI 127</b> | 1.2 | 1.7  | 1.4 | 0.9 |
| <b>N 1056</b>  | 1.0 | 1.1  | 1.2 | 1.2 |
| <b>N 1068</b>  | 1.0 | 1.0  | 1.0 | 0.9 |
| <b>N 1069</b>  | 1.0 | 1.2  | 1.3 | 0.9 |
| <b>A9</b>      | 1.0 | 1.0  | 1.0 | 1.1 |
| <b>N 1198</b>  | 1.0 | 1.0  | 1.1 | 0.9 |
| <b>N 1193</b>  | 1.7 | 2.3  | 1.8 | 1.8 |
| <b>N 1199</b>  | 1.1 | 1.2  | 1.4 | 1.1 |
| <b>SAI 363</b> | 1.2 | 1.6  | 1.1 | 1.0 |
| <b>SAI 366</b> | 6.7 | 15.3 | 1.7 | 1.0 |
| <b>SAI 362</b> | 1.4 | 2.4  | 1.1 | 1.0 |
| <b>SAI 365</b> | 5.2 | 12.1 | 1.8 | 1.1 |
| <b>SAI 120</b> | 1.1 | 1.1  | 1.1 | 1.2 |
| <b>SAI 458</b> | 1.0 | 1.1  | 1.0 | 0.7 |
| <b>SAI 459</b> | 1.0 | 1.0  | 1.0 | 0.7 |
| <b>SAI 487</b> | 1.0 | 1.0  | 1.0 | 0.9 |
| <b>N 1131</b>  | 1.0 | 1.0  | 1.0 | 0.9 |
| <b>MID 323</b> | 1.0 | 1.1  | 1.4 | 1.8 |
| <b>SAI 379</b> | 1.0 | 1.1  | 1.1 | 1.1 |
| <b>SAI 367</b> | 1.2 | 1.1  | 1.1 | 0.9 |
| <b>M 2738d</b> | 1.0 | 1.3  | 1.5 | 1.0 |
| <b>ZS 260</b>  | 1.6 | 2.6  | 3.0 | 1.6 |
| <b>N 871a</b>  | 1.5 | 2.3  | 2.7 | 1.8 |
| <b>N 901</b>   | 1.0 | 1.0  | 1.1 | 1.7 |

**Table S2.27.** Results of interaction with nanoFAST-E46Q

| <b>Cmpd</b>       | <b>Enhancement</b> |            |            |            |
|-------------------|--------------------|------------|------------|------------|
|                   | <b>430</b>         | <b>480</b> | <b>530</b> | <b>580</b> |
| <b>HBR-DOM2</b>   | 13.0               | >145.6     | >354.5     | 11.5       |
| <b>HBR-2,5-DM</b> | 12.9               | 121.0      | 130.5      | 1.1        |
| <b>HMBR</b>       | 10.6               | 54.3       | 10.7       | 1.1        |
| <b>HBR-DOM</b>    | 4.3                | 38.8       | 171.0      | 42.2       |
| <b>N 871b</b>     | 1.6                | 5.9        | 19.5       | 27.8       |
| <b>MID 145</b>    | 1.8                | 7.9        | 29.5       | 2.5        |
| <b>N 1052</b>     | 1.6                | 4.0        | 15.9       | 15.7       |
| <b>N 1184</b>     | 1.8                | 7.9        | 25.9       | 13.9       |
| <b>N 1122</b>     | 1.6                | 4.7        | 6.1        | 1.4        |
| <b>N 1049</b>     | 1.5                | 5.6        | 23.5       | 12.8       |
| <b>N 1123</b>     | 1.1                | 1.1        | 2.3        | 3.5        |
| <b>N 1139</b>     | 1.1                | 1.6        | 5.0        | 8.8        |
| <b>N 1118</b>     | 1.9                | 6.8        | 11.3       | 1.5        |
| <b>SAI 112</b>    | 12.2               | >67.1      | 4.2        | 1.0        |
| <b>N 1135</b>     | 1.1                | 1.2        | 1.4        | 1.7        |
| <b>SAI 118</b>    | 11.9               | 41.0       | 2.7        | 1.1        |
| <b>N 1124</b>     | 1.1                | 2.0        | 4.2        | 2.6        |
| <b>SAI 122</b>    | 8.6                | 25.9       | 1.6        | 1.1        |
| <b>N 1142</b>     | 1.1                | 1.3        | 2.0        | 1.4        |
| <b>SAI 199</b>    | 16.9               | 54.8       | 1.8        | 1.0        |
| <b>N 967</b>      | 1.2                | 2.7        | 10.4       | 20.5       |
| <b>N 1039</b>     | 1.7                | 5.1        | 19.0       | 11.8       |
| <b>N 1202</b>     | 1.7                | 7.0        | 23.3       | 24.3       |
| <b>N 960b</b>     | 1.2                | 2.6        | 10.5       | 26.5       |
| <b>N 1036</b>     | 1.9                | 6.6        | 1.9        | 1.4        |
| <b>SAI 117</b>    | 14.8               | 53.1       | 2.7        | 1.0        |
| <b>N 1042</b>     | 1.1                | 1.0        | 1.0        | 1.1        |
| <b>SAI 121</b>    | 8.6                | 27.7       | 1.8        | 1.1        |
| <b>MID 147</b>    | 2.5                | 5.0        | 14.1       | 21.4       |
| <b>SAI 125</b>    | 16.5               | 62.2       | 3.0        | 1.1        |
| <b>MID 151</b>    | 1.1                | 1.7        | 4.3        | 9.3        |
| <b>N 865</b>      | 1.2                | 1.2        | 1.2        | 1.1        |
| <b>MID 153</b>    | 1.1                | 1.3        | 2.7        | 7.3        |
| <b>MID 343</b>    | 1.3                | 1.5        | 6.7        | 18.1       |
| <b>M 3007a</b>    | 1.1                | 1.2        | 2.7        | 3.3        |
| <b>MID 367</b>    | 1.2                | 1.2        | 4.2        | 14.4       |
| <b>N 1048</b>     | 1.2                | 1.9        | 7.9        | 17.8       |
| <b>N 979</b>      | 1.1                | 1.1        | 1.2        | 1.0        |
| <b>N 971</b>      | 1.1                | 1.6        | 4.3        | 6.6        |
| <b>N 973</b>      | 1.1                | 1.6        | 4.1        | 5.5        |
| <b>N 976</b>      | 1.1                | 1.2        | 1.3        | 1.5        |
| <b>N 980</b>      | 1.1                | 1.1        | 1.1        | 1.2        |
| <b>N 1205</b>     | 2.2                | 8.4        | 27.0       | 18.4       |
| <b>N 960a</b>     | 1.1                | 1.1        | 1.2        | 1.4        |

|                |      |       |      |      |
|----------------|------|-------|------|------|
| <b>ZS 331</b>  | 1.3  | 2.4   | 8.4  | 16.2 |
| <b>N 1027</b>  | 2.4  | 1.1   | 1.1  | 1.1  |
| <b>M 2766</b>  | 1.7  | 6.3   | 21.1 | 16.8 |
| <b>ZS 362</b>  | 1.2  | 1.1   | 1.0  | 1.2  |
| <b>N 1179</b>  | 1.2  | 1.1   | 1.1  | 1.0  |
| <b>N 1180</b>  | 1.2  | 1.1   | 1.1  | 0.9  |
| <b>N 1204</b>  | 2.0  | 7.4   | 21.5 | 14.0 |
| <b>N 1206</b>  | 1.3  | 3.2   | 19.9 | 57.8 |
| <b>ZS 309</b>  | 1.4  | 2.2   | 3.4  | 3.3  |
| <b>ZS 316</b>  | 1.1  | 1.9   | 3.9  | 1.4  |
| <b>ZS 319</b>  | 1.1  | 1.1   | 1.0  | 1.0  |
| <b>ZS 325</b>  | 1.1  | 1.1   | 1.1  | 1.0  |
| <b>MID 213</b> | 1.3  | 2.3   | 10.3 | 23.0 |
| <b>M 2767</b>  | 1.3  | 2.1   | 4.6  | 9.7  |
| <b>M 2876</b>  | 1.2  | 1.5   | 1.0  | 1.3  |
| <b>SH 16</b>   | 1.5  | 4.1   | 6.2  | 1.6  |
| <b>SAI 472</b> | 2.9  | 7.6   | 4.8  | 1.4  |
| <b>SAI 499</b> | 1.6  | 1.7   | 1.1  | 1.0  |
| <b>SAI 503</b> | 2.3  | 1.3   | 1.0  | 1.0  |
| <b>SAI 474</b> | 2.0  | 1.0   | 1.0  | 0.9  |
| <b>SAI 477</b> | 11.7 | 7.4   | 1.1  | 0.9  |
| <b>N 1196</b>  | 1.1  | 1.1   | 1.1  | 0.9  |
| <b>N 1197</b>  | 1.1  | 1.1   | 1.0  | 1.0  |
| <b>SAI 127</b> | 12.9 | 59.7  | 3.2  | 1.0  |
| <b>N 1056</b>  | 1.1  | 1.2   | 1.8  | 3.3  |
| <b>N 1068</b>  | 1.1  | 1.0   | 1.1  | 1.1  |
| <b>N 1069</b>  | 1.1  | 1.1   | 1.2  | 1.2  |
| <b>A9</b>      | 1.1  | 1.0   | 1.1  | 1.1  |
| <b>N 1198</b>  | 1.1  | 1.0   | 1.2  | 1.2  |
| <b>N 1193</b>  | 1.8  | 2.7   | 4.2  | 7.1  |
| <b>N 1199</b>  | 1.2  | 1.6   | 3.1  | 2.6  |
| <b>SAI 363</b> | 7.5  | 30.2  | 1.8  | 0.9  |
| <b>SAI 366</b> | 19.7 | >93.8 | 28.2 | 1.1  |
| <b>SAI 362</b> | 15.4 | 87.4  | 14.7 | 1.0  |
| <b>SAI 365</b> | 15.9 | >87.3 | 27.4 | 0.9  |
| <b>SAI 120</b> | 1.1  | 1.2   | 1.2  | 1.1  |
| <b>SAI 458</b> | 7.0  | 31.6  | 5.7  | 1.2  |
| <b>SAI 459</b> | 1.1  | 1.1   | 1.0  | 1.2  |
| <b>SAI 487</b> | 1.1  | 1.0   | 1.0  | 0.9  |
| <b>N 1131</b>  | 1.3  | 3.1   | 1.6  | 1.0  |
| <b>MID 323</b> | 1.1  | 1.2   | 2.2  | 4.0  |
| <b>SAI 379</b> | 6.8  | 11.0  | 1.2  | 1.3  |
| <b>SAI 367</b> | 1.6  | 2.3   | 1.7  | 1.2  |
| <b>M 2738d</b> | 1.5  | 13.2  | 28.9 | 1.1  |
| <b>ZS 260</b>  | 1.9  | 3.0   | 3.6  | 3.0  |
| <b>N 871a</b>  | 2.6  | 6.9   | 16.9 | 17.9 |
| <b>N 901</b>   | 2.4  | 7.9   | 21.2 | 24.7 |

**Table S2.28.** Results of interaction with nano tFAST-E46Q

| Cmpd              | Enhancement |        |        |       |
|-------------------|-------------|--------|--------|-------|
|                   | 430         | 480    | 530    | 580   |
| <b>HBR-DOM2</b>   | 13.2        | >155.2 | >420.8 | 20.3  |
| <b>HBR-2,5-DM</b> | 15.4        | >170.4 | 228.3  | 1.0   |
| <b>HMBR</b>       | 18.3        | >116.2 | 35.1   | 1.6   |
| <b>HBR-DOM</b>    | 7.1         | 77.7   | 389.6  | 122.4 |
| <b>N 871b</b>     | 1.5         | 5.0    | 20.0   | 51.8  |
| <b>MID 145</b>    | 1.3         | 2.9    | 10.0   | 2.5   |
| <b>N 1052</b>     | 1.3         | 2.0    | 5.2    | 7.7   |
| <b>N 1184</b>     | 1.7         | 6.4    | 25.0   | 35.0  |
| <b>N 1122</b>     | 1.2         | 1.7    | 1.6    | 1.0   |
| <b>N 1049</b>     | 1.2         | 1.9    | 5.7    | 6.3   |
| <b>N 1123</b>     | 1.1         | 1.2    | 2.1    | 3.8   |
| <b>N 1139</b>     | 1.1         | 2.0    | 8.4    | 16.4  |
| <b>N 1118</b>     | 1.4         | 2.1    | 2.6    | 1.1   |
| <b>SAI 112</b>    | 13.7        | >78.5  | 5.6    | 1.2   |
| <b>N 1135</b>     | 1.1         | 1.1    | 1.3    | 1.8   |
| <b>SAI 118</b>    | 13.6        | 49.4   | 2.9    | 1.1   |
| <b>N 1124</b>     | 1.1         | 1.5    | 3.0    | 2.7   |
| <b>SAI 122</b>    | 10.2        | 33.8   | 1.9    | 1.2   |
| <b>N 1142</b>     | 1.1         | 1.4    | 2.7    | 1.8   |
| <b>SAI 199</b>    | 17.4        | 59.3   | 1.9    | 1.3   |
| <b>N 967</b>      | 1.1         | 1.4    | 3.2    | 7.0   |
| <b>N 1039</b>     | 1.9         | 6.1    | 26.5   | 37.9  |
| <b>N 1202</b>     | 1.7         | 6.1    | 23.8   | 48.8  |
| <b>N 960b</b>     | 1.2         | 1.8    | 5.0    | 14.7  |
| <b>N 1036</b>     | 1.2         | 2.2    | 1.5    | 1.3   |
| <b>SAI 117</b>    | 17.0        | 65.4   | 3.5    | 0.9   |
| <b>N 1042</b>     | 1.1         | 1.0    | 1.1    | 1.0   |
| <b>SAI 121</b>    | 11.7        | 46.4   | 2.5    | 1.1   |
| <b>MID 147</b>    | 2.4         | 4.1    | 10.2   | 20.0  |
| <b>SAI 125</b>    | 17.6        | 71.1   | 3.6    | 1.0   |
| <b>MID 151</b>    | 1.1         | 1.2    | 1.8    | 2.8   |
| <b>N 865</b>      | 1.1         | 1.1    | 1.1    | 1.1   |
| <b>MID 153</b>    | 1.1         | 1.2    | 1.6    | 2.2   |
| <b>MID 343</b>    | 1.2         | 1.3    | 3.6    | 12.6  |
| <b>M 3007a</b>    | 1.1         | 1.3    | 3.2    | 5.0   |
| <b>MID 367</b>    | 1.1         | 1.1    | 1.7    | 4.3   |
| <b>N 1048</b>     | 1.4         | 2.2    | 10.8   | 30.2  |
| <b>N 979</b>      | 1.1         | 1.1    | 1.1    | 1.1   |
| <b>N 971</b>      | 1.1         | 1.1    | 1.2    | 1.3   |
| <b>N 973</b>      | 1.1         | 1.1    | 1.2    | 1.3   |
| <b>N 976</b>      | 1.1         | 1.1    | 1.3    | 1.6   |
| <b>N 980</b>      | 1.1         | 1.0    | 1.1    | 1.0   |
| <b>N 1205</b>     | 3.4         | 19.5   | 76.4   | 76.1  |
| <b>N 960a</b>     | 1.1         | 1.2    | 1.4    | 1.5   |

|                |      |        |      |      |
|----------------|------|--------|------|------|
| <b>ZS 331</b>  | 1.4  | 2.3    | 4.8  | 9.5  |
| <b>N 1027</b>  | 1.1  | 1.0    | 1.0  | 1.0  |
| <b>M 2766</b>  | 1.7  | 5.8    | 22.5 | 36.7 |
| <b>ZS 362</b>  | 1.1  | 1.1    | 1.0  | 1.0  |
| <b>N 1179</b>  | 1.2  | 1.2    | 1.2  | 0.9  |
| <b>N 1180</b>  | 1.2  | 1.2    | 1.1  | 1.0  |
| <b>N 1204</b>  | 2.8  | 14.6   | 56.2 | 35.3 |
| <b>N 1206</b>  | 1.1  | 1.4    | 4.1  | 8.1  |
| <b>ZS 309</b>  | 1.8  | 3.0    | 5.0  | 4.3  |
| <b>ZS 316</b>  | 1.1  | 1.1    | 1.2  | 1.0  |
| <b>ZS 319</b>  | 1.1  | 1.1    | 1.1  | 1.0  |
| <b>ZS 325</b>  | 1.1  | 1.1    | 1.2  | 1.1  |
| <b>MID 213</b> | 1.2  | 1.3    | 1.9  | 2.4  |
| <b>M 2767</b>  | 1.5  | 2.9    | 6.7  | 10.6 |
| <b>M 2876</b>  | 1.1  | 1.2    | 1.1  | 1.0  |
| <b>SH 16</b>   | 1.7  | 5.6    | 12.9 | 1.1  |
| <b>SAI 472</b> | 4.3  | 14.6   | 6.2  | 1.1  |
| <b>SAI 499</b> | 1.6  | 2.2    | 1.2  | 1.1  |
| <b>SAI 503</b> | 1.3  | 1.1    | 1.2  | 1.0  |
| <b>SAI 474</b> | 5.1  | 1.1    | 1.1  | 1.0  |
| <b>SAI 477</b> | 45.1 | 31.6   | 1.1  | 1.0  |
| <b>N 1196</b>  | 1.1  | 1.2    | 1.2  | 1.1  |
| <b>N 1197</b>  | 1.1  | 1.1    | 1.1  | 1.0  |
| <b>SAI 127</b> | 14.3 | >77.9  | 3.8  | 1.0  |
| <b>N 1056</b>  | 1.1  | 1.1    | 1.5  | 1.9  |
| <b>N 1068</b>  | 1.1  | 1.1    | 1.2  | 1.1  |
| <b>N 1069</b>  | 1.1  | 1.3    | 1.4  | 1.1  |
| <b>A9</b>      | 1.1  | 1.2    | 1.2  | 1.1  |
| <b>N 1198</b>  | 1.1  | 1.1    | 1.1  | 1.0  |
| <b>N 1193</b>  | 3.4  | 5.6    | 5.2  | 5.8  |
| <b>N 1199</b>  | 1.3  | 2.0    | 4.7  | 2.7  |
| <b>SAI 363</b> | 9.5  | 51.4   | 2.9  | 1.0  |
| <b>SAI 366</b> | 18.6 | >99.8  | 28.7 | 1.0  |
| <b>SAI 362</b> | 19.0 | >134.4 | 21.4 | 1.0  |
| <b>SAI 365</b> | 16.9 | >95.7  | 32.4 | 1.0  |
| <b>SAI 120</b> | 1.2  | 1.3    | 1.3  | 1.1  |
| <b>SAI 458</b> | 14.3 | 85.9   | 20.2 | 1.0  |
| <b>SAI 459</b> | 1.1  | 1.1    | 1.1  | 1.1  |
| <b>SAI 487</b> | 1.1  | 1.1    | 1.1  | 1.1  |
| <b>N 1131</b>  | 1.3  | 2.8    | 2.2  | 1.0  |
| <b>MID 323</b> | 1.2  | 1.3    | 3.2  | 4.6  |
| <b>SAI 379</b> | 7.4  | 12.5   | 1.4  | 1.1  |
| <b>SAI 367</b> | 2.7  | 3.1    | 2.5  | 1.0  |
| <b>M 2738d</b> | 1.3  | 6.1    | 12.0 | 1.2  |
| <b>ZS 260</b>  | 2.7  | 6.1    | 8.1  | 3.6  |
| <b>N 871a</b>  | 3.3  | 7.9    | 20.3 | 23.1 |
| <b>N 901</b>   | 4.2  | 19.2   | 60.0 | 57.8 |

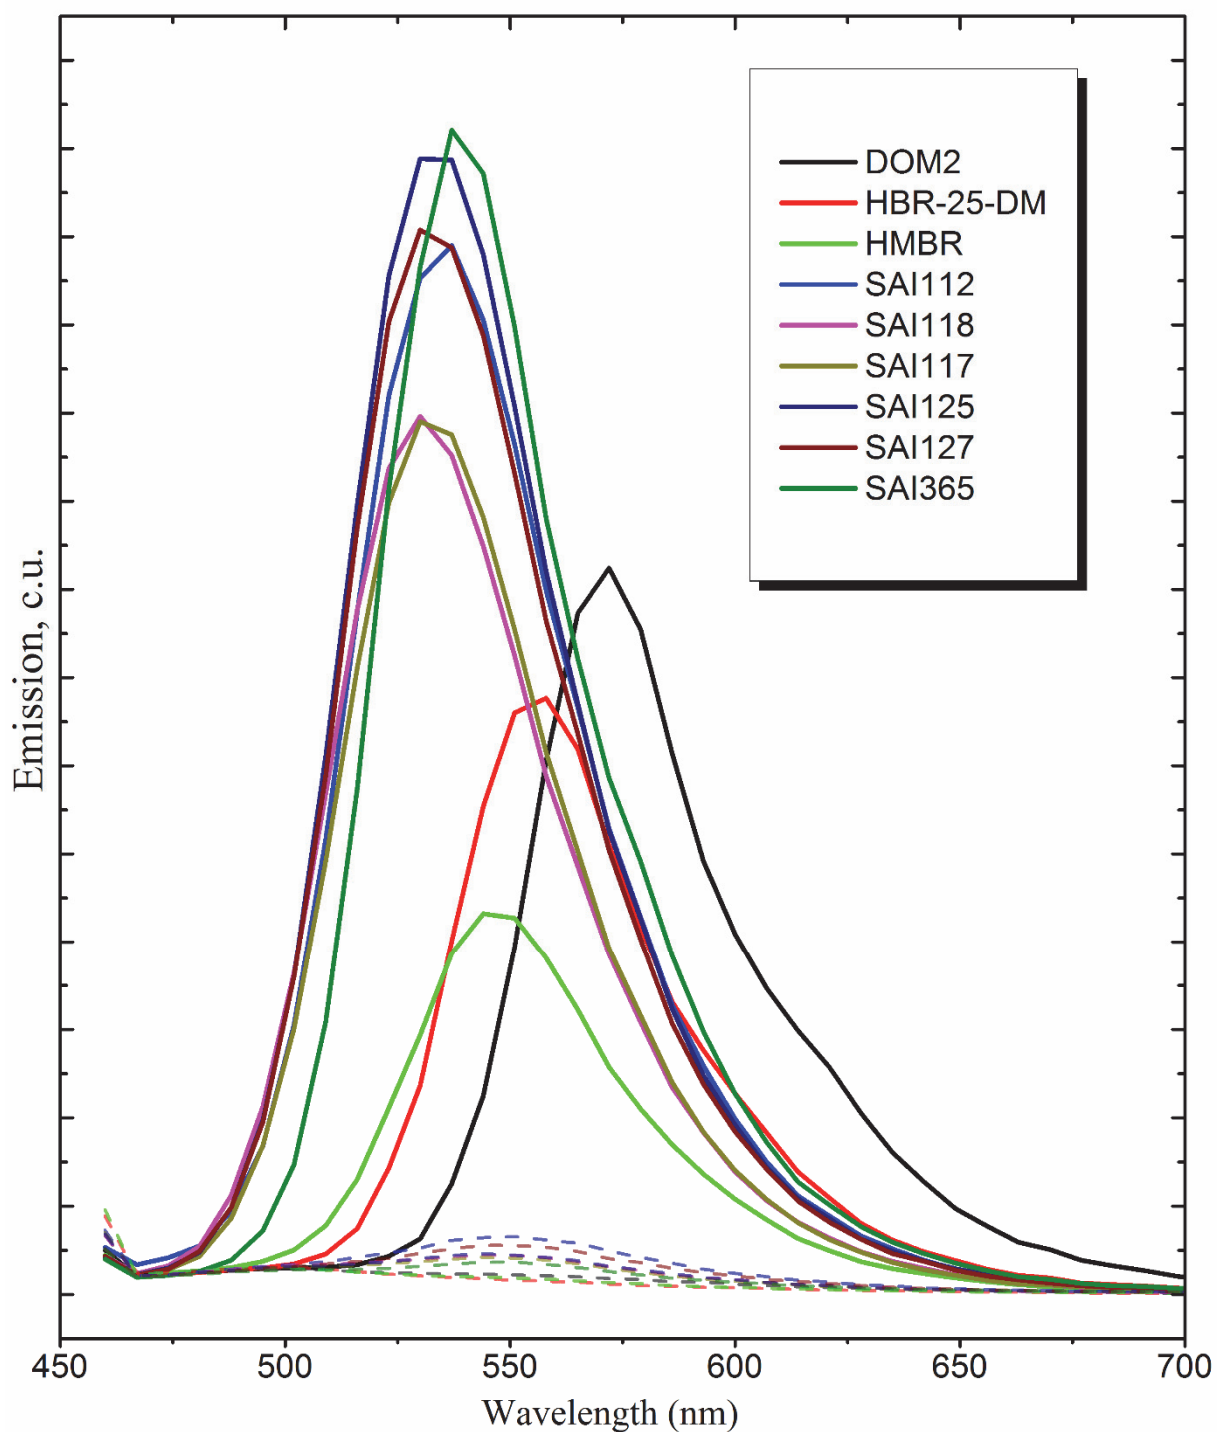

**Figure S2.1.** Emission spectra of various compounds in bound (solid lines) with nano-redFAST protein and free (dash lines) forms obtained from plate reader screening. The spectra are presented as is, without normalization (see the relevant part of the Methods section). Solutions with a concentration of 10  $\mu\text{M}$  of corresponding fluorogens and 1  $\mu\text{M}$  of nanoFAST variants in the PBS buffer were used.

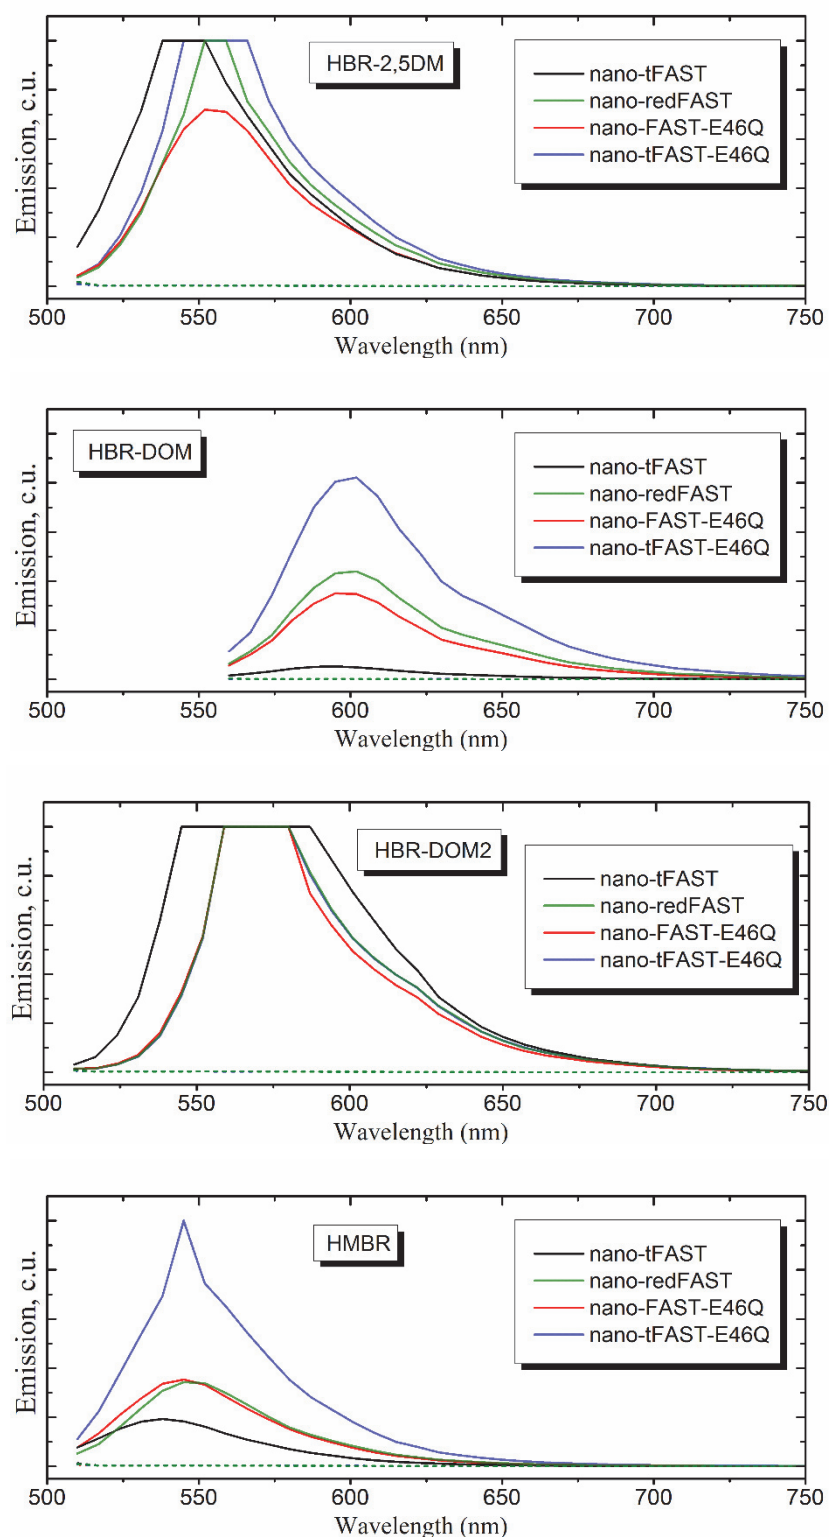

**Figure S2.2.** Emission spectra of various compounds in bound (solid lines) with nanoFAST variants and free (dash lines) forms obtained from plate reader screening. The spectra are presented as is, without normalization (see the relevant part of the Methods section). Solutions with a concentration of 10  $\mu\text{M}$  of corresponding fluorogens and 1  $\mu\text{M}$  of nanoFAST variants in the PBS buffer were used.

### 3. Determination of affinity constants

**Table S3.1.** Dissociation constants values of complexes [mutant-**HBR-DOM2**]

| <b>Mutant</b>                                    | <b>K<sub>D</sub>, μM</b> |
|--------------------------------------------------|--------------------------|
| <b>nano-iFAST</b>                                | 1.19±0.06                |
| <b>nano-frFAST</b>                               | 1.12±0.22                |
| <b>nano-pFAST</b>                                | 0.074±0.016              |
| <b>nano-tFAST</b>                                | 0.19±0.02                |
| <b>nano-redFAST</b>                              | 0.70±0.13                |
| <b>nanoFAST-E46Q</b>                             | 0.43±0.05                |
| <b>nano tFAST-E46Q</b>                           | 0.13±0.01                |
| K <sub>D</sub> of complexes of others mutants >3 |                          |



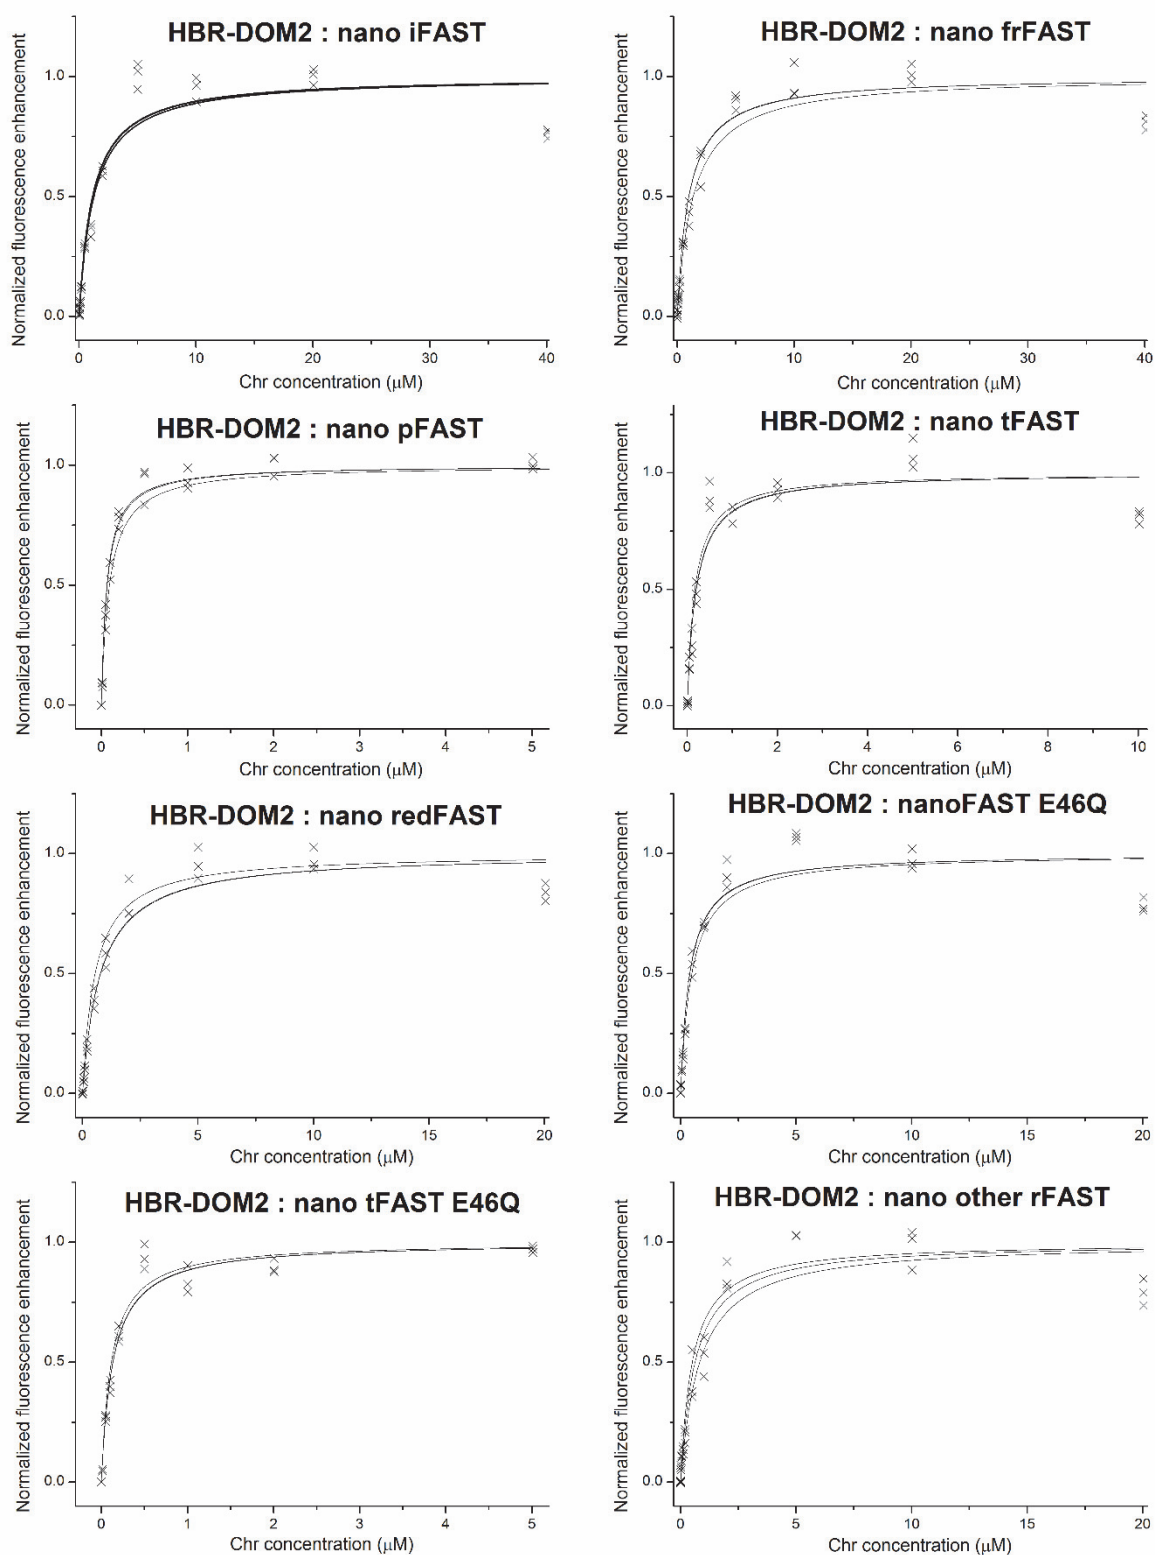

**Figure S3.1.** The graphs show the bound fraction for various **HBR-DOM2** concentrations.

**Table S3.2.** Dissociation constants values of complexes [mutant-**HBR-2,5-DM**]

| Mutant                 | $K_D, \mu\text{M}$ |
|------------------------|--------------------|
| <b>nano-tFAST</b>      | $0.93 \pm 0.19$    |
| <b>nano-redFAST</b>    | $1.26 \pm 0.33$    |
| <b>nano-tFAST E46Q</b> | $0.50 \pm 0.16$    |

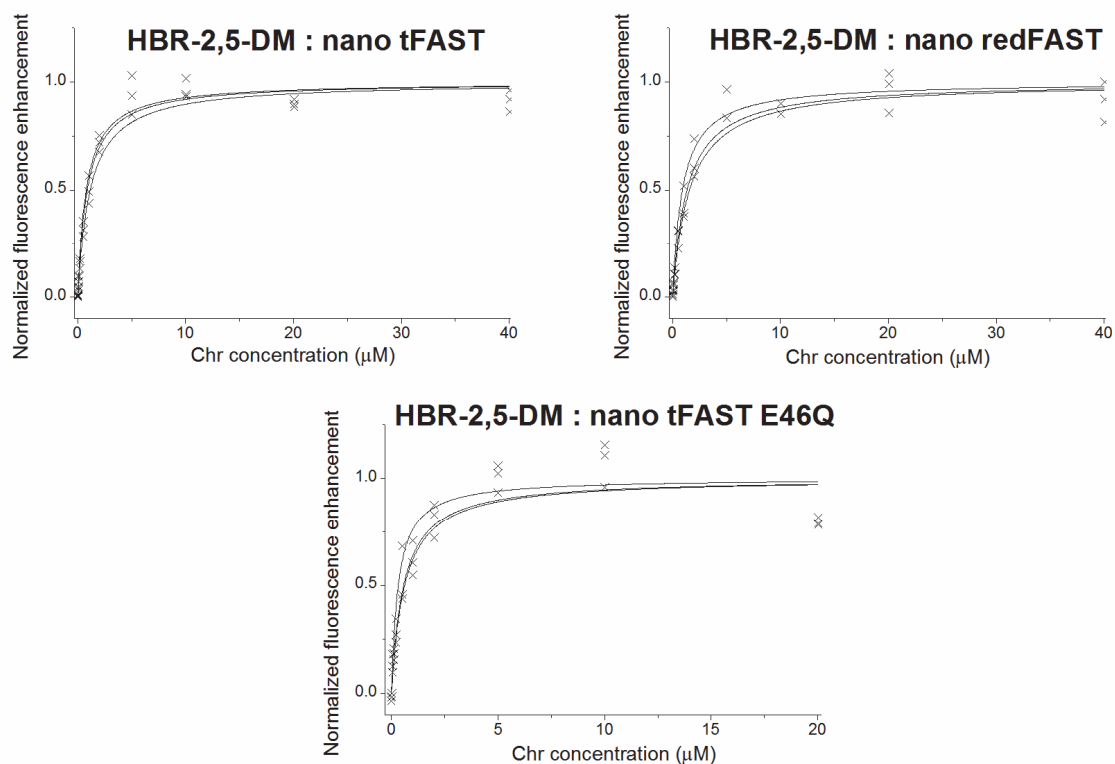

**Figure S3.2.** The graphs show the bound fraction for various **HBR-2,5-DM** concentrations.

**Table S3.3.** Dissociation constants values of complexes [mutant-HMBR]

| Mutant          | $K_D, \mu\text{M}$ |
|-----------------|--------------------|
| nano-redFAST    | >3                 |
| nano-tFAST-E46Q | >3                 |

**Table S3.4.** Dissociation constants values of complexes [mutant-HBR-DOM]

| Mutant          | $K_D, \mu\text{M}$ |
|-----------------|--------------------|
| nano-redFAST    | >3                 |
| nano-tFAST-E46Q | $1.69 \pm 0.32$    |

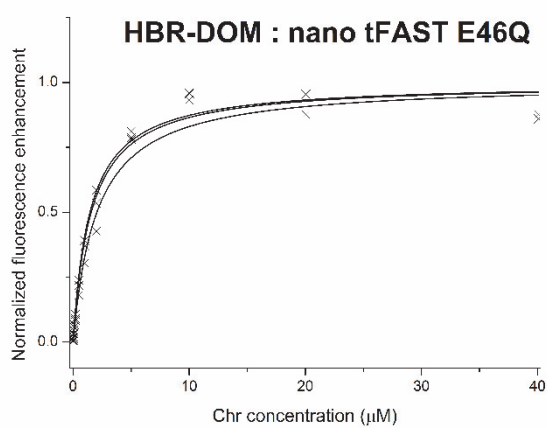**Figure S3.3.** The graph shows the bound fraction for various **HBR-DOM** concentrations.

**Table S3.5.** Dissociation constants values of complexes [**nano-tFAST**-chromophore]

| Chromophore | $K_D, \mu\text{M}$ |
|-------------|--------------------|
| HBR-DOM2    | $0.19 \pm 0.02$    |
| HBR-2,5-DM  | $0.93 \pm 0.19$    |

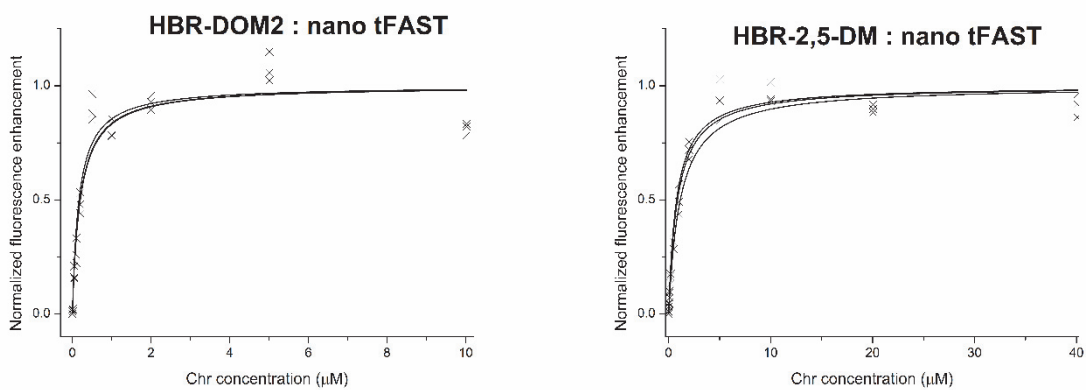

**Figure S3.4.** The graph shows the bound fraction for various chromophore concentrations.

**Table S3.6.** Dissociation constants values of complexes [**nano-redFAST**- chromophore]

| Chromophore | Enhancement<br>in screening | Structure                                                                             | K <sub>D</sub> , μM |
|-------------|-----------------------------|---------------------------------------------------------------------------------------|---------------------|
| HBR-DOM2    | >400                        | 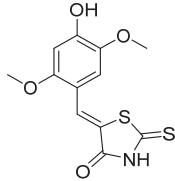   | 0.69±0.08           |
| HBR-2,5-DM  | 194                         |    | 1.23±0.13           |
| HMBR        | 55                          |    | >3                  |
| HBR-DOM     | 205                         |   | >3                  |
| SAI 112     | >65                         |  | 0.055±0.018         |
| SAI 118     | 50                          |  | 0.27±0.08           |
| SAI 199     | 52                          |  | 0.16±0.04           |
| SAI 117     | 52                          |  | 0.27±0.06           |
| SAI 125     | 67                          |  | 0.59±0.11           |

|         |      |                                                                                     |             |
|---------|------|-------------------------------------------------------------------------------------|-------------|
| SAI 127 | >70  | 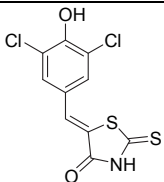 | 0.041±0.004 |
| SAI 366 | >89  |  | 0.022±0.008 |
| SAI 362 | >105 |  | 1.01±0.10   |
| SAI 365 | >87  |  | 0.026±0.009 |

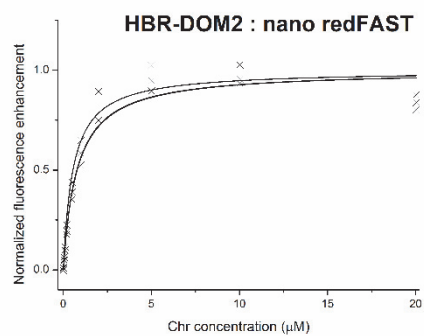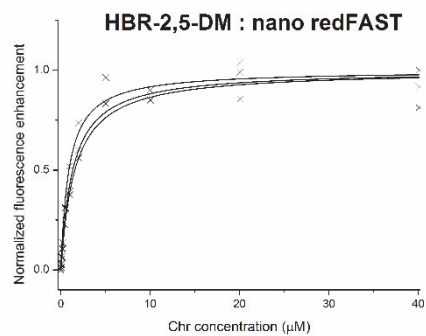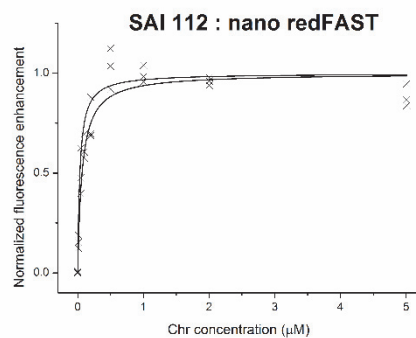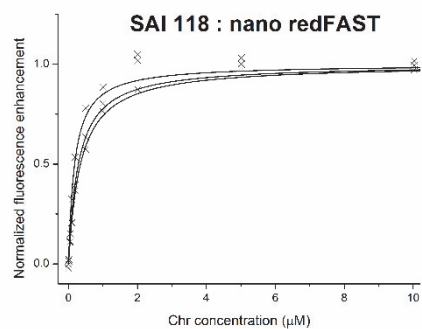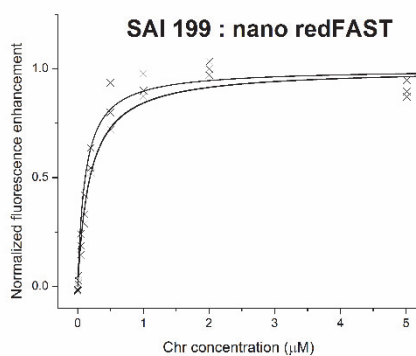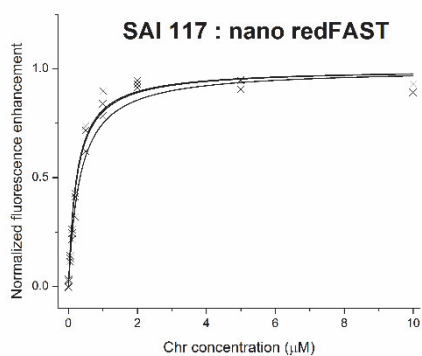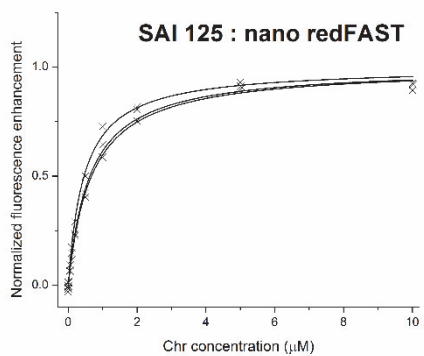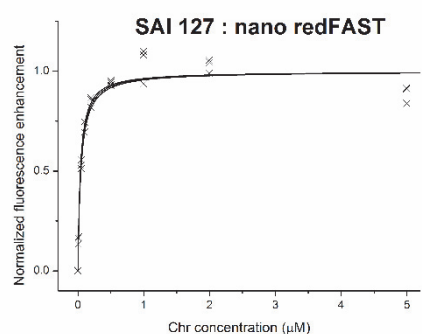

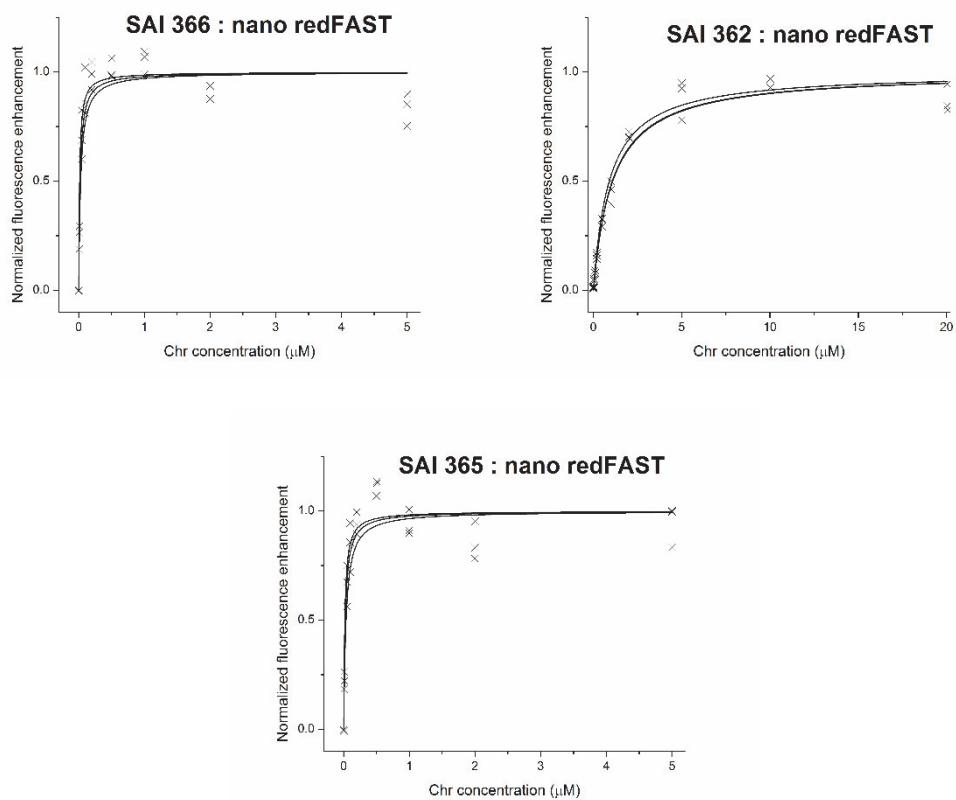

**Figure S3.5.** The graph shows the bound fraction for various chromophore concentrations.



**Table S3.7.** Dissociation constants values of complexes [**nano-tFAST-E46Q**-chromophore]

| Chromophore       | $K_D, \mu\text{M}$ |
|-------------------|--------------------|
| <b>HBR-DOM2</b>   | $0.13 \pm 0.01$    |
| <b>HBR-2,5-DM</b> | $0.50 \pm 0.16$    |
| <b>HMBR</b>       | $>3$               |
| <b>HBR-DOM</b>    | $1.69 \pm 0.32$    |

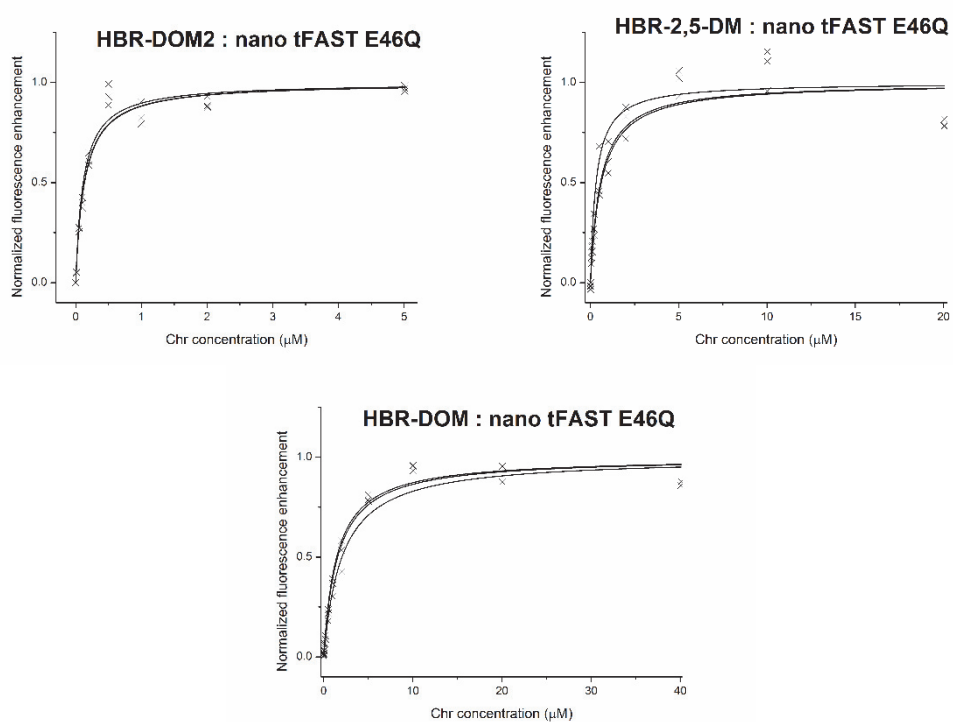

**Figure S3.6.** The graph shows the bound fraction for various chromophore concentrations.

## 4. Fluorescence Lifetime Measurements

**Table S.4.1.** Fluorescence lifetimes ( $\tau$ ) of **HBR-DOM2**, **HBR-DOM**, and **HBR-2,5-DM** fluorogen in complexes with nanoFAST variants.  $\tau$  is the fluorescence lifetime of the corresponding exponential component; A is a relative contribution of the exponential decay component;  $\chi^2$  is a value of the Pearson's chi-squared test.

| Fluorogen         | FAST variant           | $\tau_1 \pm \text{SD, ns}$ | $A_1, \%$ | $\tau_2 \pm \text{SD, ns}$ | $A_2, \%$ | $\chi^2$ |
|-------------------|------------------------|----------------------------|-----------|----------------------------|-----------|----------|
| <b>HBR-DOM2</b>   | <b>nanoFAST</b>        | $0.095 \pm 0.008$          | 4         | $3.802 \pm 0.007$          | 96        | 1.166    |
|                   | <b>nano-iFAST</b>      | $0.106 \pm 0.008$          | 4         | $3.644 \pm 0.007$          | 96        | 1.182    |
|                   | <b>nano-redFAST</b>    | $0.091 \pm 0.008$          | 3         | $3.993 \pm 0.007$          | 97        | 1.196    |
|                   | <b>nano tFAST</b>      | $0.090 \pm 0.009$          | 4         | $3.920 \pm 0.007$          | 96        | 1.226    |
|                   | <b>nano tFAST-E46Q</b> | $0.100 \pm 0.008$          | 3         | $4.038 \pm 0.007$          | 97        | 1.196    |
| <b>HBR-DOM</b>    | <b>nano tFAST-E46Q</b> | $0.121 \pm 0.008$          | 5         | $3.377 \pm 0.007$          | 95        | 1.172    |
| <b>HBR-2,5-DM</b> | <b>nano tFAST-E46Q</b> | $0.102 \pm 0.007$          | 7         | $2.399 \pm 0.006$          | 93        | 1.200    |

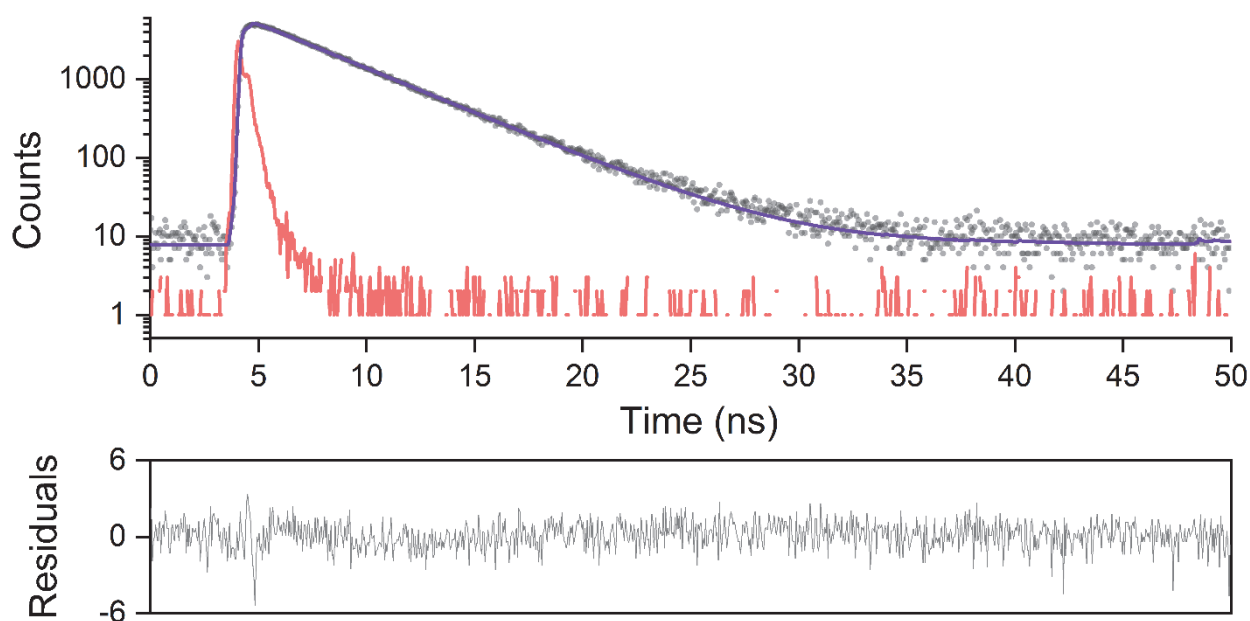

**Figure S4.1.** Fluorescence decay kinetics of the **HBR-DOM2** fluorogen bound by nanoFAST. Gray dots represent experimental decay data (photon arrivals), violet line shows exponential fit of the data, red curve denotes instrument response function (IRF). Residuals of fitting results are shown below.

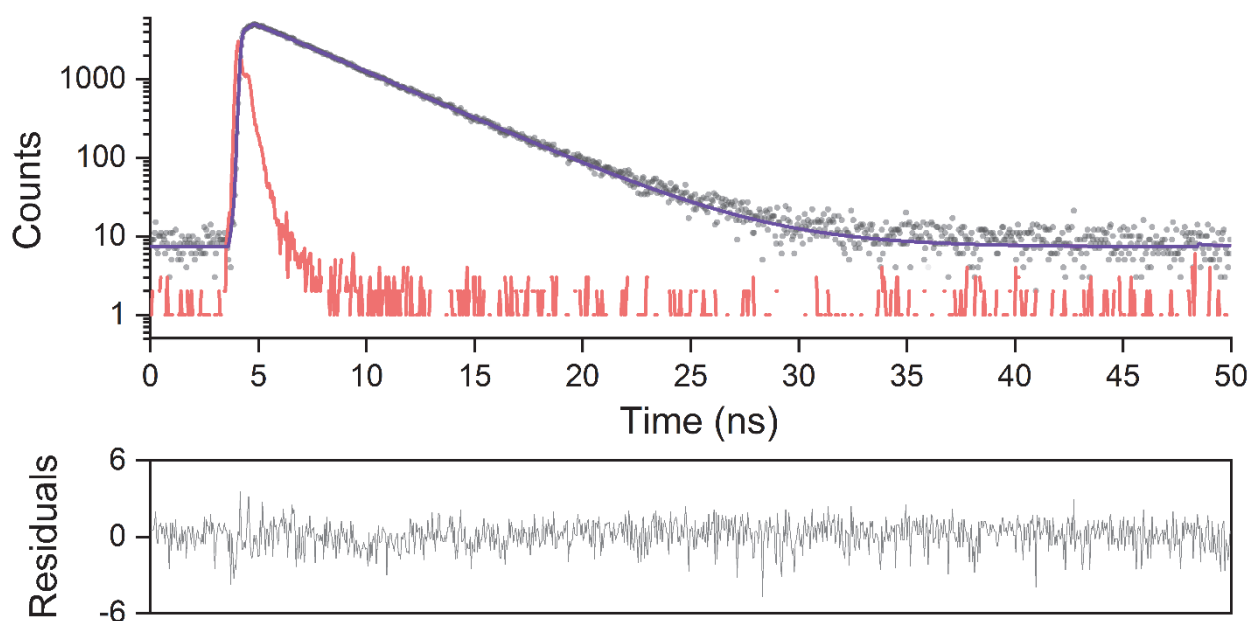

**Figure S4.2.** Fluorescence decay kinetics of the **HBR-DOM2** fluorogen bound by nano-iFAST. Gray dots represent experimental decay data (photon arrivals), violet line shows exponential fit of the data, red curve denotes instrument response function (IRF). Residuals of fitting results are shown below.

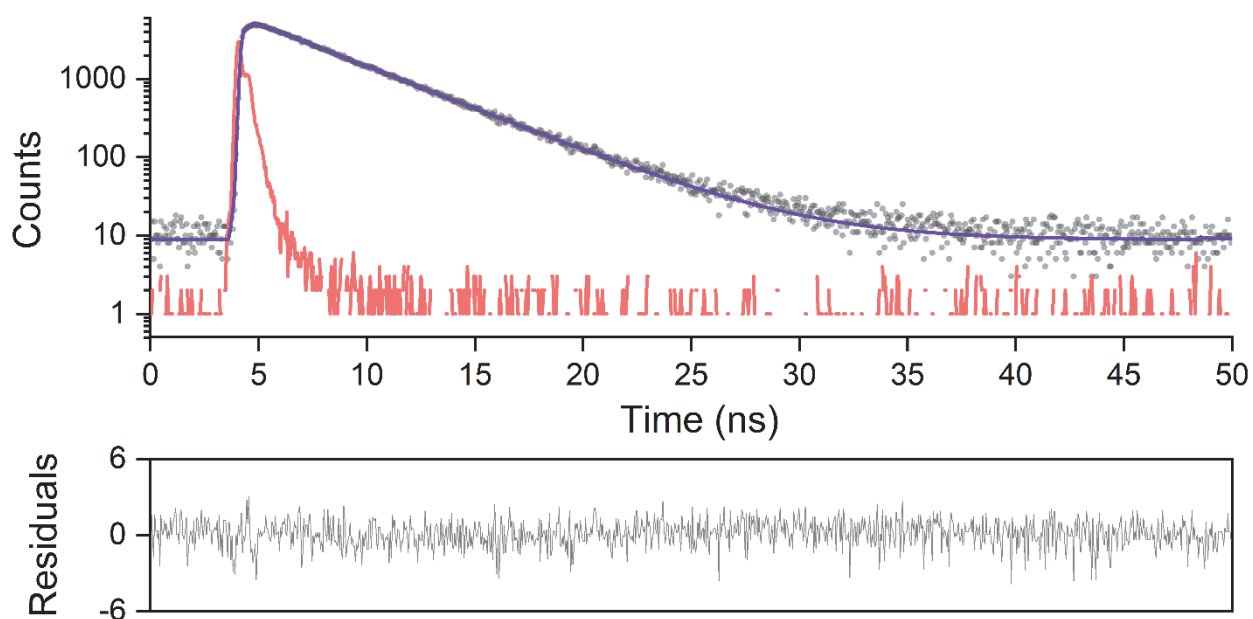

**Figure S4.3.** Fluorescence decay kinetics of the **HBR-DOM2** fluorogen bound by nano-redFAST. Gray dots represent experimental decay data (photon arrivals), violet line shows exponential fit of the data, red curve denotes instrument response function (IRF). Residuals of fitting results are shown below.

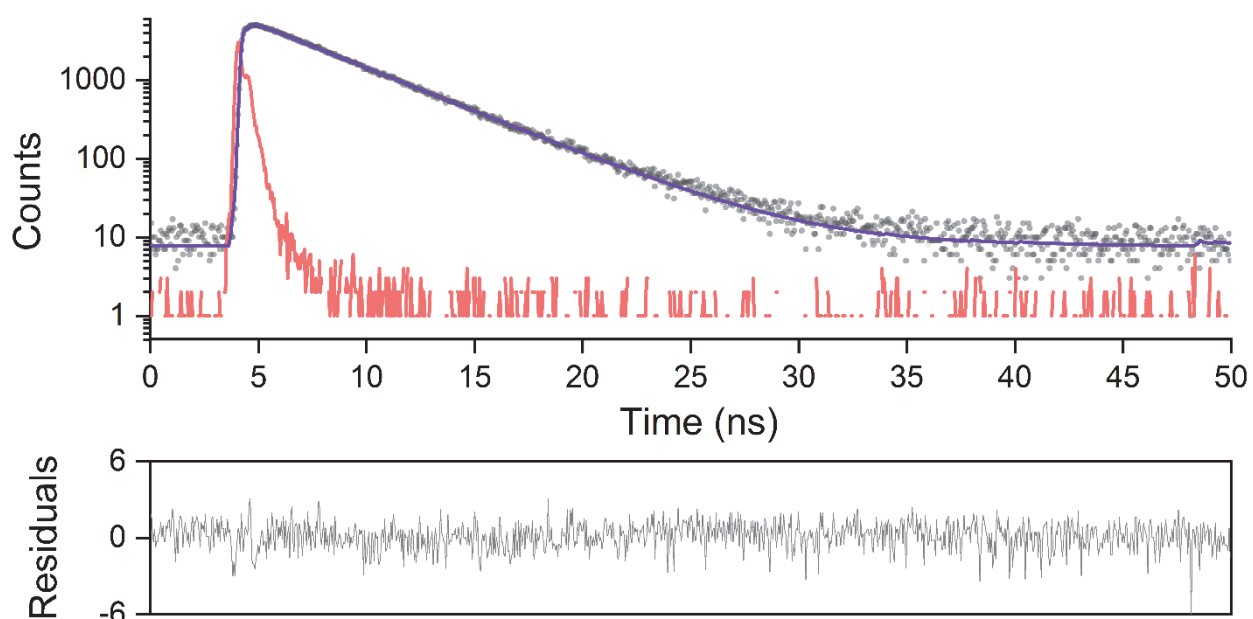

**Figure S4.4.** Fluorescence decay kinetics of the **HBR-DOM2** fluorogen bound by nano-tFAST. Gray dots represent experimental decay data (photon arrivals), violet line shows exponential fit of the data, red curve denotes instrument response function (IRF). Residuals of fitting results are shown below.

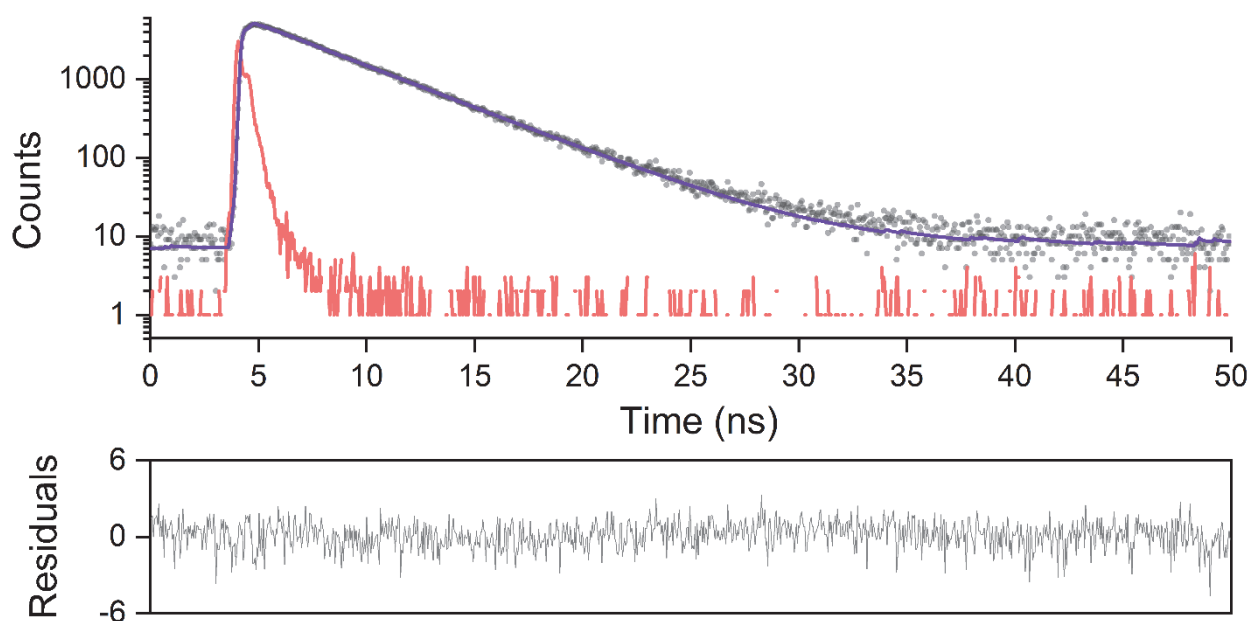

**Figure S4.5.** Fluorescence decay kinetics of the **HBR-DOM2** fluorogen bound by nano-tFAST-E46Q. Gray dots represent experimental decay data (photon arrivals), violet line shows exponential fit of the data, red curve denotes instrument response function (IRF). Residuals of fitting results are shown below.

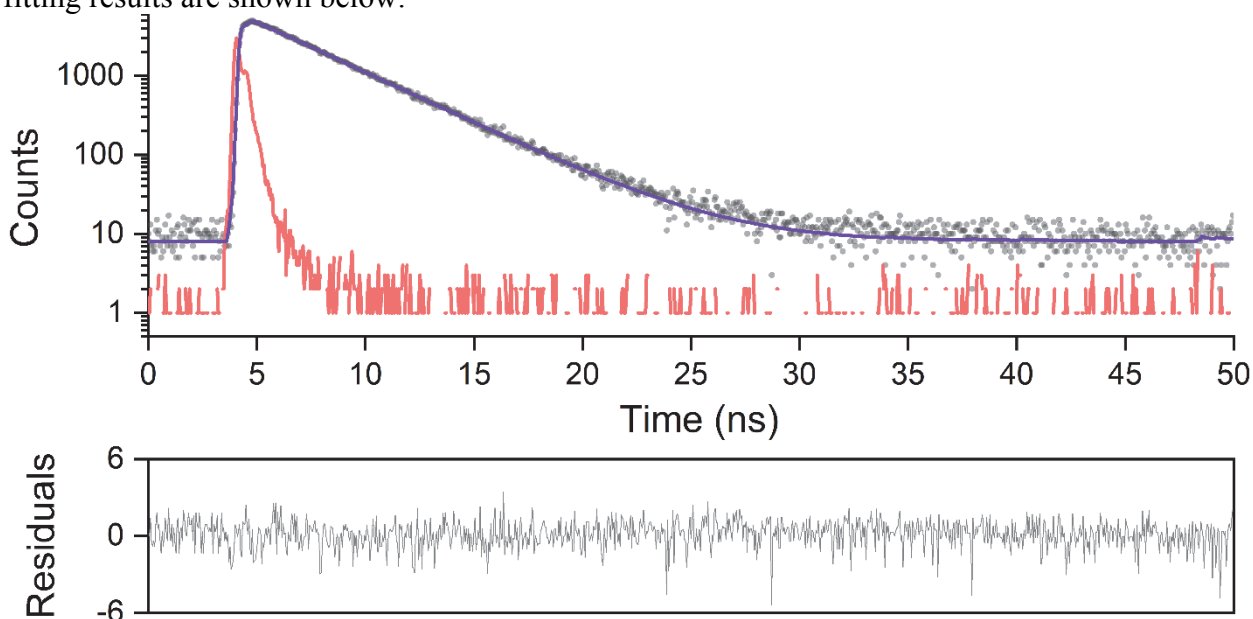

**Figure S4.6.** Fluorescence decay kinetics of the **HBR-DOM** fluorogen bound by nano-tFAST-E46Q. Gray dots represent experimental decay data (photon arrivals), violet line shows exponential fit of the data, red curve denotes instrument response function (IRF). Residuals of fitting results are shown below.

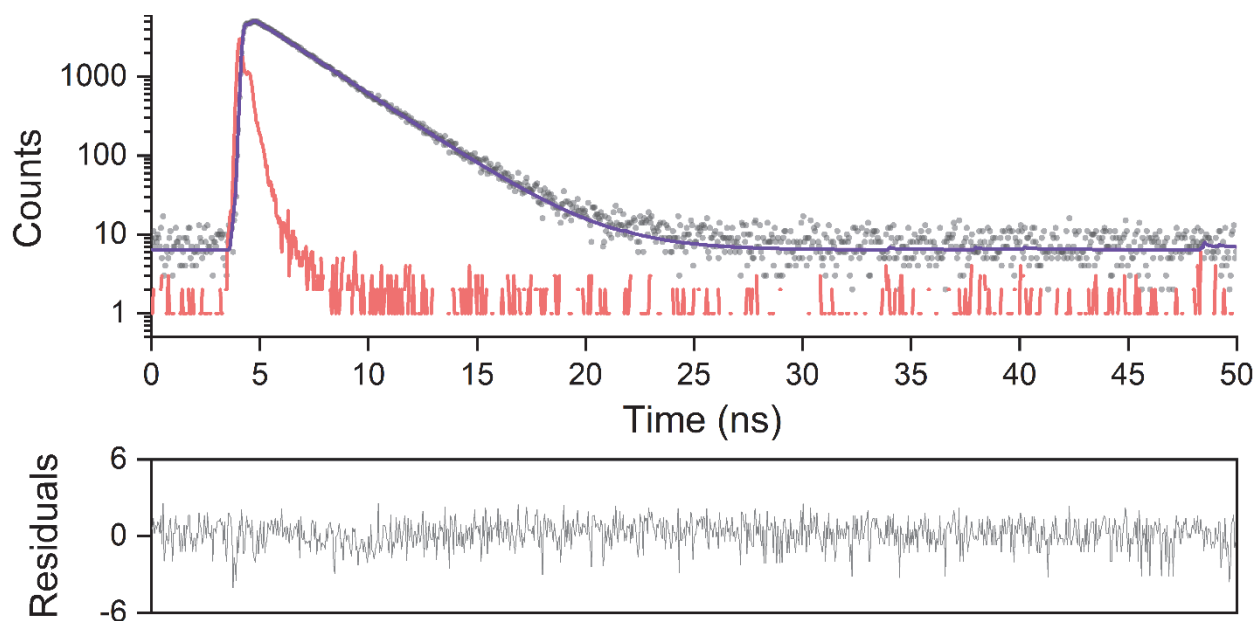

**Figure S4.7.** Fluorescence decay kinetics of the **HBR-2,5DM** fluorogen bound by nano-tFAST-E46Q. Gray dots represent experimental decay data (photon arrivals), violet line shows exponential fit of the data, red curve denotes instrument response function (IRF). Residuals of fitting results are shown below.

## 5. Spectra of complexes

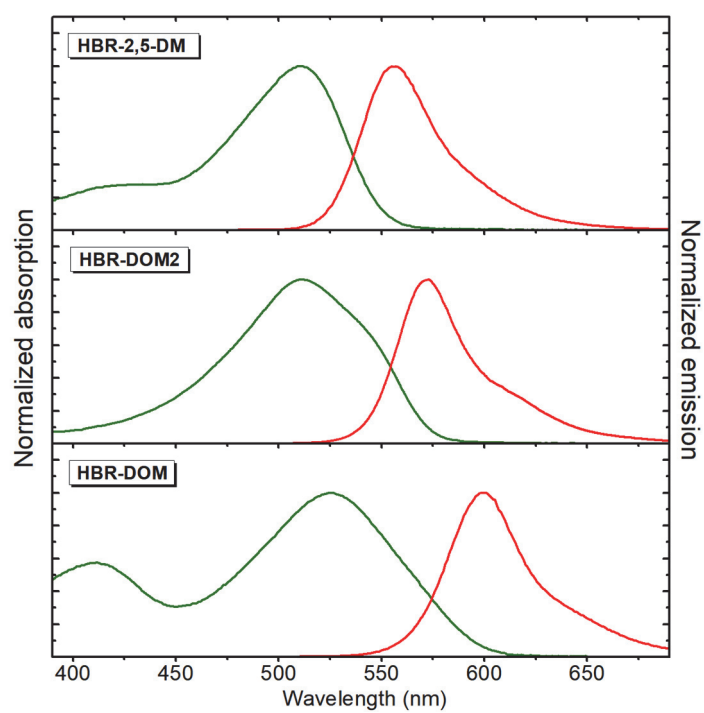

**Figure S5.1.** The absorption (green) and emission (red) spectra of various chromophores in complexes with nano-tFAST-E46Q.

## 6. Fluorescent microscopy

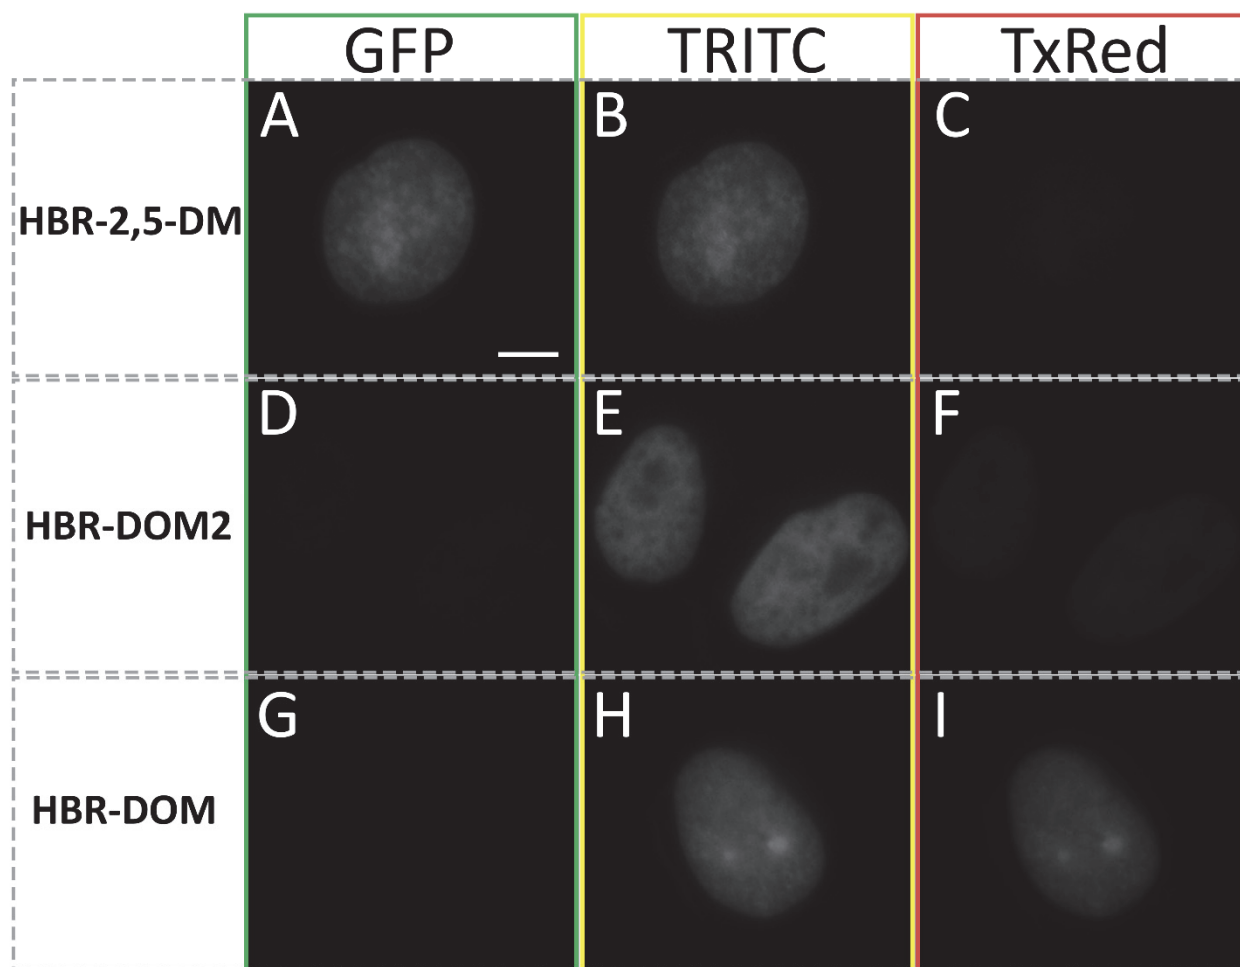

**Figure S6.1.** Live-cell imaging with a set of fluorogens using different filter sets. HeLa Kyoto cells transiently transfected with nano-tFast-E46Q-H2B. Cells were imaged using GFP filter (A, D, G), TRITC filter (B, E, H), and TxRed filter (C, F, I) in the presence of 5  $\mu$ M **HBR-2,5-DM** (A, B, C), 5  $\mu$ M **HBR-DOM2** (D, E, F), and 5  $\mu$ M **HBR-DOM** (G, H, I). The scale bar is 10  $\mu$ m. Imaging conditions, e.g. light intensity, gain, and exposure time for every filter set, were kept constant.



## 7. Compounds description

### **(Z)-5-(4-hydroxybenzylidene)-2-thioxothiazolidin-4-ones**

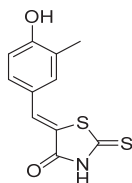

### **(Z)-5-(4-Hydroxy-3-methylbenzylidene)-2-thioxothiazolidin-4-one (HMBR)**

Previously characterized. Spectral properties correspond to the previously reported.[3]

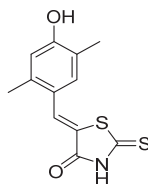

### **(Z)-5-(4-Hydroxy-2,5-dimethylbenzylidene)-2-thioxothiazolidin-4-one (HBR-2,5-DM)**

Previously characterized. Spectral properties correspond to the previously reported.[4]

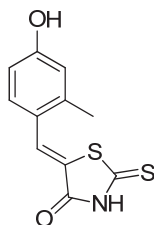

### **(Z)-5-(4-Hydroxy-2-methylbenzylidene)-2-thioxothiazolidin-4-one (SAI458)**

Yield 204 mg (27%). Orange solid. M.p. over 250°C.

E/Z isomerism is observed for this compound. A description for the major isomer is given below.

$^1\text{H}$  NMR (700 MHz, DMSO- $d_6$ )  $\delta$  13.69 (brs, 1H), 10.24 (s, 1H), 7.67 (s, 1H), 7.25 (d,  $J$  = 8.5 Hz, 1H), 6.79 (dd,  $J$  = 8.5, 2.6 Hz, 1H), 6.75 (d,  $J$  = 2.6 Hz, 1H), 2.37 (s, 3H).

$^{13}\text{C}$  NMR (176 MHz, DMSO- $d_6$ )  $\delta$  195.8, 169.3, 160.1, 142.1, 130.1, 129.4, 122.7, 122.0, 118.0, 114.2, 19.5,

HRMS (ESI)  $m/z$   $[\text{M}+\text{H}]^+$  calcd for  $\text{C}_{11}\text{H}_{10}\text{NO}_2\text{S}_2$ : 252.0147, found: 252.0147.

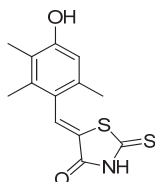

### **(Z)-5-(4-Hydroxy-2,3,6-trimethylbenzylidene)-2-thioxothiazolidin-4-one (SAI459)**

Yield 142 mg (17%). Orange solid. M.p. 246-248°C.

E/Z isomerism is observed for this compound. A description for the major isomer is given below.

$^1\text{H}$  NMR (700 MHz, DMSO- $d_6$ )  $\delta$  13.64 (brs, 1H), 9.47 (s, 1H), 7.68 (s, 1H), 6.58 (s, 1H), 2.10 (s, 3H), 2.07 (s, 3H), 2.03 (s, 3H).

$^{13}\text{C}$  NMR (176 MHz, DMSO- $d_6$ )  $\delta$  196.4, 167.8, 155.8, 135.1, 134.0, 133.3, 130.9, 124.2, 120.7, 114.2, 19.8, 17.1, 11.5,

HRMS (ESI)  $m/z$   $[\text{M}+\text{H}]^+$  calcd for  $\text{C}_{13}\text{H}_{14}\text{NO}_2\text{S}_2$ : 280.0460, found: 280.0454.

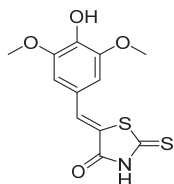

**(Z)-5-(4-Hydroxy-3,5-dimethoxybenzylidene)-2-thioxothiazolidin-4-one (HBR-DOM)**

Previously characterized. Spectral properties correspond to the previously reported.[4]

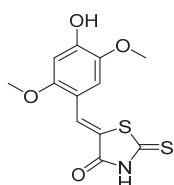

**(Z)-5-(4-Hydroxy-2,5-dimethoxybenzylidene)-2-thioxothiazolidin-4-one (HBR-DOM2)**

Previously characterized. Spectral properties correspond to the previously reported.[2]

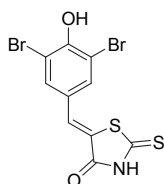

**(Z)-5-(3,5-Dibromo-4-hydroxybenzylidene)-2-thioxothiazolidin-4-one (SAI112)**

Previously characterized. Spectral properties correspond to the previously reported.[2]

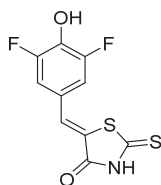

**(Z)-5-(3,5-Difluoro-4-hydroxybenzylidene)-2-thioxothiazolidin-4-one (SAI118)**

Previously characterized. Spectral properties correspond to the previously reported.[2]

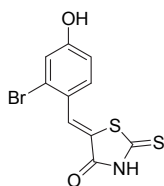

**(Z)-5-(2-Bromo-4-hydroxybenzylidene)-2-thioxothiazolidin-4-one (SAI122)**

Previously characterized. Spectral properties correspond to the previously reported.[2]

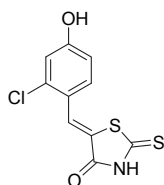

**(Z)-5-(2-Chloro-4-hydroxybenzylidene)-2-thioxothiazolidin-4-one (SAI199)**

Previously characterized. Spectral properties correspond to the previously reported.[2]

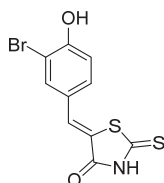

**(Z)-5-(3-Bromo-4-hydroxybenzylidene)-2-thioxothiazolidin-4-one (SAI117)**

Previously characterized. Spectral properties correspond to the previously reported.[2]

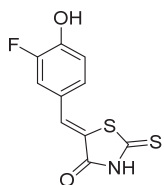

**(Z)-5-(3-Fluoro-4-hydroxybenzylidene)-2-thioxothiazolidin-4-one (SAI121)**

Previously characterized. Spectral properties correspond to the previously reported.[2]

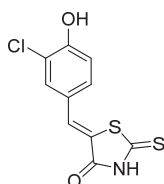

**(Z)-5-(3-Chloro-4-hydroxybenzylidene)-2-thioxothiazolidin-4-one (SAI125)**

Previously characterized. Spectral properties correspond to the previously reported.[2]

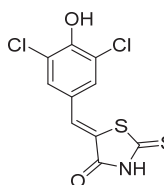

**(Z)-5-(3,5-Dichloro-4-hydroxybenzylidene)-2-thioxothiazolidin-4-one (SAI127)**

Previously characterized. Spectral properties correspond to the previously reported.[2]

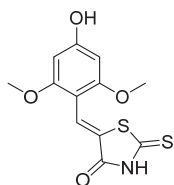

**(Z)-5-(4-Hydroxy-2,6-dimethoxybenzylidene)-2-thioxothiazolidin-4-one (SAI363)**

Previously characterized. Spectral properties correspond to the previously reported.[2]

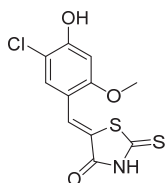

**(Z)-5-(5-Chloro-4-hydroxy-2-methoxybenzylidene)-2-thioxothiazolidin-4-one (SAI366)**

Previously characterized. Spectral properties correspond to the previously reported.[2]

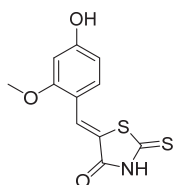

**(Z)-5-(4-Hydroxy-2-methoxybenzylidene)-2-thioxothiazolidin-4-one (SAI362)**

Previously characterized. Spectral properties correspond to the previously reported.[2]

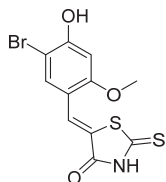

**(Z)-5-(5-Bromo-4-hydroxy-2-methoxybenzylidene)-2-thioxothiazolidin-4-one (SAI365)**

Previously characterized. Spectral properties correspond to the previously reported.[2]

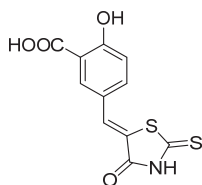

**(Z)-2-Hydroxy-5-((4-oxo-2-thioxothiazolidin-5-ylidene)methyl)benzoic acid (SAI120)**

Previously characterized. Spectral properties correspond to the previously reported.[2]

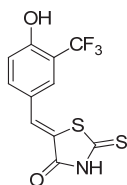

**(Z)-5-(4-Hydroxy-3-(trifluoromethyl)benzylidene)-2-thioxothiazolidin-4-one (SAI379)**

Yield 198 mg (22%). Yellow solid. M.p. 254-256°C.

$^1\text{H}$  NMR (700 MHz, DMSO- $d_6$ )  $\delta$  7.18 (d,  $J$  = 8.7 Hz, 1H), 7.63 (s, 1H), 7.66 (dd,  $J$  = 8.7, 2.3 Hz, 1H), 7.79 (d,  $J$  = 2.4 Hz, 1H), 11.50 (brs, 1H), 13.76 (brs, 1H).

$^{13}\text{C}$  NMR (176 MHz, DMSO- $d_6$ )  $\delta$  116.5 (q,  $J$  = 30.5 Hz), 118.2, 123.1, 123.4 (q,  $J$  = 272.4 Hz), 123.8, 130.2 (q,  $J$  = 4.8 Hz), 130.9, 135.3, 157.9, 169.3, 195.2.

HRMS (ESI)  $m/z$   $[\text{M}+\text{H}]^+$  calcd for  $\text{C}_{11}\text{H}_7\text{F}_3\text{NO}_2\text{S}_2$ : 305.9865, found: 305.9866.

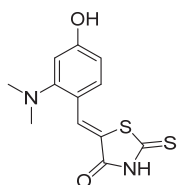

**(Z)-5-(2-(Dimethylamino)-4-hydroxybenzylidene)-2-thioxothiazolidin-4-one (SAI 367)**

Previously characterized. Spectral properties correspond to the previously reported.[2]

### 5-(4-hydroxybenzylidene)-2-thioxoimidazolidin-4-ones

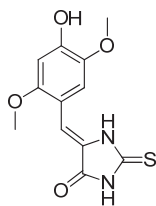

#### (Z)-5-(4-Hydroxy-2,5-dimethoxybenzylidene)-2-thioxoimidazolidin-4-one (SAI472)

The dried precipitate was subject to flash column chromatography (gradient elution with  $\text{CHCl}_3$  to  $\text{CHCl}_3/\text{MeOH}$ , 100:4). Yield 160 mg (19%). Orange solid. M.p. over  $250^\circ\text{C}$ .

E/Z isomerism is observed for this compound. A description for the major isomer is given below.

$^1\text{H}$  NMR (700 MHz,  $\text{DMSO}-d_6$ )  $\delta$  12.19 (s, 1H), 11.98 (s, 1H), 9.77 (s, 1H), 7.19 (s, 1H), 6.71 (s, 1H), 6.54 (s, 1H), 3.84 (s, 3H), 3.77 (s, 3H).

$^{13}\text{C}$  NMR (176 MHz,  $\text{DMSO}-d_6$ )  $\delta$  177.8, 165.8, 153.9, 150.5, 141.8, 124.9, 114.4, 111.2, 107.4, 100.2, 57.0, 56.0.

HRMS (ESI)  $m/z$   $[\text{M}+\text{H}]^+$  calcd for  $\text{C}_{12}\text{H}_{13}\text{N}_2\text{O}_4\text{S}$ : 281.0591, found: 281.0590.

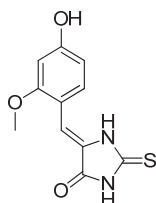

#### (Z)-5-(4-Hydroxy-2-methoxybenzylidene)-2-thioxoimidazolidin-4-one (SAI499)

Yield 240 mg (32%). Brown solid. M.p. over  $250^\circ\text{C}$ .

$^1\text{H}$  NMR (700 MHz,  $\text{DMSO}-d_6$ )  $\delta$  12.17 (s, 1H), 11.81 (s, 1H), 10.10 (brs, 1H), 7.65 (d,  $J = 8.5$  Hz, 1H), 6.69 (s, 1H), 6.45 (d,  $J = 2.3$  Hz, 1H), 6.42 (dd,  $J = 8.5, 2.3$  Hz, 1H), 3.81 (s, 3H).

$^{13}\text{C}$  NMR (75 MHz,  $\text{DMSO}-d_6$ )  $\delta$  177.8, 165.8, 161.0, 159.5, 131.5, 125.0, 112.2, 108.0, 107.2, 99.0, 55.6.

HRMS (ESI)  $m/z$   $[\text{M}+\text{H}]^+$  calcd for  $\text{C}_{11}\text{H}_{11}\text{N}_2\text{O}_3\text{S}$ : 251.0485, found: 251.0483.

### 5-(4-hydroxybenzylidene)-imidazolidine-2,4-diones

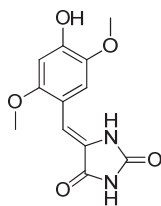

#### (Z)-5-(4-Hydroxy-2,5-dimethoxybenzylidene)imidazolidine-2,4-dione (SAI503)

Yield 274 mg (52%). Yellow solid. M.p. over 250°C.

$^1\text{H}$  NMR (700 MHz, DMSO- $d_6$ )  $\delta$  11.05 (brs, 1H), 10.32 (brs, 1H), 9.52 (brs, 1H), 7.04 (s, 1H), 6.62 (s, 1H), 6.53 (s, 1H), 3.81 (s, 3H), 3.75 (s, 3H).

$^{13}\text{C}$  NMR (75 MHz, DMSO- $d_6$ )  $\delta$  165.7, 155.7, 153.0, 149.2, 141.6, 125.3, 113.4, 111.7, 104.0, 100.3, 56.7, 56.0.

HRMS (ESI)  $m/z$   $[\text{M}+\text{H}]^+$  calcd for  $\text{C}_{12}\text{H}_{13}\text{N}_2\text{O}_5$ : 265.0819, found: 265.0818.

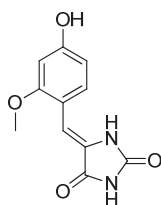

#### (Z)-5-(4-Hydroxy-2-methoxybenzylidene)imidazolidine-2,4-dione (SAI487)

Yield 84 mg (18%). Brown solid. M.p. 237-239°C.

$^1\text{H}$  NMR (700 MHz, DMSO- $d_6$ )  $\delta$  10.21 (brs, 3H), 7.45 (d,  $J$  = 8.4 Hz, 1H), 6.61 (s, 1H), 6.44 (d,  $J$  = 2.3 Hz, 1H), 6.39 (dd,  $J$  = 8.4, 2.3 Hz, 1H), 3.79 (s, 3H).

$^{13}\text{C}$  NMR (176 MHz, DMSO- $d_6$ )  $\delta$  165.6, 159.8, 158.8, 155.4, 130.3, 125.3, 112.6, 107.7, 103.7, 99.0, 55.5.

HRMS (ESI)  $m/z$   $[\text{M}+\text{H}]^+$  calcd for  $\text{C}_{11}\text{H}_{11}\text{N}_2\text{O}_4$ : 235.0713, found: 235.0715.

### 5-(4-hydroxybenzylidene)-thiazolidine-2,4-diones

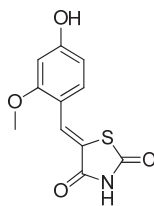

#### (Z)-5-(4-Hydroxy-2-methoxybenzylidene)thiazolidine-2,4-dione (SAI474)

Yield 452 mg (90%). Yellow solid.

$^1\text{H}$  NMR (700 MHz, DMSO- $d_6$ )  $\delta$  12.35 (brs, 1H), 10.36 (brs, 1H), 7.92 (s, 1H), 7.25 (d,  $J$  = 8.5 Hz, 1H), 6.53 (dd,  $J$  = 8.5, 2.3 Hz, 1H), 6.51 (d,  $J$  = 2.3 Hz, 1H), 3.83 (s, 3H).

Previously characterized. Spectral properties correspond to the previously reported.[5]

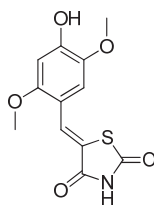

#### (Z)-5-(4-Hydroxy-2,5-dimethoxybenzylidene)thiazolidine-2,4-dione (SAI477)

Yield 472 mg (84%). Orange solid. M.p. over 250°C.

$^1\text{H}$  NMR (700 MHz, DMSO- $d_6$ )  $\delta$  12.37 (brs, 1H), 10.11 (s, 1H), 7.92 (s, 1H), 6.90 (s, 1H), 6.61 (s, 1H), 3.80 (s, 3H), 3.77 (s, 3H).

$^{13}\text{C}$  NMR (176 MHz, DMSO- $d_6$ )  $\delta$  168.1, 167.5, 154.4, 151.4, 142.0, 127.0, 118.4, 112.2, 111.5, 100.6, 56.2, 56.0.

HRMS (ESI)  $m/z$   $[\text{M}+\text{H}]^+$  calcd for  $\text{C}_{12}\text{H}_{12}\text{NO}_5\text{S}$ : 282.0431, found: 282.0430.



**5-(Z)-benzylidene-2-methyl-3-alkyl/aryl-3,5-dihydro-4H-imidazol-4-ones**

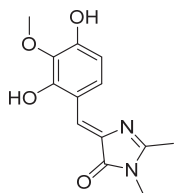

**(Z)-5-(2,4-Dihydroxy-3-methoxybenzylidene)-2,3-dimethyl-3,5-dihydro-4H-imidazol-4-one (N1042)**

Previously characterized. Spectral properties correspond to the previously reported.[2]

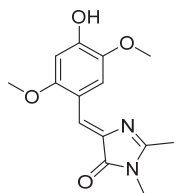

**(Z)-5-(4-Hydroxy-2,5-dimethoxybenzylidene)-2,3-dimethyl-3,5-dihydro-4H-imidazol-4-one (N1036)**

Previously characterized. Spectral properties correspond to the previously reported.[2]

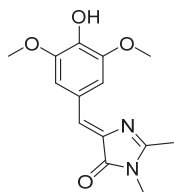

**(Z)-5-(4-Hydroxy-3,5-dimethoxybenzylidene)-2,3-dimethyl-3,5-dihydro-4H-imidazol-4-one (N979)**

Previously characterized. Spectral properties correspond to the previously reported.[2]

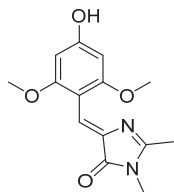

**(Z)-5-(4-Hydroxy-2,6-dimethoxybenzylidene)-2,3-dimethyl-3,5-dihydro-4H-imidazol-4-one (N976)**

Previously characterized. Spectral properties correspond to the previously reported.[2]

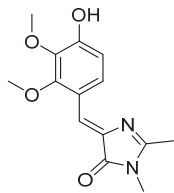

**(Z)-5-(4-Hydroxy-2,3-dimethoxybenzylidene)-2,3-dimethyl-3,5-dihydro-4H-imidazol-4-one (N1027)**

Previously characterized. Spectral properties correspond to the previously reported.[2]

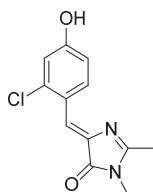

**(Z)-5-(2-Chloro-4-hydroxybenzylidene)-2,3-dimethyl-3,5-dihydro-4H-imidazol-4-one (N1179)**

Previously characterized. Spectral properties correspond to the previously reported.[2]

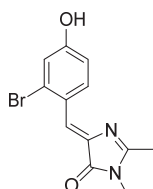

**(Z)-5-(2-Bromo-4-hydroxybenzylidene)-2,3-dimethyl-3,5-dihydro-4H-imidazol-4-one (N1180)**

Previously characterized. Spectral properties correspond to the previously reported.[2]

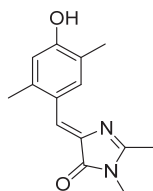

**(Z)-5-(4-Hydroxy-2,5-dimethylbenzylidene)-2,3-dimethyl-3,5-dihydro-4H-imidazol-4-one (M2876)**

Previously characterized. Spectral properties correspond to the previously reported.[2]

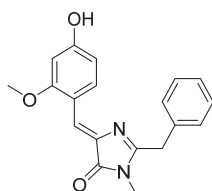

**(Z)-2-Benzyl-5-(4-hydroxy-2-methoxybenzylidene)-3-methyl-3,5-dihydro-4H-imidazol-4-one (N1135)**

Previously characterized. Spectral properties correspond to the previously reported.[7]

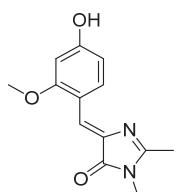

**(Z)-5-(4-Hydroxy-2-methoxybenzylidene)-2,3-dimethyl-3,5-dihydro-4H-imidazol-4-one (N865)**

Previously characterized. Spectral properties correspond to the previously reported.[8]

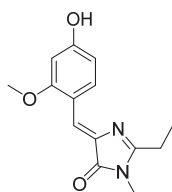

**(Z)-5-(4-Hydroxy-2-methoxybenzylidene)-2-ethyl-3-methyl-3,5-dihydro-4H-imidazol-4-one (ZS362)**

Previously characterized. Spectral properties correspond to the previously reported.[7]

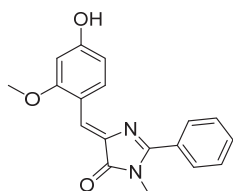

**(Z)-5-(4-hydroxy-2-methoxybenzylidene)-3-methyl-2-phenyl-3,5-dihydro-4H-imidazol-4-one (N1131)**

Orange solid (1.91 g, 62%). M. p. = 262-265 °C.

$^1\text{H}$  NMR (700 MHz, DMSO- $d_6$ )  $\delta$  ppm 10.32 (br. s., 1 H), 8.76 (d,  $J=8.6$  Hz, 1 H), 7.90 (d,  $J=6.9$  Hz, 2 H), 7.57 - 7.63 (m, 3 H), 7.46 (s, 1 H), 6.51 (dd,  $J=8.8, 2.1$  Hz, 1 H), 6.47 (d,  $J=2.1$  Hz, 1 H), 3.86 (s, 3 H), 3.25 (s, 3 H).

$^{13}\text{C}$  NMR (75 MHz, DMSO- $d_6$ )  $\delta$  ppm 170.6, 162.1, 160.8, 160.4, 135.4, 134.1, 131.2, 129.3, 128.8, 128.6, 120.9, 114.1, 108.8, 98.7, 55.7, 28.6.

HRMS (ESI)  $m/z$ : 309.1234 found (calcd for  $\text{C}_{18}\text{H}_{17}\text{N}_2\text{O}_3^+$ ,  $[\text{M}+\text{H}]^+$  309.1234).

**(Z)-2-(4-hydroxy-2-methoxybenzylidene)imidazo[1,2-a]pyridin-3(2H)-ones**

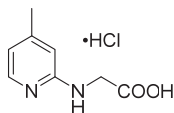

**2-((4-methylpyridin-2-yl)amino)acetic acid hydrochloride**

Synthetic routes and spectral characteristics were previously described.[7]

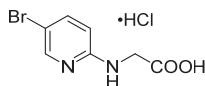

**(5-Bromopyridin-2-yl)glycine hydrochloride**

Synthetic routes and spectral characteristics were previously described.[9]

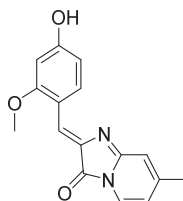

**(Z)-2-(4-Hydroxy-2-methoxybenzylidene)-7-methylimidazo[1,2-a]pyridin-3(2H)-one (M3007a)**

Previously characterized. Spectral properties correspond to the previously reported.[7]

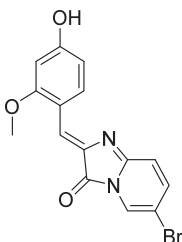

**(Z)-6-Bromo-2-(4-hydroxy-2-methoxybenzylidene)imidazo[1,2-a]pyridin-3(2H)-one (MID323)**

Red solid (0.2 g, 10%). M. p. ~ 285 °C with decomposition.

<sup>1</sup>H NMR (700 MHz, DMSO-*d*<sub>6</sub>) δ ppm 10.52 (br. s., 1 H), 8.79 (d, *J*=8.8 Hz, 1 H), 7.97 (d, *J*=1.0 Hz, 1 H), 7.57 (s, 1 H), 7.32 (dd, *J*=9.8, 1.8 Hz, 1 H), 6.98 (d, *J*=9.7 Hz, 1 H), 6.53 (dd, *J*=8.7, 2.0 Hz, 1 H), 6.47 (d, *J*=2.1 Hz, 1 H), 3.87 (s, 3 H).

<sup>13</sup>C NMR (176 MHz, DMSO-*d*<sub>6</sub>) δ ppm 165.1, 163.0, 161.3, 151.9, 139.3, 134.7, 134.4, 126.0, 122.9, 120.0, 114.7, 109.1, 103.0, 98.7, 55.7.

HRMS (ESI) *m/z*: 347.0032 found (calcd for C<sub>15</sub>H<sub>12</sub>BrN<sub>2</sub>O<sub>3</sub><sup>+</sup>, [M+H]<sup>+</sup> 347.0026).

**5-(Z)-benzylidene-2-(E)-arylvinyl-3-methyl-3,5-dihydro-4H-imidazol-4-ones**

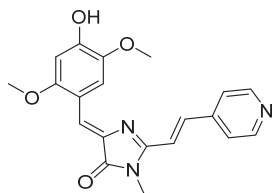

**5-((Z)-4-Hydroxy-2,5-dimethoxybenzylidene)-3-methyl-2-((E)-2-(pyridin-4-yl)vinyl)-3,5-dihydro-4H-imidazol-4-one (N1048)**

Previously characterized. Spectral properties correspond to the previously reported.[2]

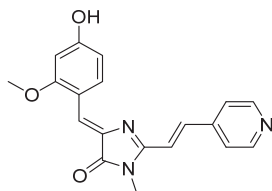

**(Z)-5-(4-Hydroxy-2-methoxybenzylidene)-3-methyl-2-((E)-2(pyridine-4-yl)vinyl)-3,5-dihydro-4H-imidazol-4-one (N871b)**

Previously characterized. Spectral properties correspond to the previously reported.[8]

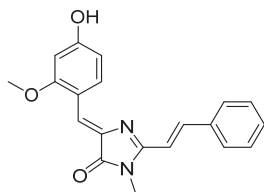

**(Z)-5-(4-Hydroxy-2-methoxybenzylidene)-3-methyl-2-((E)-styryl)-3,5-dihydro-4H-imidazol-4-one (MID145)**

Previously characterized. Spectral properties correspond to the previously reported.[7]

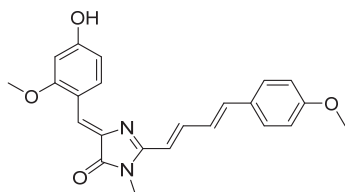

**(Z)-5-(4-Hydroxy-2-methoxybenzylidene)-2-((1E,3E)-4-(4-methoxyphenyl)buta-1,3-dien-1-yl)-3-methyl-3,5-dihydro-4H-imidazol-4-one (N1052)**

Previously characterized. Spectral properties correspond to the previously reported.[7]

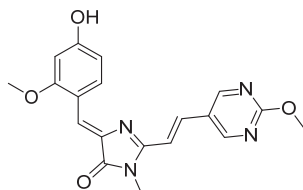

**5-((Z)-4-Hydroxy-2-methoxybenzylidene)-2-((E)-2-(2-methoxypyrimidin-5-yl)vinyl)-3-methyl-3,5-dihydro-4H-imidazol-4-one (N1184)**

Previously characterized. Spectral properties correspond to the previously reported.[7]

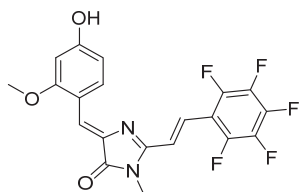

**5-((Z)-4-Hydroxy-2-methoxybenzylidene)-3-methyl-2-((E)-2-(perfluorophenyl)vinyl)-3,5-dihydro-4H-imidazol-4-one (N1049)**

Previously characterized. Spectral properties correspond to the previously reported.[7]

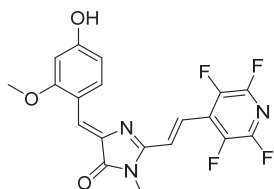

**5-((Z)-4-Hydroxy-2-methoxybenzylidene)-3-methyl-2-((E)-2-(perfluoropyridin-4-yl)vinyl)-3,5-dihydro-4H-imidazol-4-one (N967)**

Previously characterized. Spectral properties correspond to the previously reported.[7]

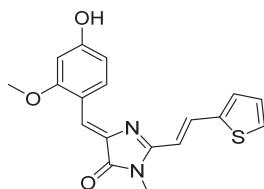

**5-((Z)-4-Hydroxy-2-methoxybenzylidene)-3-methyl-2-((E)-2-(thiophen-2-yl)vinyl)-3,5-dihydro-4H-imidazol-4-one (N1039)**

Previously characterized. Spectral properties correspond to the previously reported.[7]

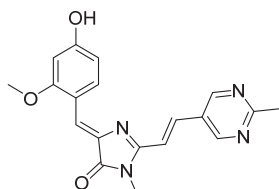

**5-((Z)-4-Hydroxy-2-methoxybenzylidene)-3-methyl-2-((E)-2-(2-methylpyrimidin-5-yl)vinyl)-3,5-dihydro-4H-imidazol-4-one (N1202)**

Previously characterized. Spectral properties correspond to the previously reported.[7]

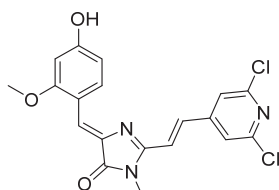

**5-((Z)-4-Hydroxy-2-methoxybenzylidene)-2-((E)-2-(2,6-dichloropyridin-4-yl)vinyl)-3-methyl-3,5-dihydro-4H-imidazol-4-one (N960b)**

Previously characterized. Spectral properties correspond to the previously reported.[7]

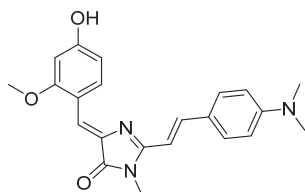

**5-((Z)-4-Hydroxy-2-methoxybenzylidene)-3-methyl-2-((E)-4-(dimethylamino)styryl)-3,5-dihydro-4H-imidazol-4-one (MID147)**

Previously characterized. Spectral properties correspond to the previously reported.[7]

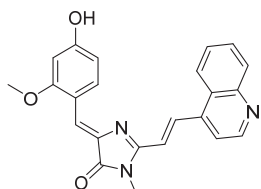

**5-((Z)-4-Hydroxy-2-methoxybenzylidene)-3-methyl-2-((E)-2-(quinolin-4-yl)vinyl)-3,5-dihydro-4H-imidazol-4-one (ZS331)**

Previously characterized. Spectral properties correspond to the previously reported.[7]

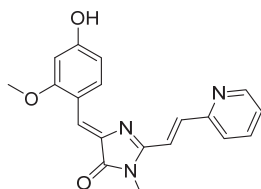

**5-((Z)-4-Hydroxy-2-methoxybenzylidene)-3-methyl-2-((E)-2-(pyridin-2-yl)vinyl)-3,5-dihydro-4H-imidazol-4-one (M2766)**

Previously characterized. Spectral properties correspond to the previously reported.[7]

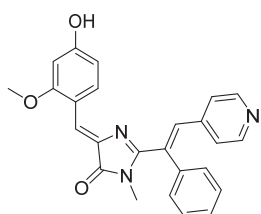

**5-((Z)-4-Hydroxy-2-methoxybenzylidene)-3-methyl-2-((E)-1-phenyl-2-(pyridin-4-yl)vinyl)-3,5-dihydro-4H-imidazol-4-one (N1142)**

Previously characterized. Spectral properties correspond to the previously reported.[7]

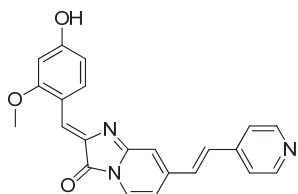

**(Z)-2-(4-Hydroxy-2-methoxybenzylidene)-7-((E)-2-(pyridin-4-yl)vinyl)imidazo[1,2-a]pyridin-3(2H)-one (MID343)**

Previously characterized. Spectral properties correspond to the previously reported.[7]

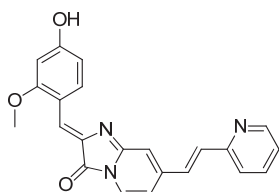

**(Z)-2-(4-Hydroxy-2-methoxybenzylidene)-7-((E)-2-(pyridin-2-yl)vinyl)imidazo[1,2-a]pyridin-3(2H)-one (MID367)**

Previously characterized. Spectral properties correspond to the previously reported.[7]

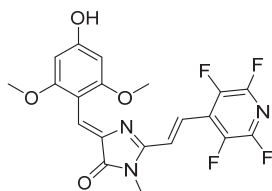

**5-((Z)-4-Hydroxy-2,6-dimethoxybenzylidene)-3-methyl-2-((E)-2-(perfluoropyridin-4-yl)vinyl)-3,5-dihydro-4H-imidazol-4-one (N971)**

Previously characterized. Spectral properties correspond to the previously reported.[2]

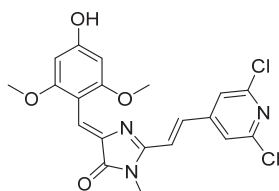

**5-((Z)-4-Hydroxy-2,6-dimethoxybenzylidene)-2-((E)-2-(2,6-dichloropyridin-4-yl)vinyl)-3-methyl-3,5-dihydro-4H-imidazol-4-one (N973)**

Previously characterized. Spectral properties correspond to the previously reported.[2]



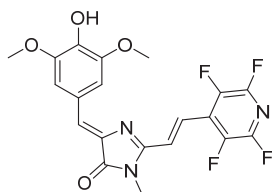

**5-((Z)-4-Hydroxy-3,5-dimethoxybenzylidene)-2-((E)-2-(perfluoropyridin-4-yl)vinyl)-3-methyl-3,5-dihydro-4H-imidazol-4-one (N980)**

Previously characterized. Spectral properties correspond to the previously reported.[2]

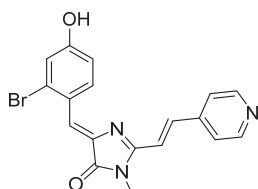

**5-((Z)-2-Bromo-4-hydroxybenzylidene)-3-methyl-2-((E)-2-(pyridine-4-yl)vinyl)-3,5-dihydro-4H-imidazol-4-one (N1205)**

Previously characterized. Spectral properties correspond to the previously reported.[2]

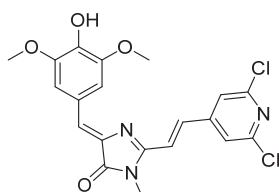

**5-((Z)-4-Hydroxy-3,5-dimethoxybenzylidene)-2-((E)-2-(2,6-dichloropyridin-4-yl)vinyl)-3-methyl-3,5-dihydro-4H-imidazol-4-one (N960a)**

Previously characterized. Spectral properties correspond to the previously reported.[2]

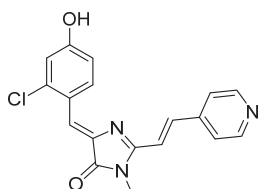

**5-((Z)-2-Chloro-4-hydroxybenzylidene)-3-methyl-2-((E)-2-(pyridine-4-yl)vinyl)-3,5-dihydro-4H-imidazol-4-one (N1204)**

Previously characterized. Spectral properties correspond to the previously reported.[2]

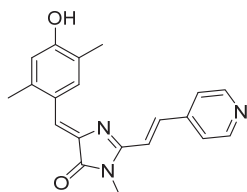

**5-((Z)-4-Hydroxy-2,5-dimethylbenzylidene)-3-methyl-2-((E)-2-(pyridine-4-yl)vinyl)-3,5-dihydro-4H-imidazol-4-one (N1206)**

Previously characterized. Spectral properties correspond to the previously reported.[2]

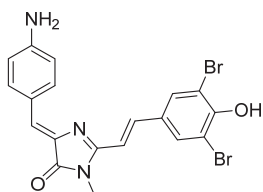

**5-((Z)-4-Aminobenzylidene)-2-((E)-3,5-dibromo-4-hydroxystyryl)-3-methyl-3,5-dihydro-4H-imidazol-4-one (ZS309)**

Previously characterized. Spectral properties correspond to the previously reported.[2]

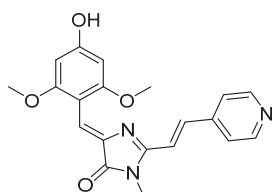

**5-((Z)-4-Hydroxy-2,6-dimethoxybenzylidene)-3-methyl-2-((E)-2-(pyridin-4-yl)vinyl)-3,5-dihydro-4H-imidazol-4-one (ZS316)**

Previously characterized. Spectral properties correspond to the previously reported.[2]

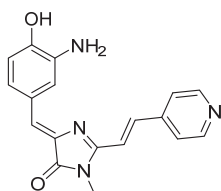

**5-((Z)-3-Amino-4-hydroxybenzylidene)-3-methyl-2-((E)-2-(pyridin-4-yl)vinyl)-3,5-dihydro-4H-imidazol-4-one (ZS325)**

Previously characterized. Spectral properties correspond to the previously reported.[2]

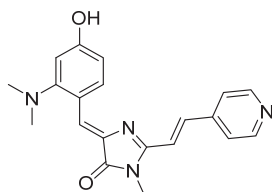

**5-((Z)-2-(Dimethylamino)-4-hydroxybenzylidene)-3-methyl-2-((E)-2-(pyridin-4-yl)vinyl)-3,5-dihydro-4H-imidazol-4-one (MID213)**

Previously characterized. Spectral properties correspond to the previously reported.[2]

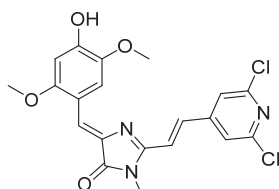

**5-((Z)-4-Hydroxy-2,5-dimethoxybenzylidene)-3-methyl-2-((E)-2-(2,6-dichloropyridin-4-yl)vinyl)-3,5-dihydro-4H-imidazol-4-one (M2767)**

Previously characterized. Spectral properties correspond to the previously reported.[2]

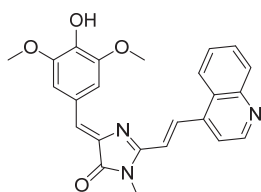

**5-((Z)-4-Hydroxy-3,5-dimethoxybenzylidene)-3-methyl-2-((E)-2-(quinolin-4-yl)vinyl)-3,5-dihydro-4H-imidazol-4-one (N1196)**

Previously characterized. Spectral properties correspond to the previously reported.[10]

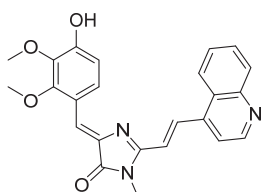

**5-((Z)-4-Hydroxy-2,3-dimethoxybenzylidene)-3-methyl-2-((E)-2-(quinolin-4-yl)vinyl)-3,5-dihydro-4H-imidazol-4-one (N1197)**

Previously characterized. Spectral properties correspond to the previously reported.[10]

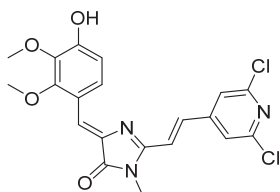

**2-((*E*)-2-(2,6-dichloropyridin-4-yl)vinyl)-5-((*Z*)-4-hydroxy-2,3-dimethoxybenzylidene)-3-methyl-3,5-dihydro-4*H*-imidazol-4-one (N1198)**

Previously characterized. Spectral properties correspond to the previously reported.[10]

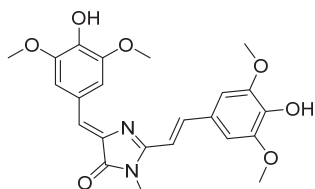

**5-((*Z*)-4-hydroxy-3,5-dimethoxybenzylidene)-2-((*E*)-4-hydroxy-3,5-dimethoxystyryl)-3-methyl-3,5-dihydro-4*H*-imidazol-4-one (N1193)**

Previously characterized. Spectral properties correspond to the previously reported.[10]

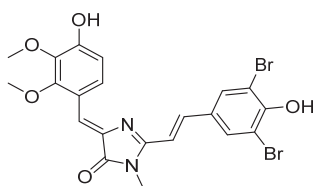

**2-((*E*)-3,5-dibromo-4-hydroxystyryl)-5-((*Z*)-4-hydroxy-2,3-dimethoxybenzylidene)-3-methyl-3,5-dihydro-4*H*-imidazol-4-one (N1199)**

Previously characterized. Spectral properties correspond to the previously reported.[10]

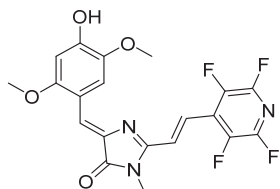

**5-((*Z*)-4-Hydroxy-2,5-dimethoxybenzylidene)-3-methyl-2-((*E*)-2-(perfluoropyridin-4-yl)vinyl)-3,5-dihydro-4*H*-imidazol-4-one (N1056)**

Previously characterized. Spectral properties correspond to the previously reported.[2]

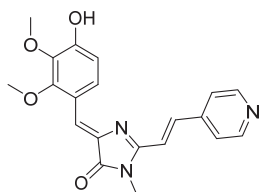

**5-((Z)-4-Hydroxy-2,3-dimethoxybenzylidene)-3-methyl-2-((E)-2-(pyridin-4-yl)vinyl)-3,5-dihydro-4H-imidazol-4-one (N1068)**

Previously characterized. Spectral properties correspond to the previously reported.[2]

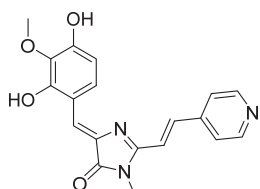

**5-((Z)-2,4-Dihydroxy-3-methoxybenzylidene)-3-methyl-2-((E)-2-(pyridin-4-yl)vinyl)-3,5-dihydro-4H-imidazol-4-one (N1069)**

Previously characterized. Spectral properties correspond to the previously reported.[2]

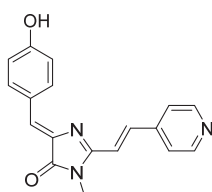

**5-((Z)-4-Hydroxybenzylidene)-3-methyl-2-((E)-2-(pyridin-4-yl)vinyl)-3,5-dihydro-4H-imidazol-4-one (A9)**

Previously characterized. Spectral properties correspond to the previously reported.[8]

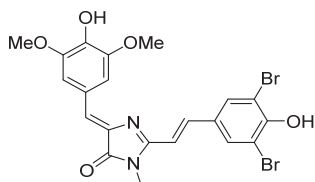

**2-((E)-3,5-dibromo-4-hydroxystyryl)-5-((Z)-4-hydroxy-3,5-dimethoxybenzylidene)-3-methyl-3,5-dihydro-4H-imidazol-4-one (Z260)**

Previously characterized. Spectral properties correspond to the previously reported.[8]

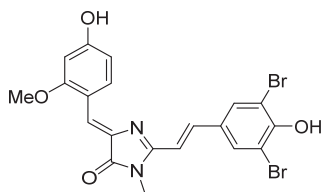

**2-((E)-3,5-dibromo-4-hydroxystyryl)-5-((Z)-4-hydroxy-2-methoxybenzylidene)-3-methyl-3,5-dihydro-4H-imidazol-4-one (N871a)**

Previously characterized. Spectral properties correspond to the previously reported.[8]

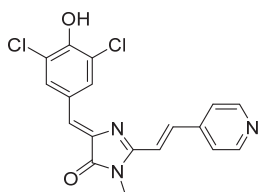

**5-((Z)-3,5-dichloro-4-hydroxybenzylidene)-3-methyl-2-((E)-2-(pyridin-4-yl)vinyl)-3,5-dihydro-4H-imidazol-4-one (N901)**

Previously characterized. Spectral properties correspond to the previously reported.[8]

### Other compounds

Several compounds were prepared in accordance with previously reported procedures (see references below) or were taken from stock of our laboratory.

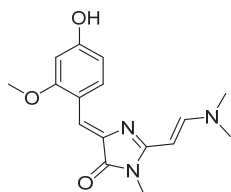

**5-((Z)-4-Hydroxy-2-methoxybenzylidene)-3-methyl-2-((E)-2-(dimethylamino)vinyl)-3,5-dihydro-4H-imidazol-4-one (N1122)**

Synthetic routes and spectral characteristics were previously described.[7]

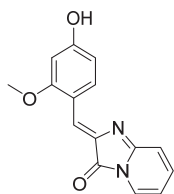

**(Z)-2-(4-Hydroxy-2-methoxybenzylidene)imidazo[1,2-a]pyridin-3(2H)-one (N1123)**

Synthetic routes and spectral characteristics were previously described.[7]

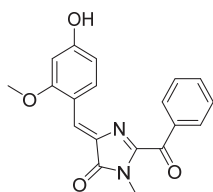

**(Z)-2-Benzoyl-5-(4-hydroxy-2-methoxybenzylidene)-3-methyl-3,5-dihydro-4H-imidazol-4-one (N1139)**

Synthetic routes and spectral characteristics were previously described.[7]

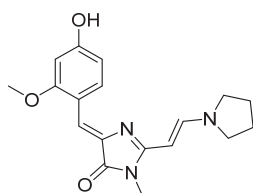

**5-((Z)-4-Hydroxy-2-methoxybenzylidene)-3-methyl-2-((E)-2-(pyrrolidin-1-yl)vinyl)-3,5-dihydro-4H-imidazol-4-one (N1118)**

Synthetic routes and spectral characteristics were previously described.[7]

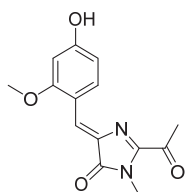

**(Z)-2-Acetyl-5-(4-hydroxy-2-methoxybenzylidene)-3-methyl-3,5-dihydro-4H-imidazol-4-one (N1124)**

Synthetic routes and spectral characteristics were previously described.[7]

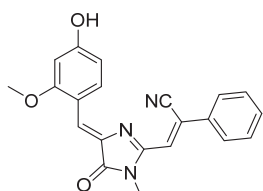

**(Z)-3-(4-((Z)-4-Hydroxy-2-methoxybenzylidene)-1-methyl-5-oxo-4,5-dihydro-1H-imidazol-2-yl)-2-phenylacrylonitrile (MID151)**

Synthetic routes and spectral characteristics were previously described.[7]

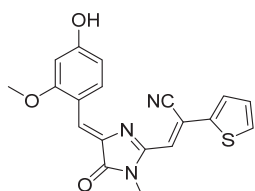

**(Z)-3-(4-((Z)-4-Hydroxy-2-methoxybenzylidene)-1-methyl-5-oxo-4,5-dihydro-1H-imidazol-2-yl)-2-(thiophen-2-yl)acrylonitrile (MID153)**

Synthetic routes and spectral characteristics were previously described.[7]

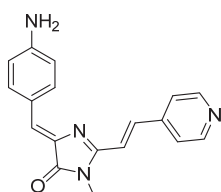

**5-((Z)-4-Aminobenzylidene)-3-methyl-2-((E)-2-(pyridin-4-yl)vinyl)-3,5-dihydro-4H-imidazol-4-one (ZS319)**

Synthetic routes and spectral characteristics were previously described.[2]



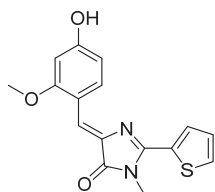

**(Z)-5-(4-Hydroxy-2-methoxybenzylidene)-3-methyl-2-(thiophene-2-yl)-3,5-dihydro-4H-imidazol-4-one (SH16)**

Synthetic routes and spectral characteristics were previously described.[11]

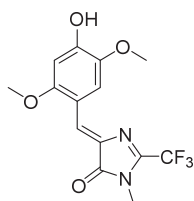

**(Z)-5-(4-Hydroxy-2,5-dimethoxybenzylidene)-3-methyl-2-(trifluoromethyl)-3,5-dihydro-4H-imidazol-4-one (M2738d)**

Synthetic routes and spectral characteristics were previously described.[12]

## 8. References

1. Würth C., Grabolle M., Pauli J., Spieles M., Resch-Genger U. Relative and Absolute Determination of Fluorescence Quantum Yields of Transparent Samples. *Nature Protocols*. **2013**, 8(8), 1535.
2. Mineev K.S., Goncharuk S.A., Goncharuk M.V., Povarova N.V., Sokolov A.I., Baleeva N.S., Smirnov A.Y., Myasnyanko I.N., Ruchkin D.A., Bukhdruker S., Remeeva A., Mishin A., Borshchevskiy V., Gordeliy V., Arseniev A.S., Gorbachev D.A., Gavrikov A.S., Mishin A.S., Baranov M.S. NanoFAST: Structure-Based Design of a Small Fluorogen-Activating Protein with Only 98 Amino Acids. *Chem. Sci.* **2021**, 12(19), 6719.
3. Plamont M. A., Billon-Denis R., Maurin S., Gauron C., Pimenta F. M., Specht C. G., Shi J., Qurard J., Pan B., Rossignol J., Moncoq K., Morellet N., Volovitch M., Lescop E., Chen Y., Triller A., Vríz S., Saux T., Jullien L., Gautier A. Small Fluorescence-Activating and Absorption-Shifting Tag for Tunable Protein Imaging In Vivo. *Proc. Natl. Acad. Sci. USA* **2016**, 113, 497.
4. Li C., Plamont M. A., Sladitschek H. L., Rodrigues V., Aujard I., Neveu P., Saux T., Jullien L., Gautier, A. Dynamic multicolor protein labeling in living cells. *Chem. Sci.* **2017**, 8, 5598.
5. Wang, Z., Liu, Z., Lee, W., Kim, S-N., Yoon, G., Cheon, S.H. Design, synthesis and docking study of 5-(substituted benzylidene)thiazolidine-2,4-dione derivatives as inhibitors of protein tyrosine phosphatase 1B. *Bioorg. Med. Chem. Lett.* **2014**, 24 (15), 3337.
6. Baldrige A., Kowalik J., Tolbert L. M. Efficient Synthesis of New 4-Arylideneimidazolin-5-Ones Related to the GFP Chromophore by 2+3 Cyclocondensation of Arylideneimines with Imidate Ylides. *Synthesis*. **2010**, 14, 2424.
7. Myasnyanko I.N., Gavrikov A.S., Zaitseva S.O., Smirnov A.Y., Zaitseva E.R., Sokolov A.I., Malyshevskaya K.K., Baleeva N.S., Mishin A.S., Baranov M.S. Study of the Position of the Conjugated Substitute Influence on the Optical Properties of the Kaede Protein Chromophore Derivatives. *Chem. Eur. J.* **2021**, 27, 3986
8. Povarova N.V., Zaitseva S.O., Baleeva N.S., Smirnov A.Yu., Myasnyanko I.N., Zagudaylova M.B., Bozhanova N.G., Gorbachev D.A., Malyshevskaya K.K., Gavrikov A.S., Mishin A.S., Baranov M.S. Red-Shifted Substrates for FAST Fluorogen-Activating Protein Based on the GFP-Like Chromophores. *Chem. Eur. J.* **2019**, 25 (41), 9592.
9. Myasnyanko I.N., Baleeva N.S., Baranov M.S. Study of the Position of the Conjugated Substitute Influence on the Optical Properties of the Kaede Protein Chromophore Derivatives. *Russ. J. Bioorg. Chem.*, **2022**, 48, 110.
10. Ryazantsev D.Y., Myshkin M.Y., Alferova V.A., Tsvetkov V.B., Shustova E.Y., Kamzeeva P.N., Kovalets P.V., Zaitseva E.R., Baleeva N.S., Zatsepin T.S., Shenkarev Z.O., Baranov M.S., Kozlovskaya L.I., Aralov A.V. Probing GFP Chromophore Analogs as Anti-HIV Agents Targeting LTR-III G-Quadruplex. *Biomolecules*. **2021**, 11 (10), 1409.
11. Baleeva N.S., Smirnov A.Y., Myasnyanko I.N., Gavrikov A.S., Baranov M.S. Thiophene Analog of the GFP Chromophore As Fluorogen for FAST Protein. *Russ. J. Bioorg. Chem.* **2021**, 47(5), 1118.
12. Chen C., Tachibana S.R., Baleeva N.S., Myasnyanko I.N., Bogdanov A.M., Gavrikov A.S., Mishin A.S., Malyshevskaya K.K., Baranov M.S., Fang C. Developing Bright Green Fluorescent Protein (GFP)-like Fluorogens for Live-Cell Imaging with Nonpolar Protein-Chromophore Interactions. *Chemistry A European Journal*. **2021**, 27(35), 8946.

## 9. Copies of $^1\text{H}$ and $^{13}\text{C}$ NMR spectra

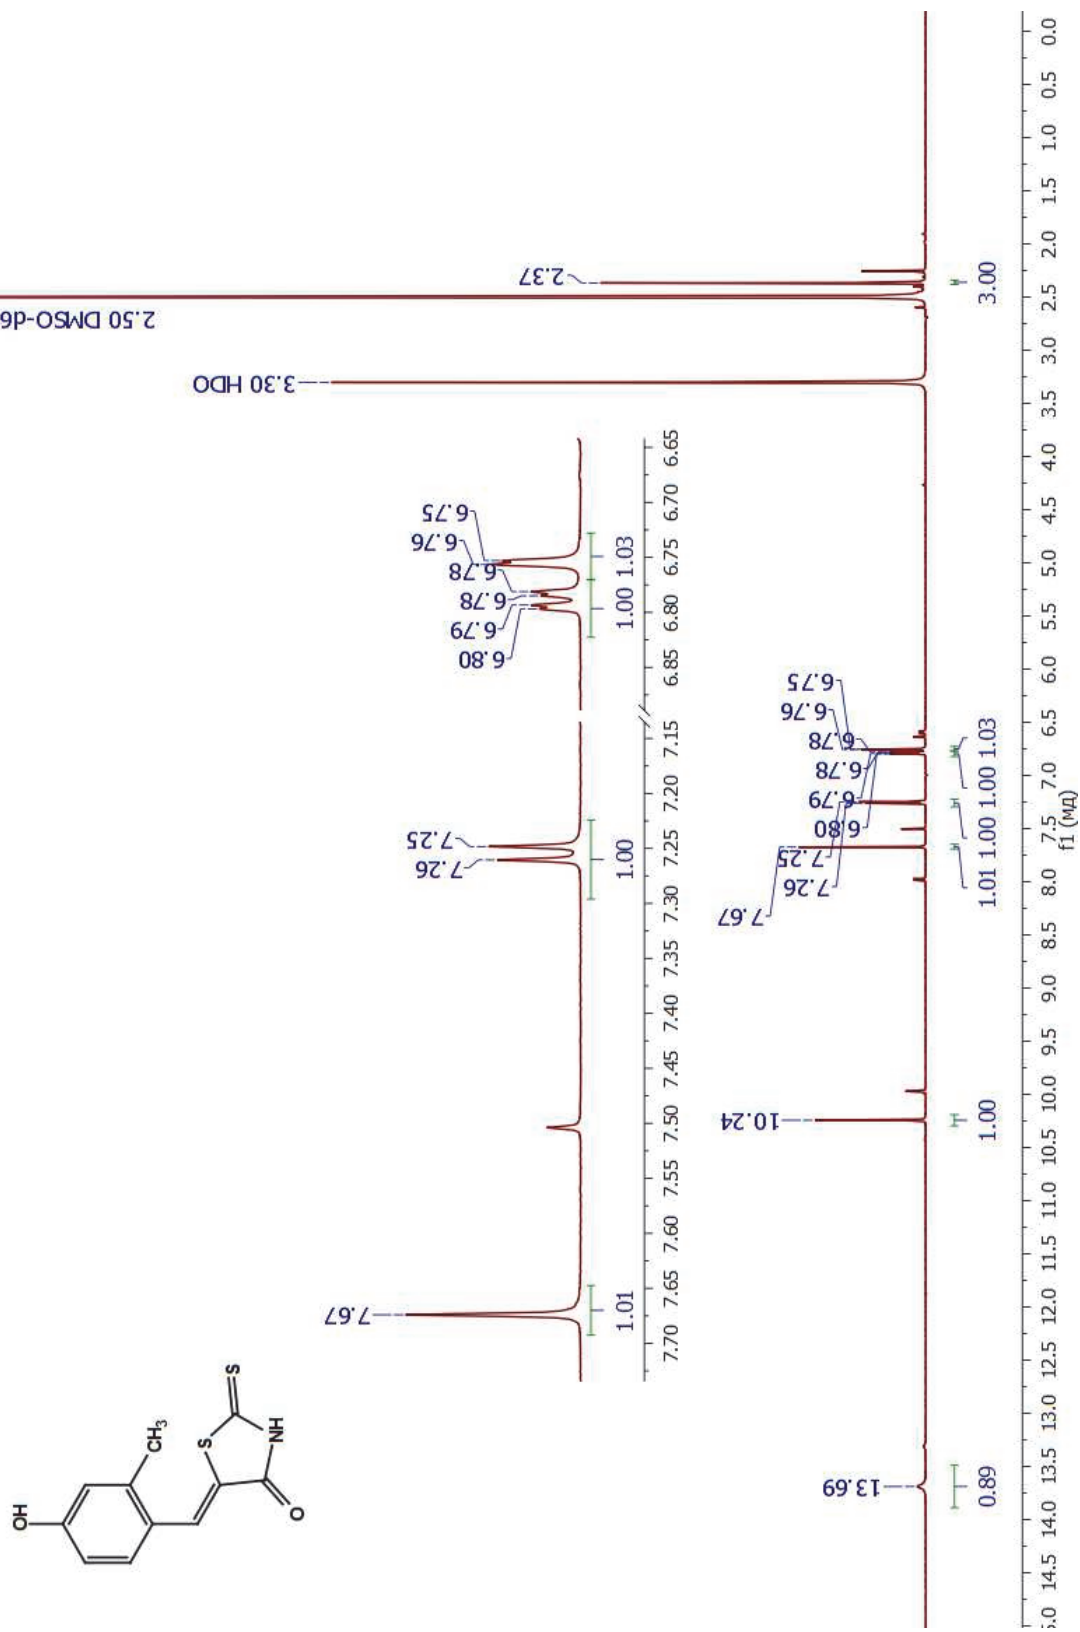

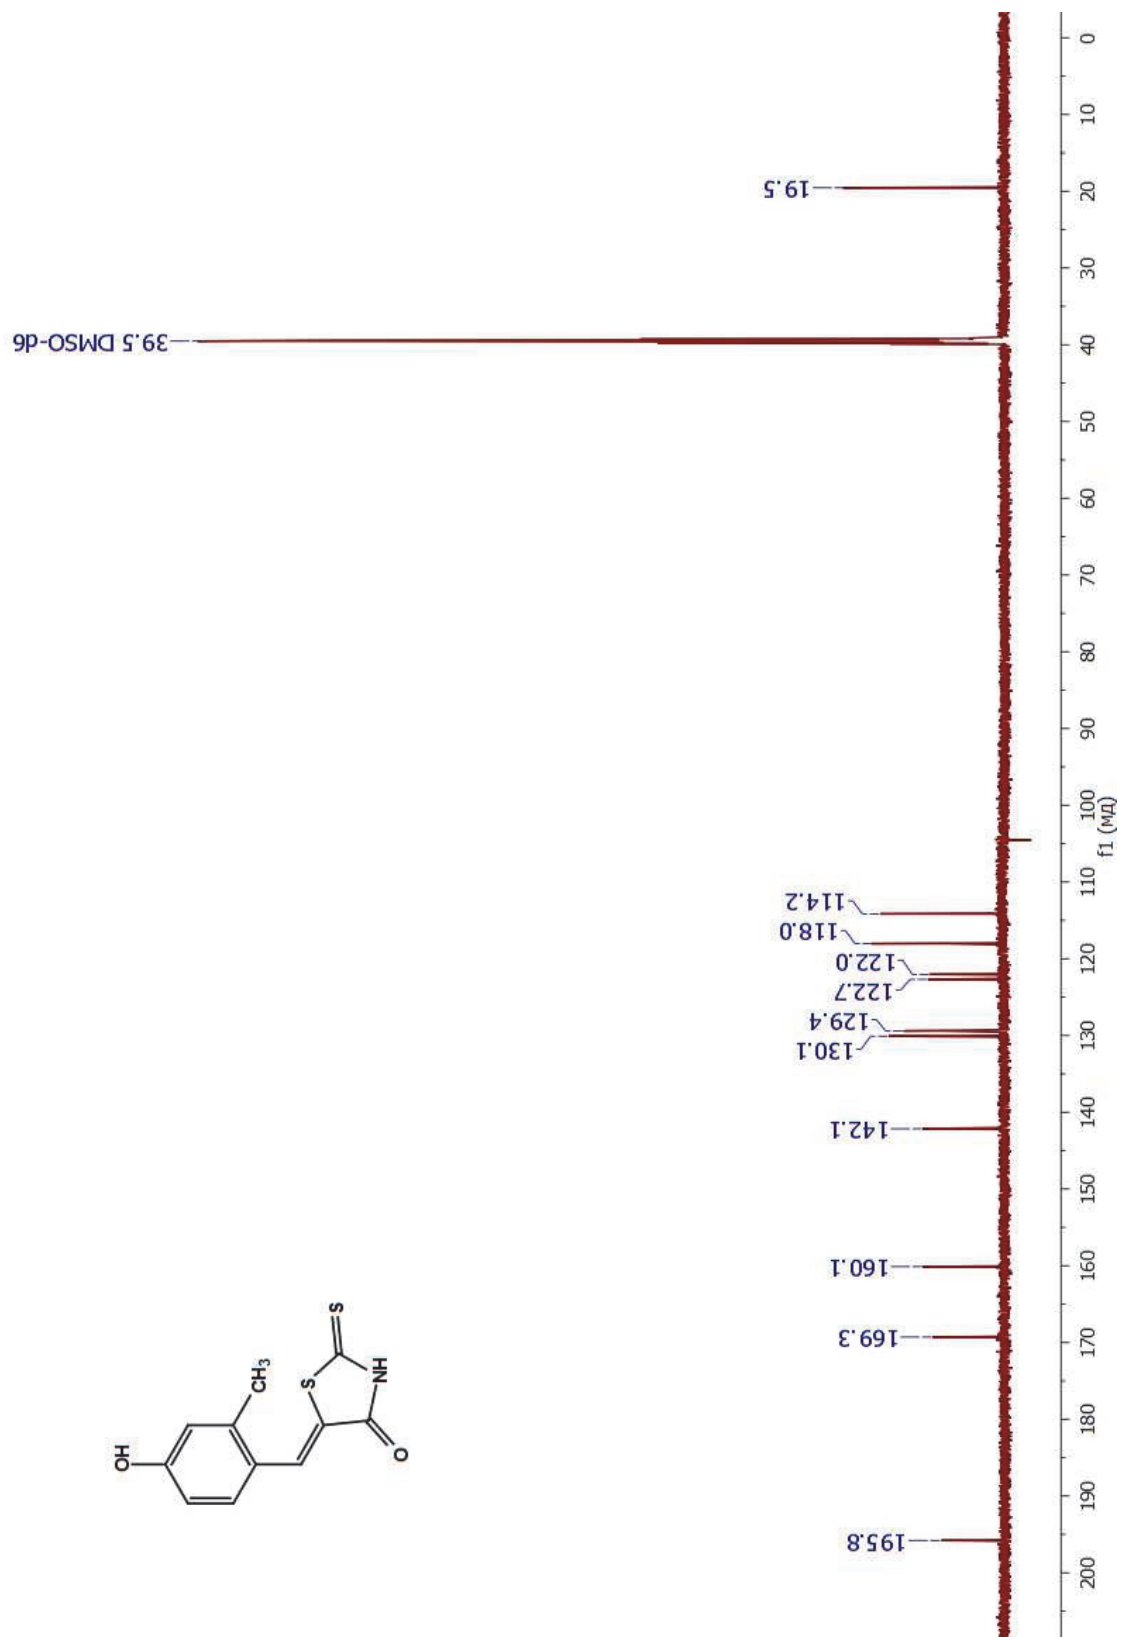

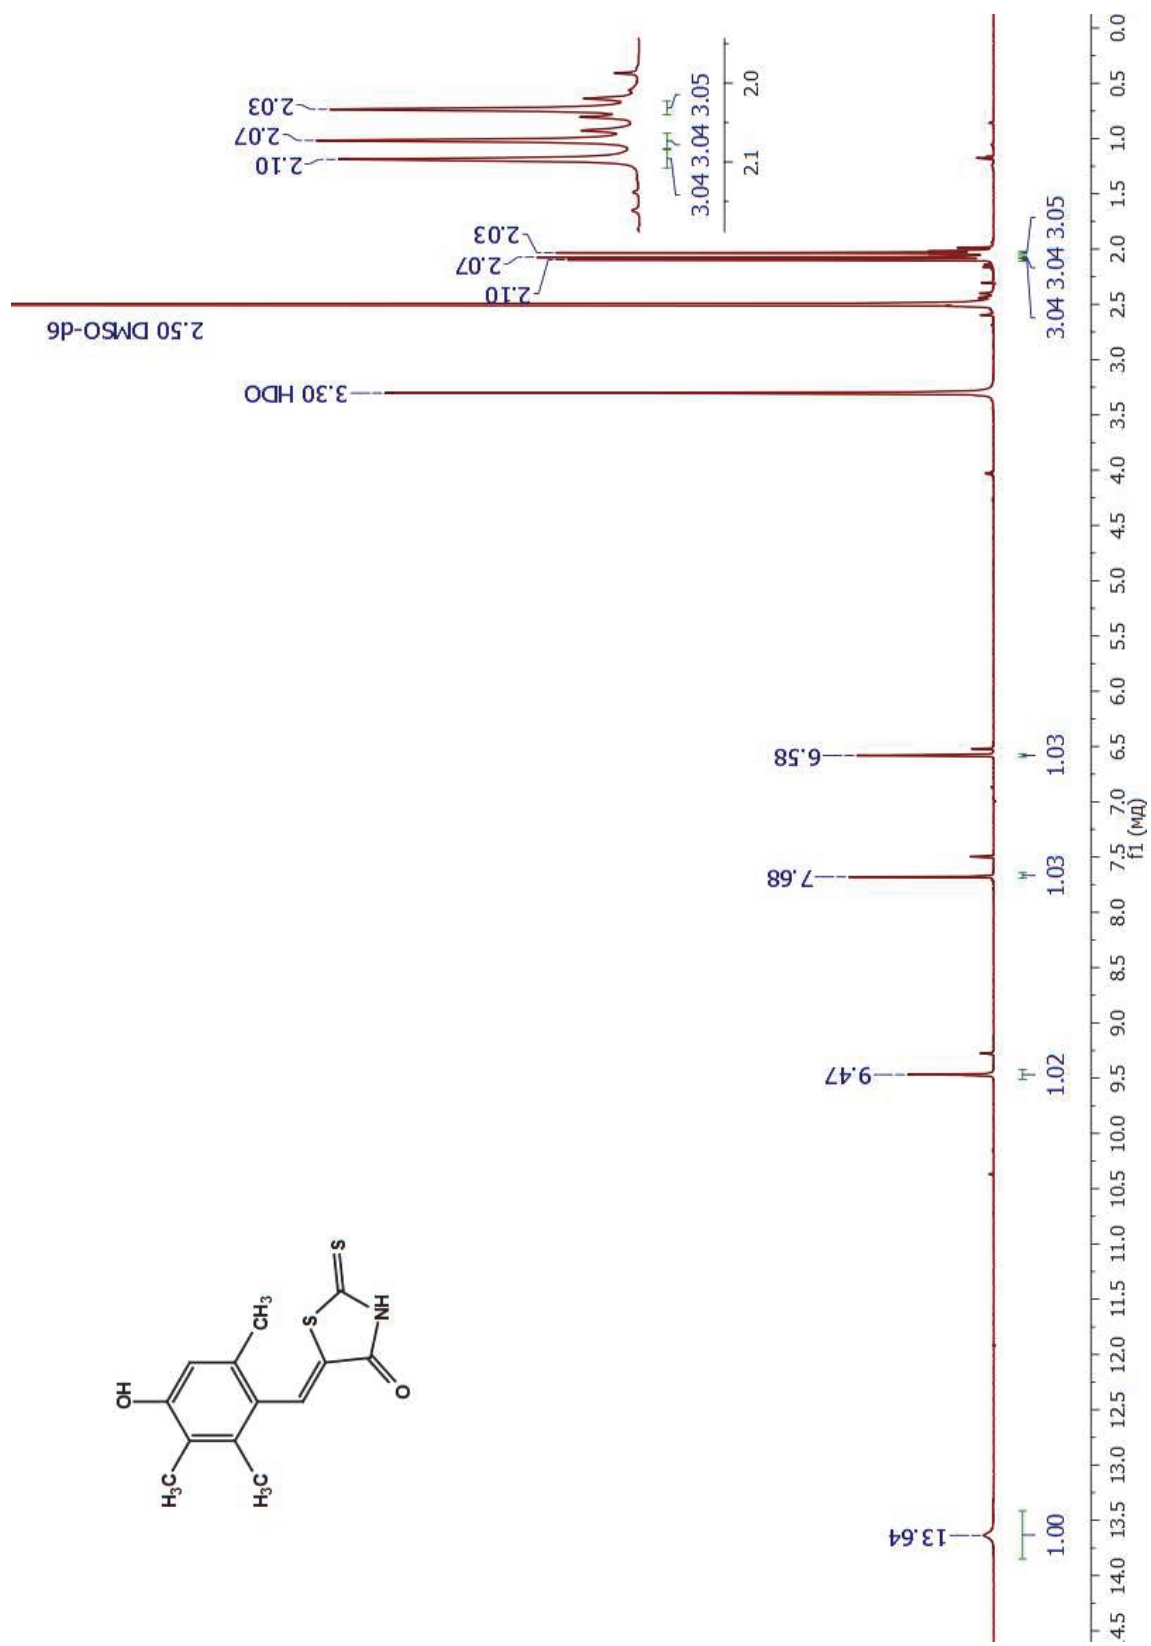

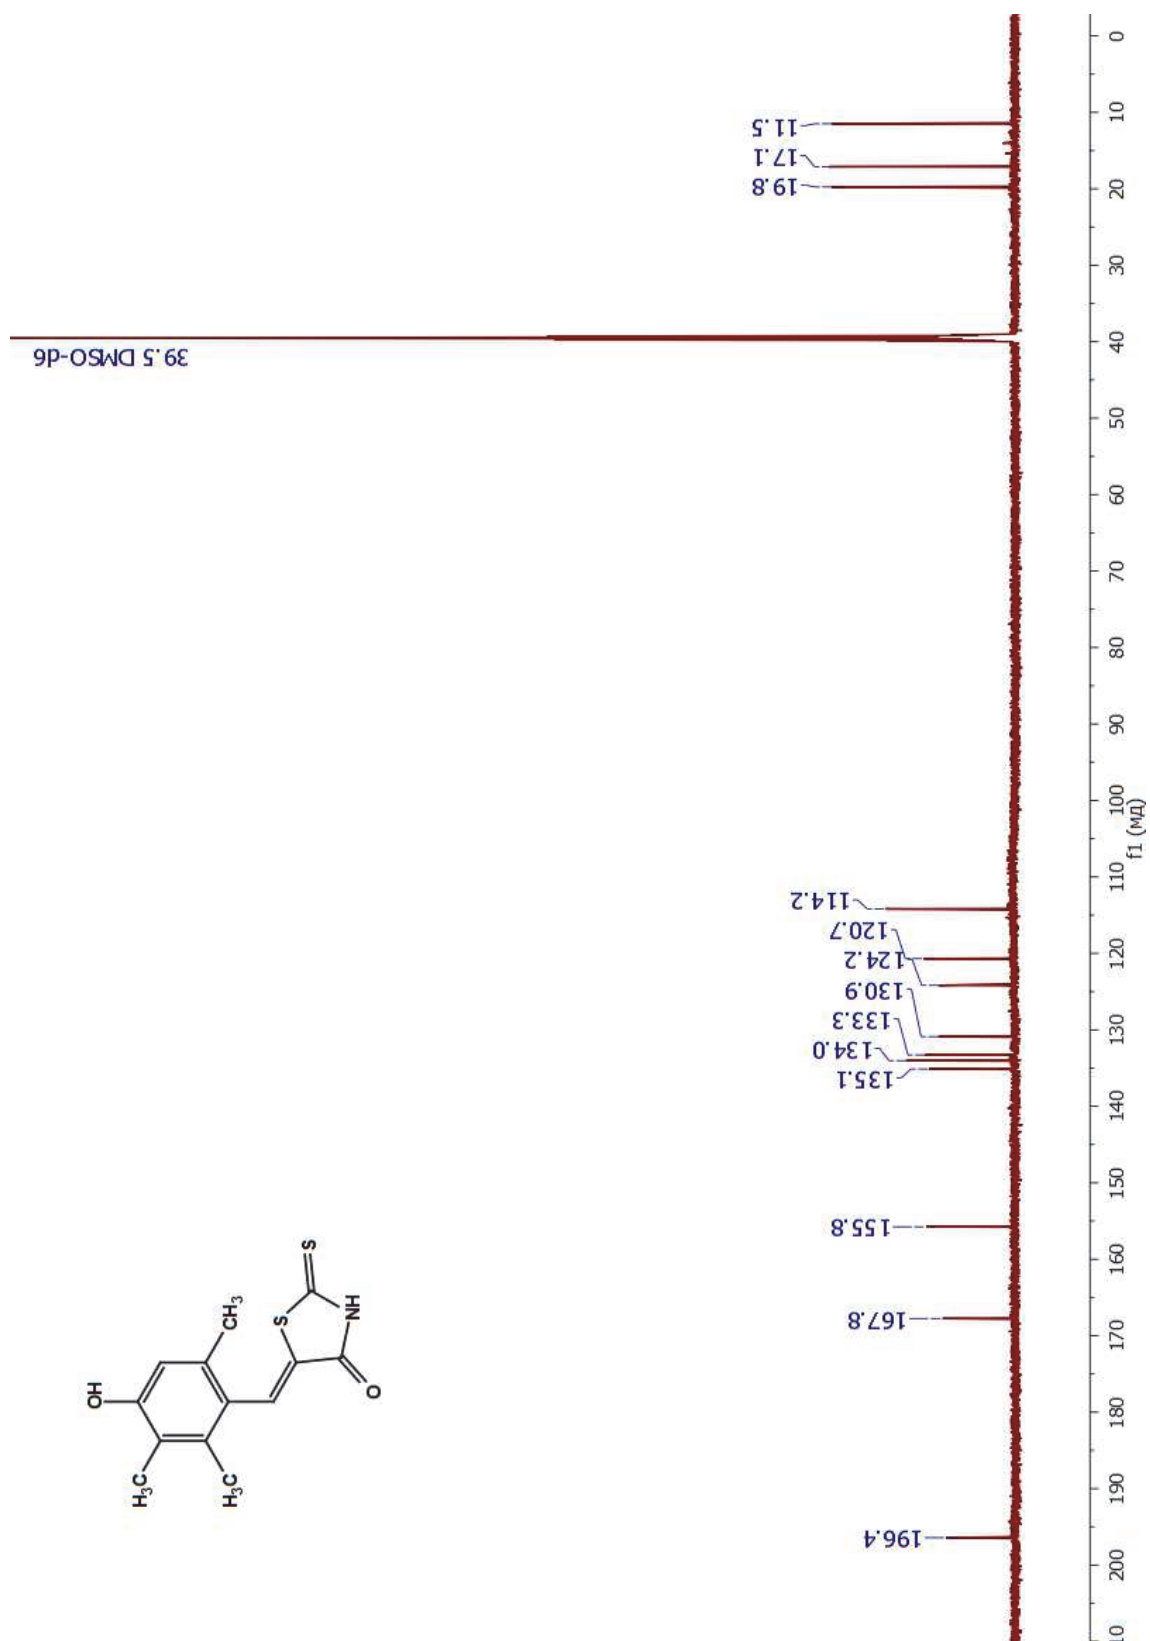

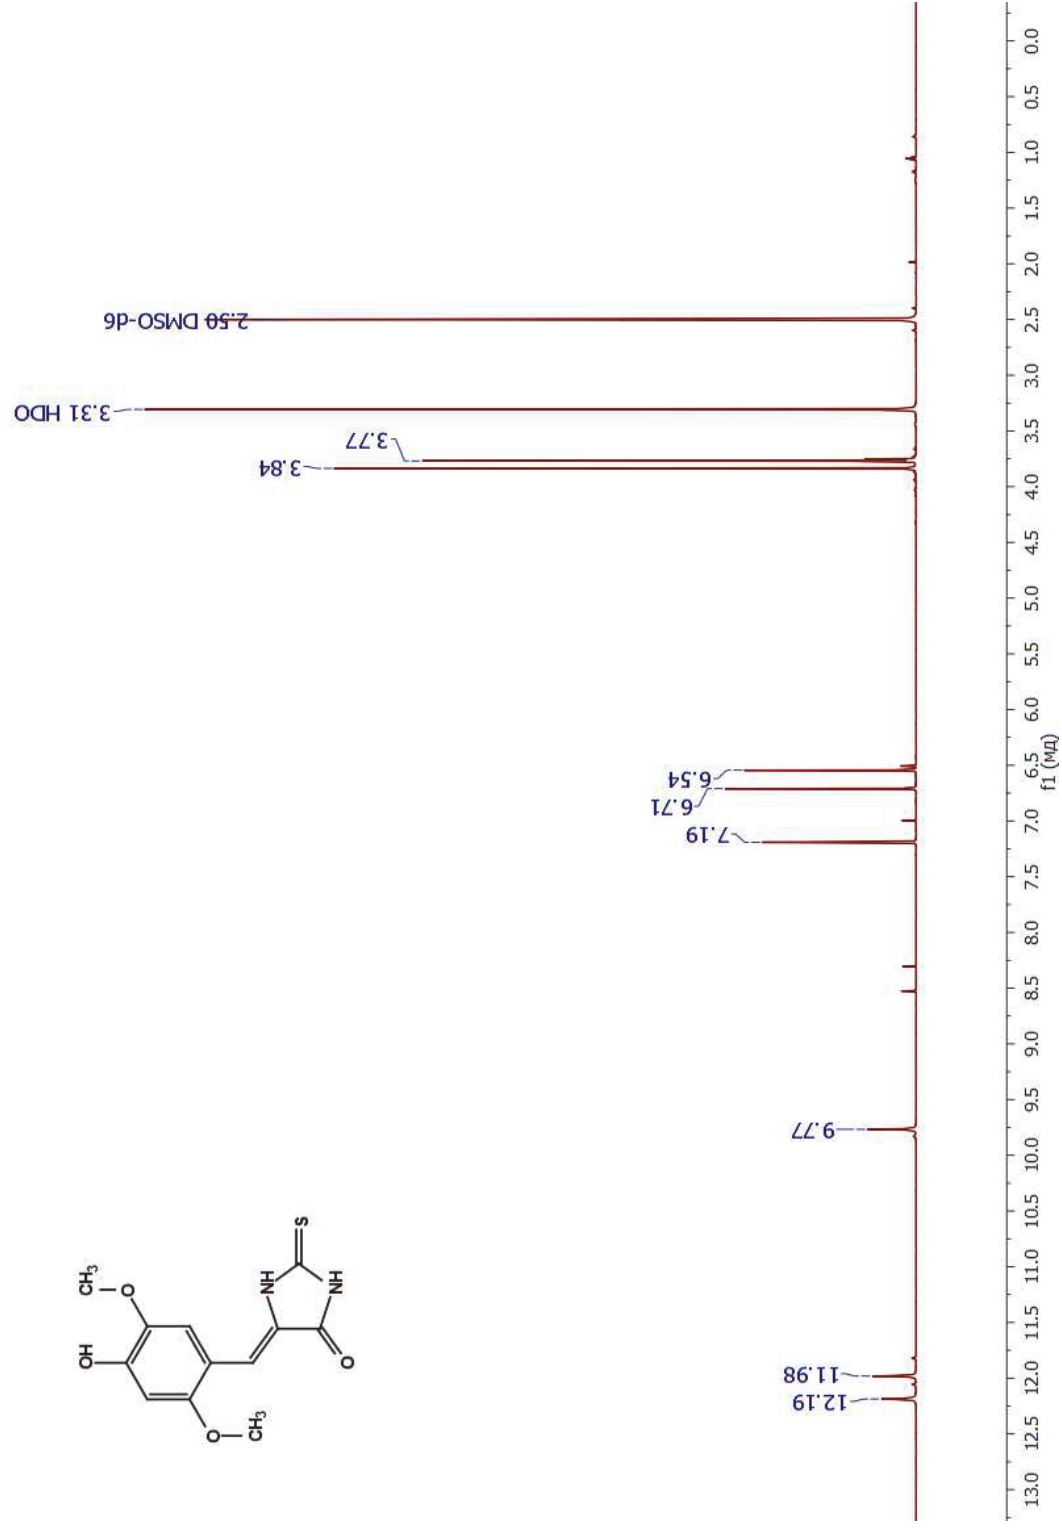

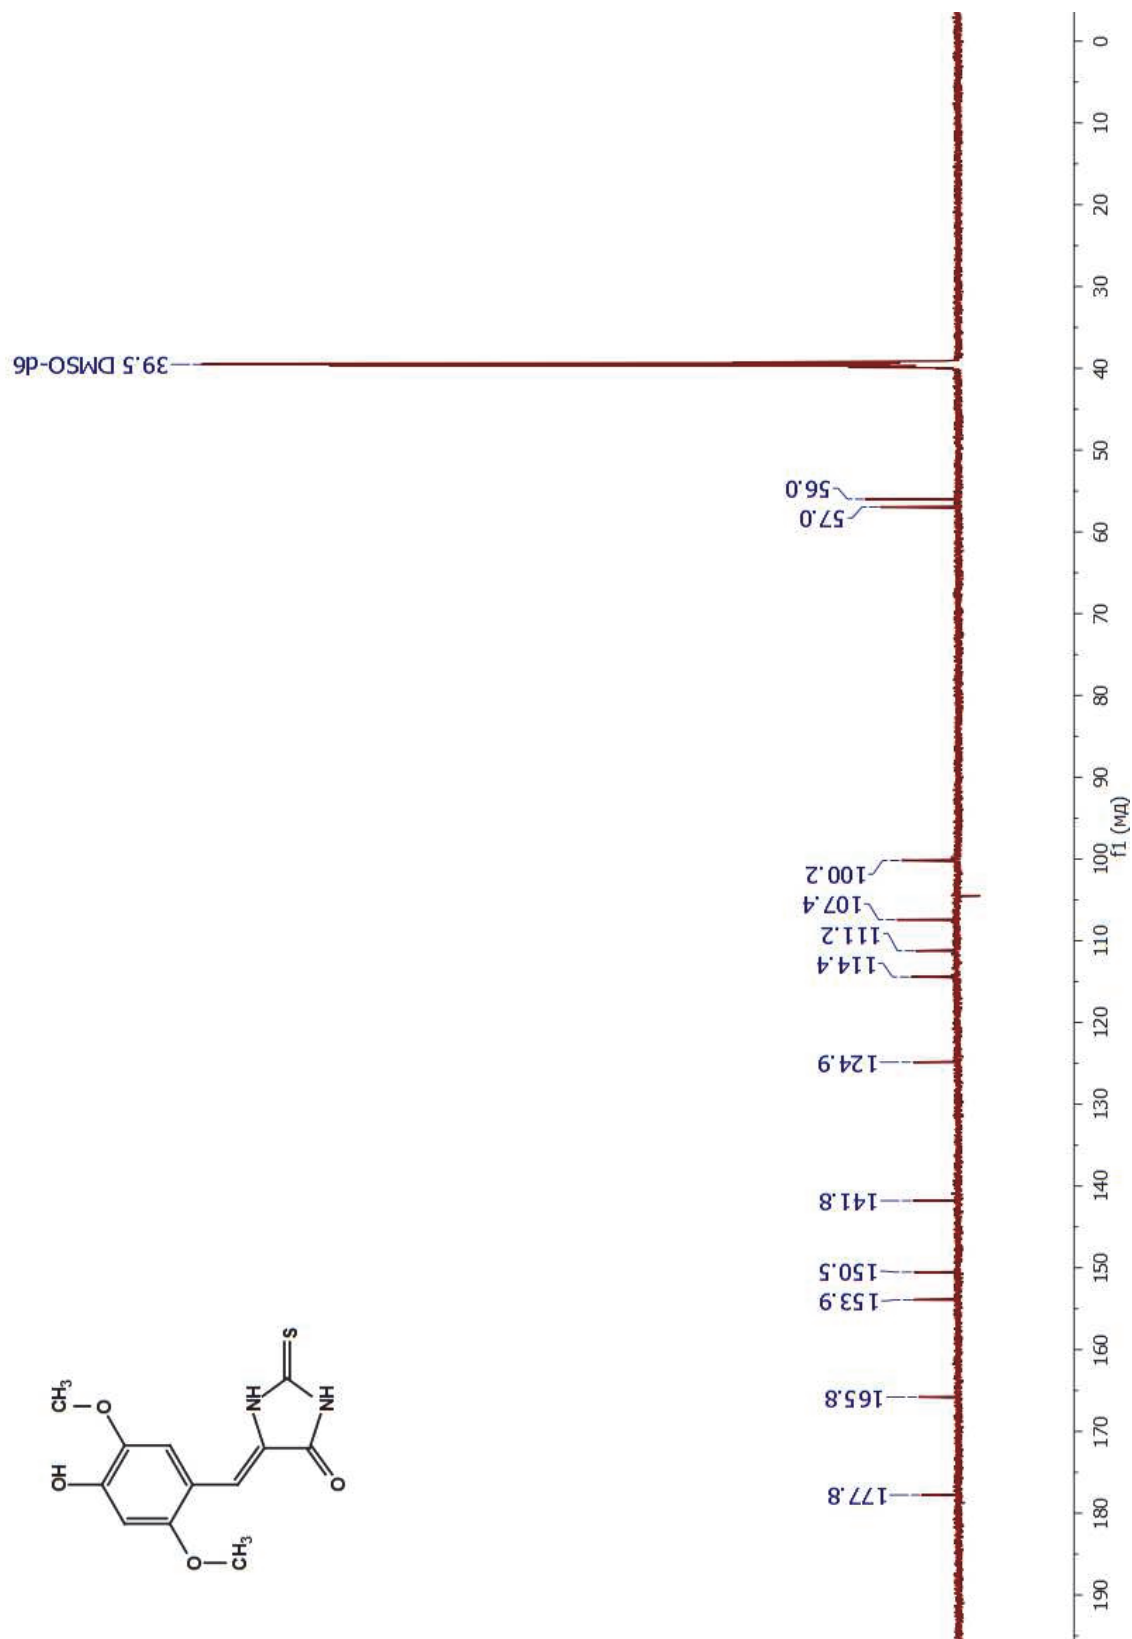



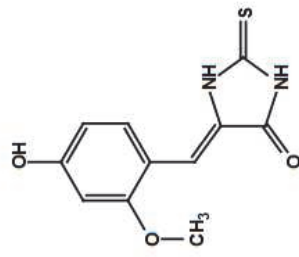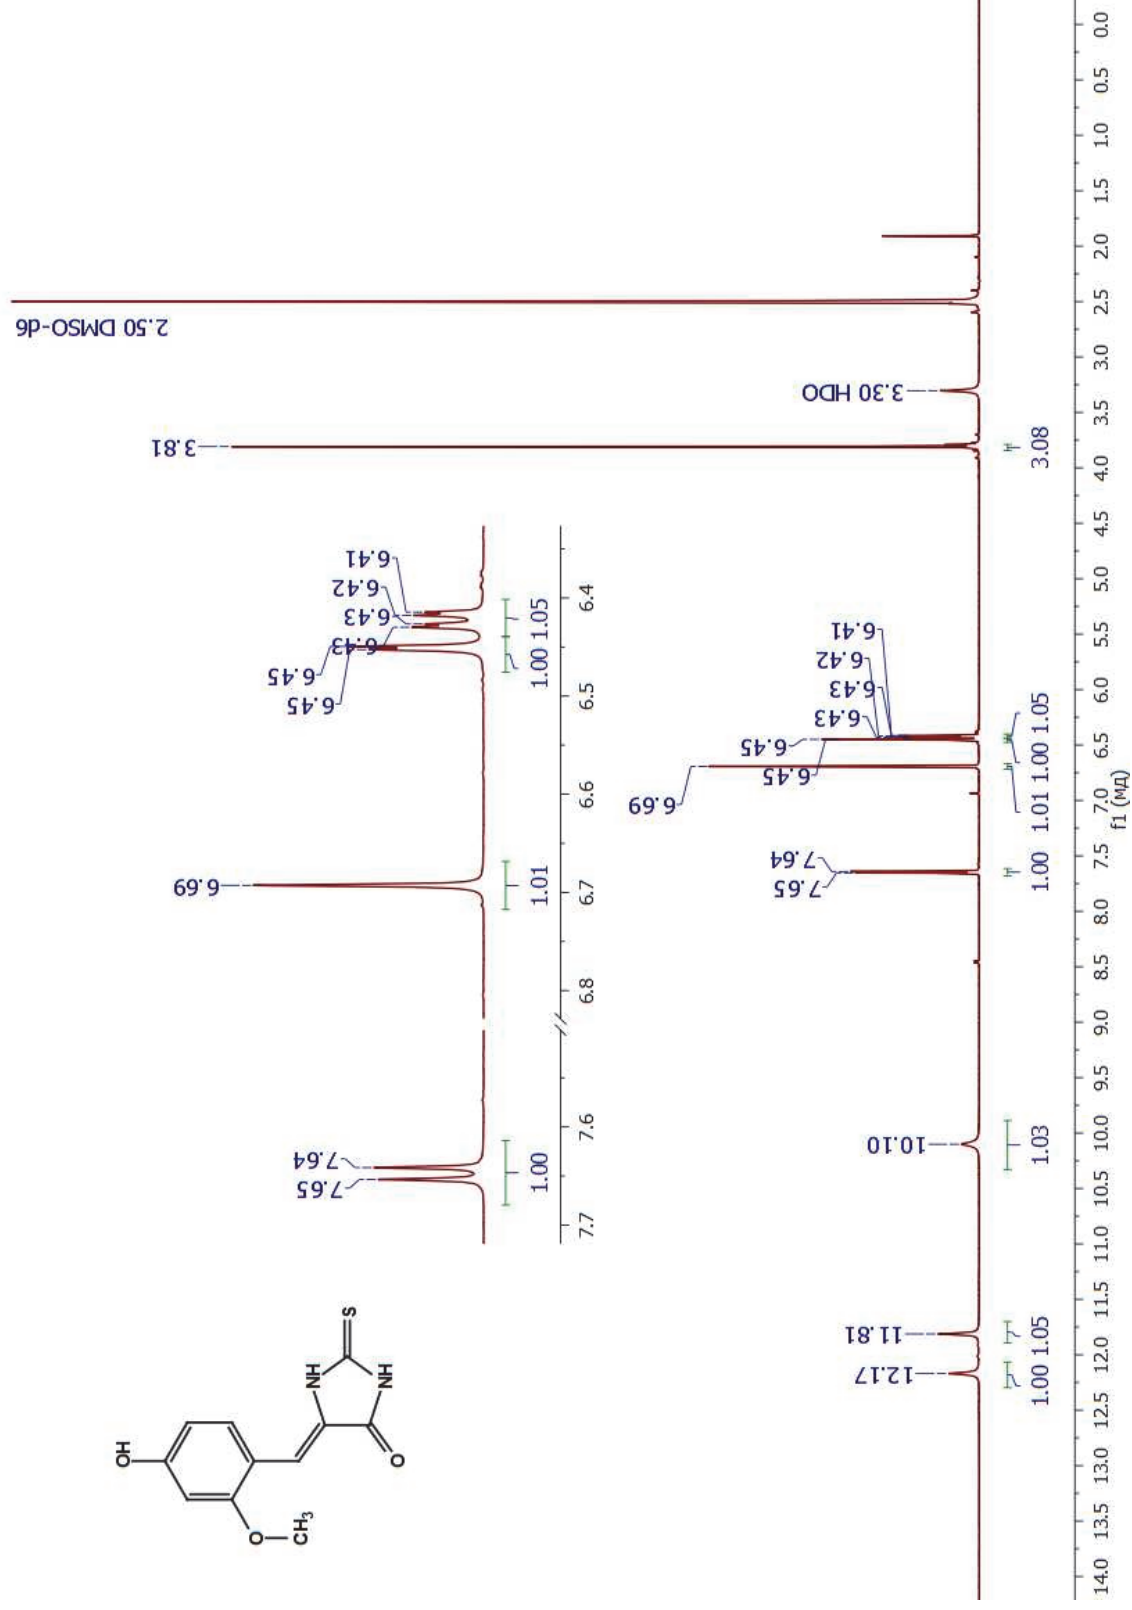

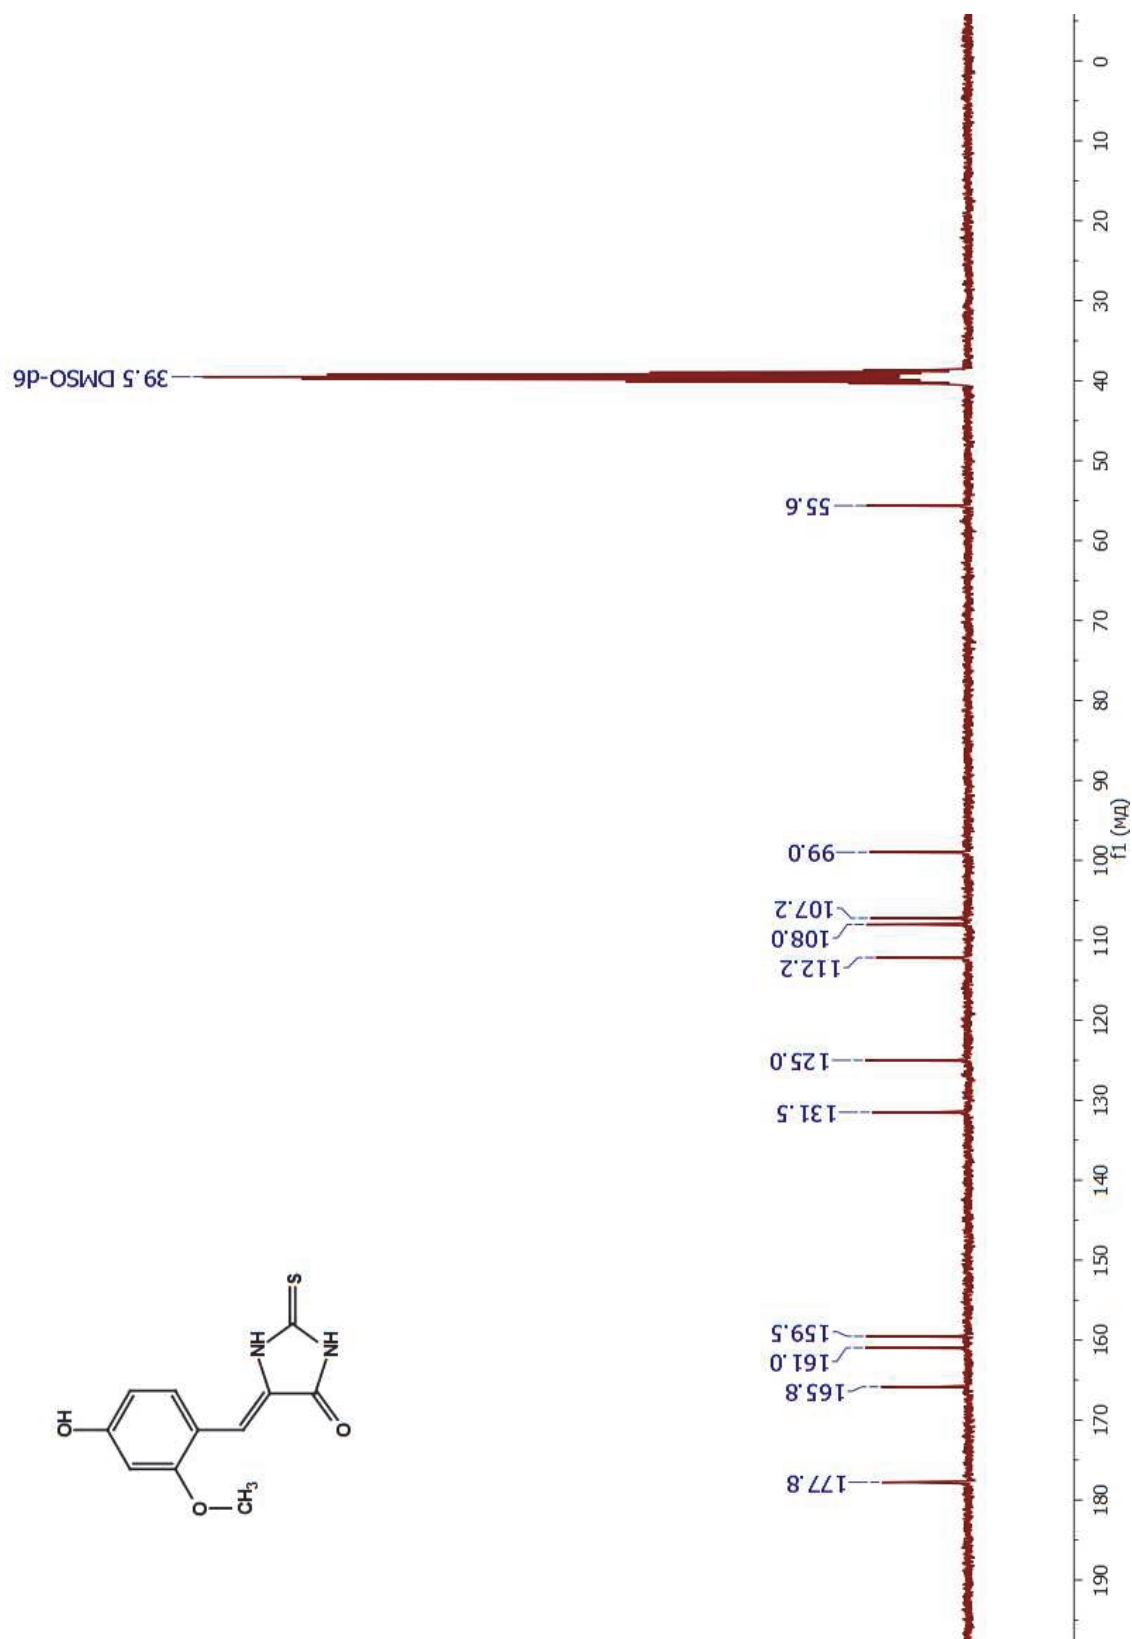

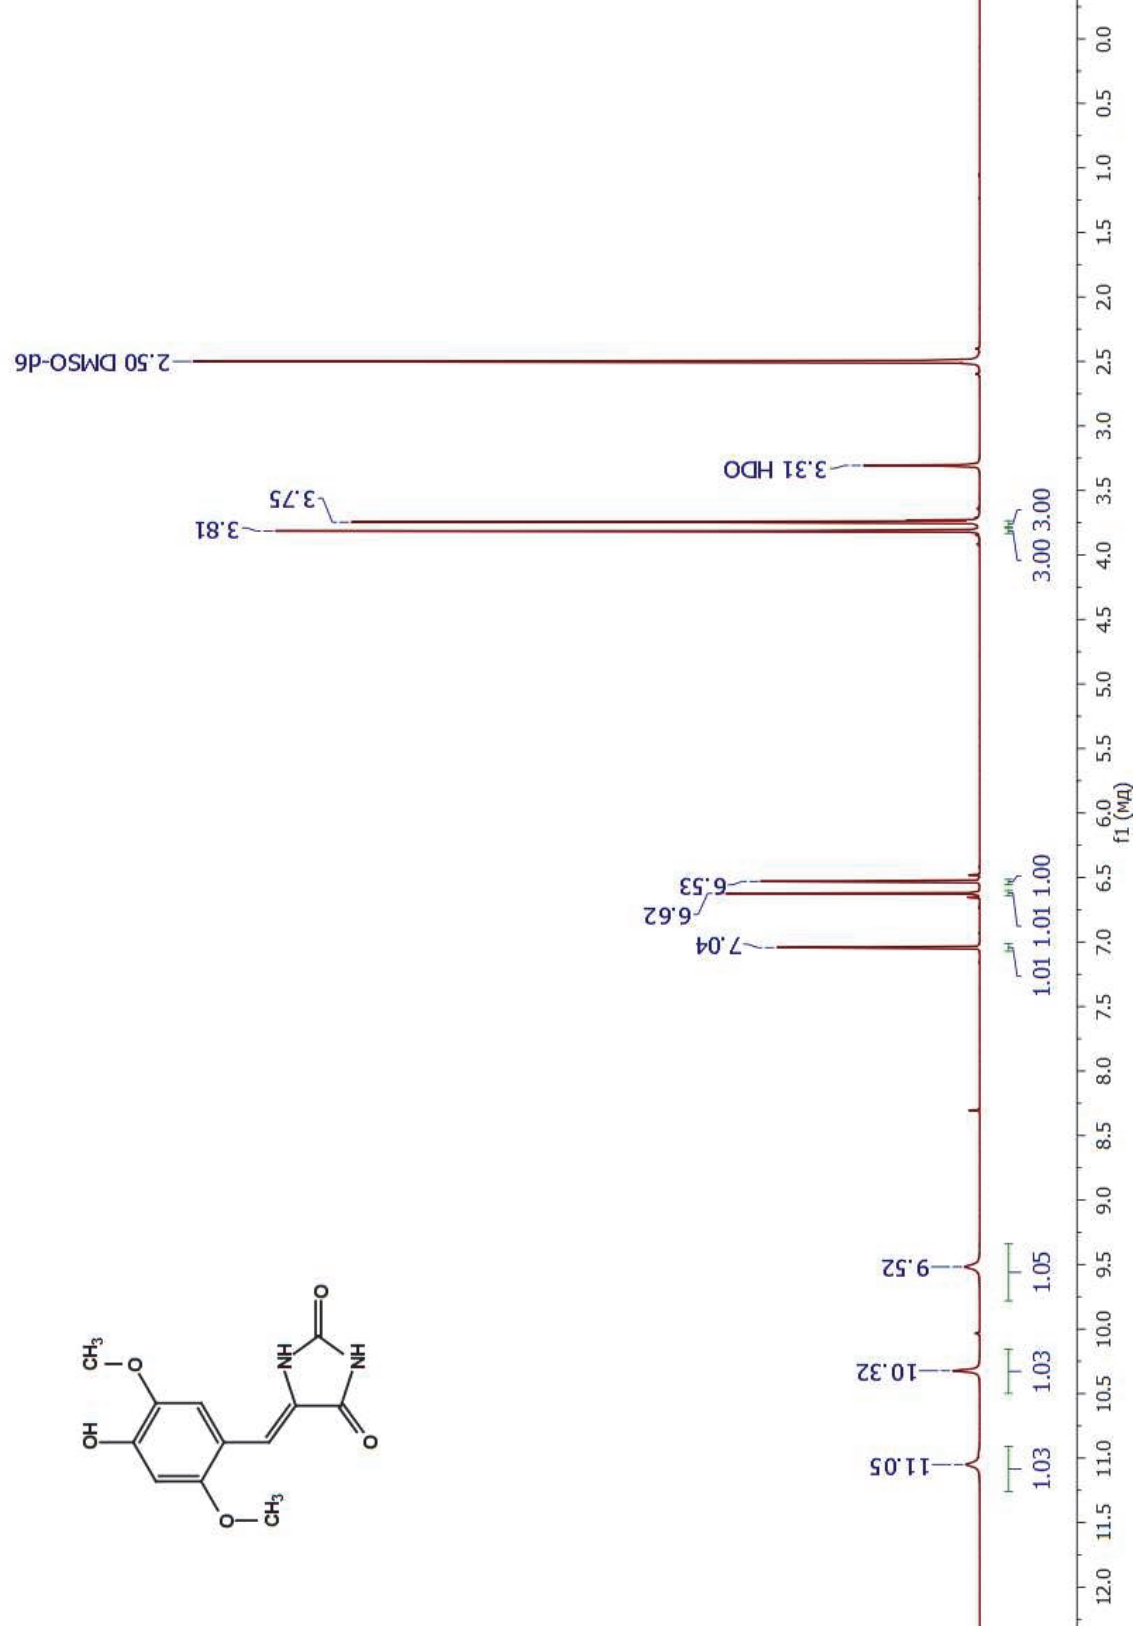

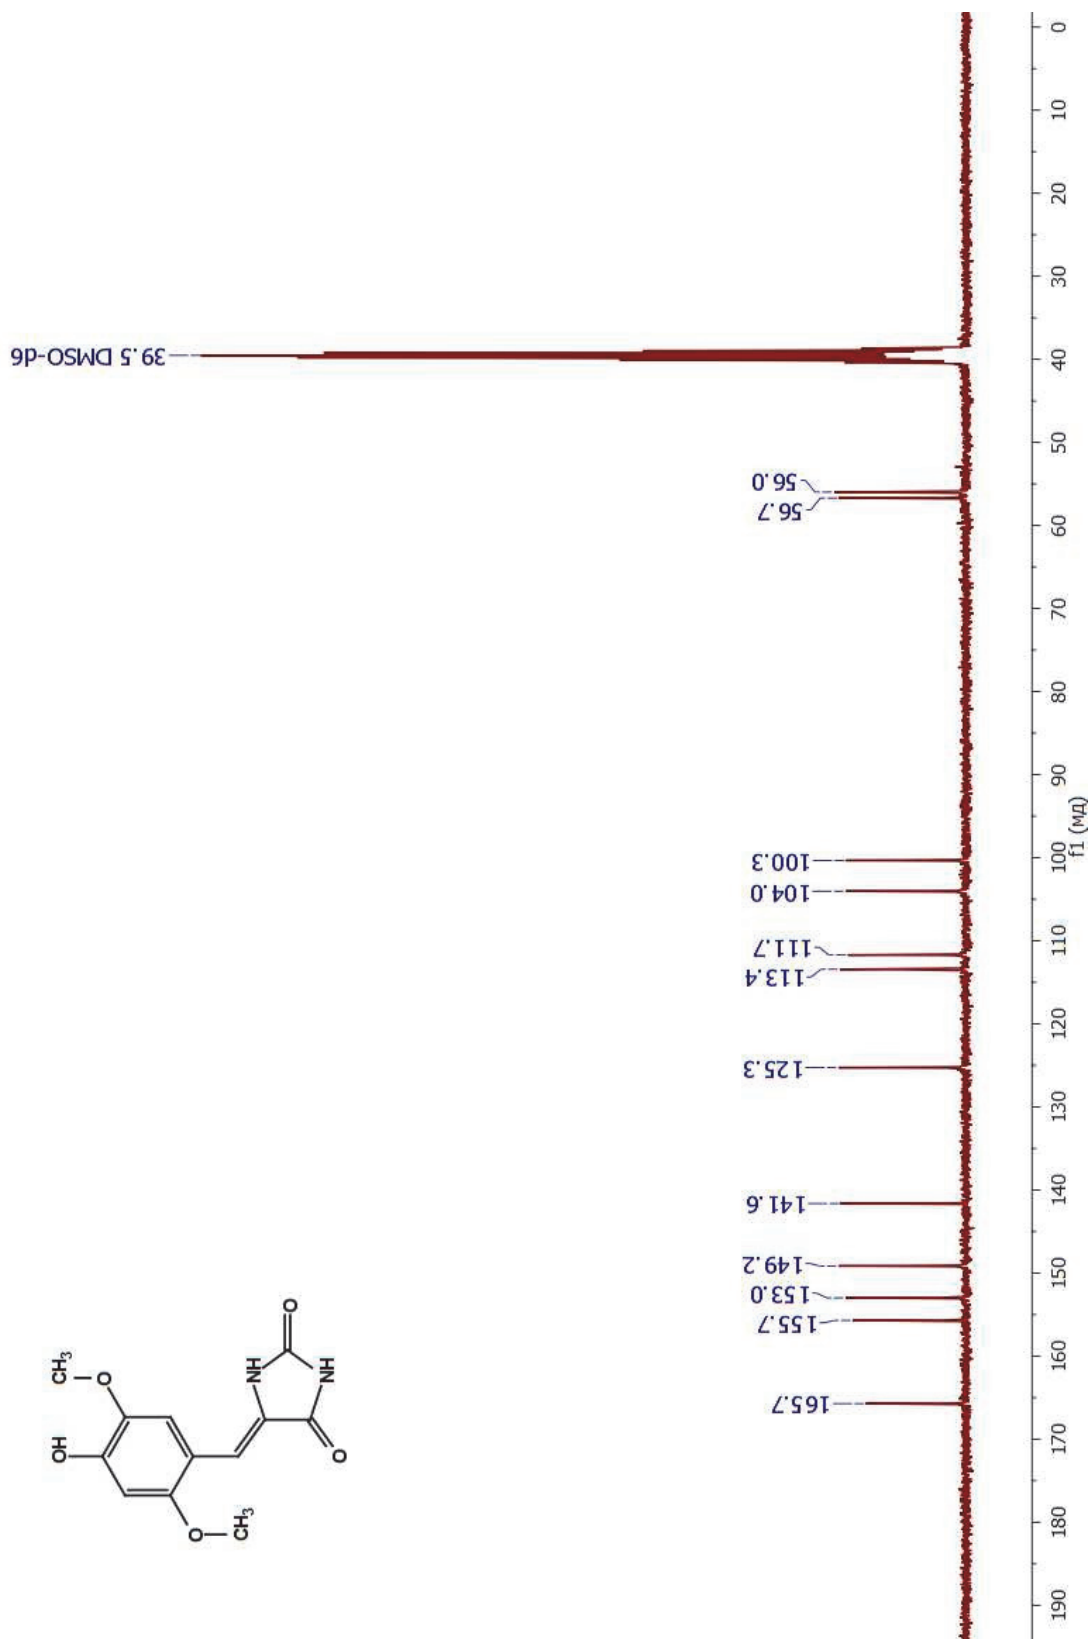

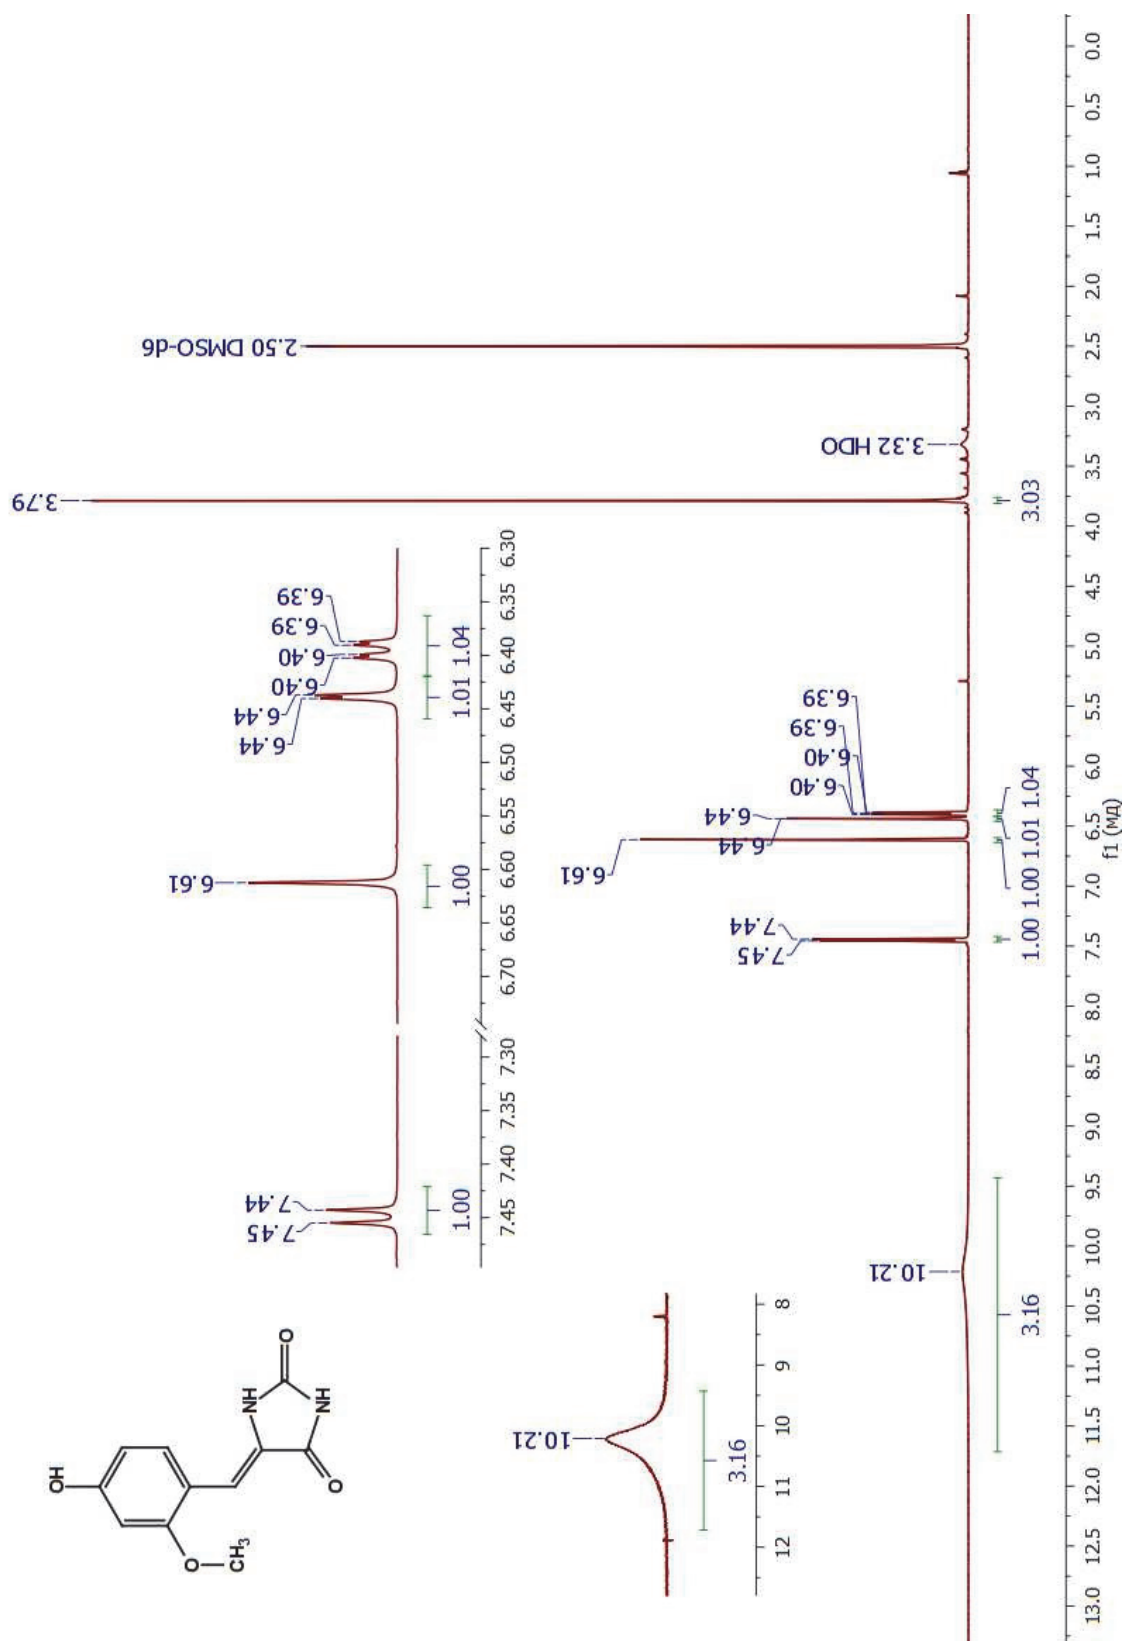

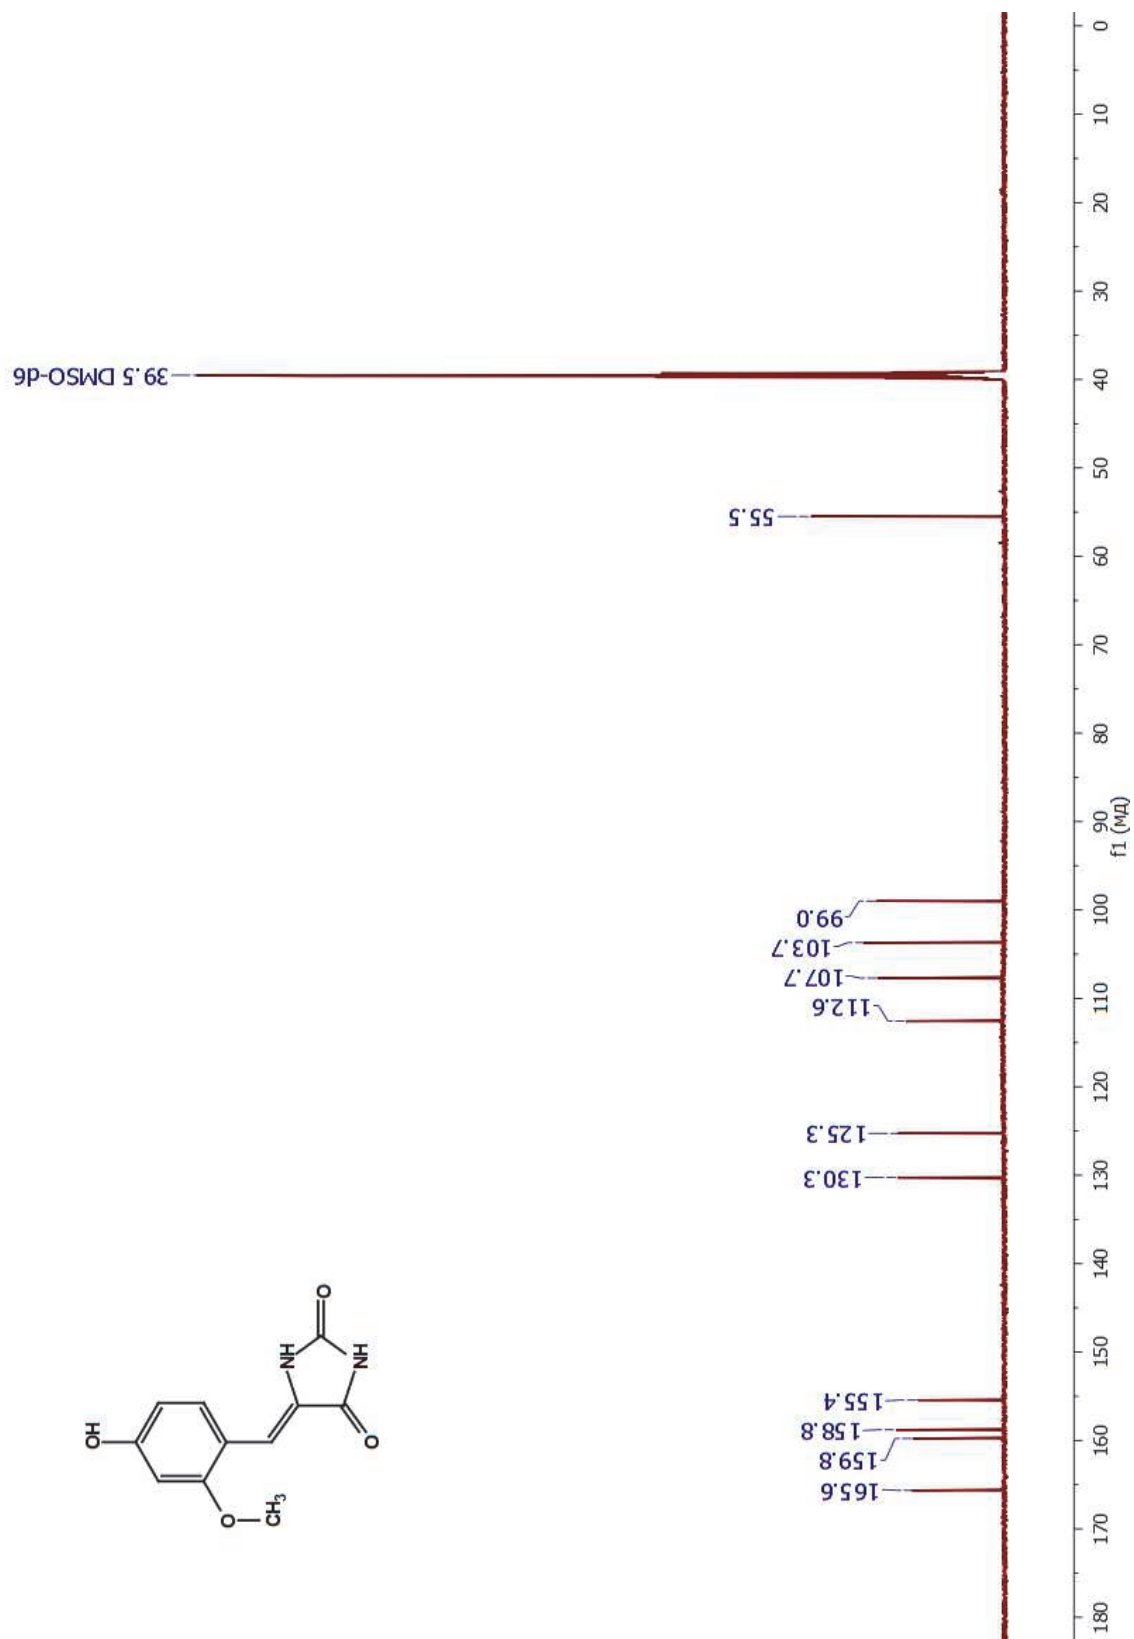

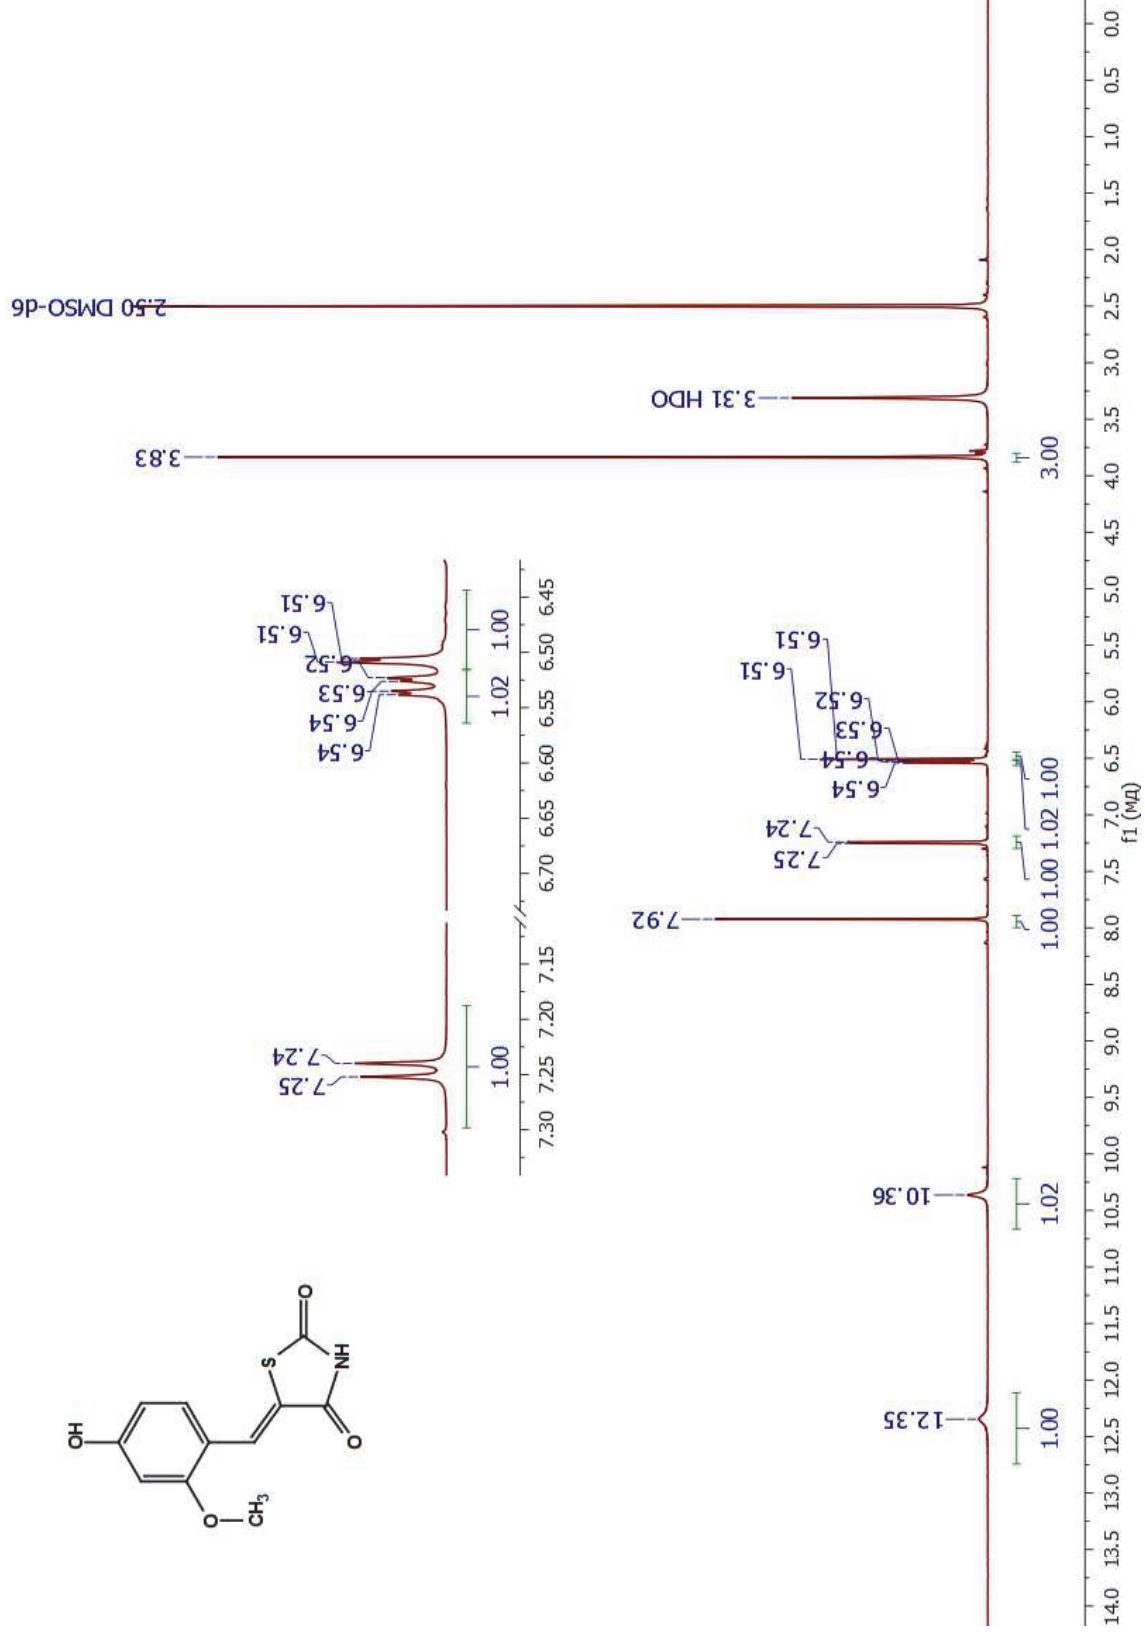

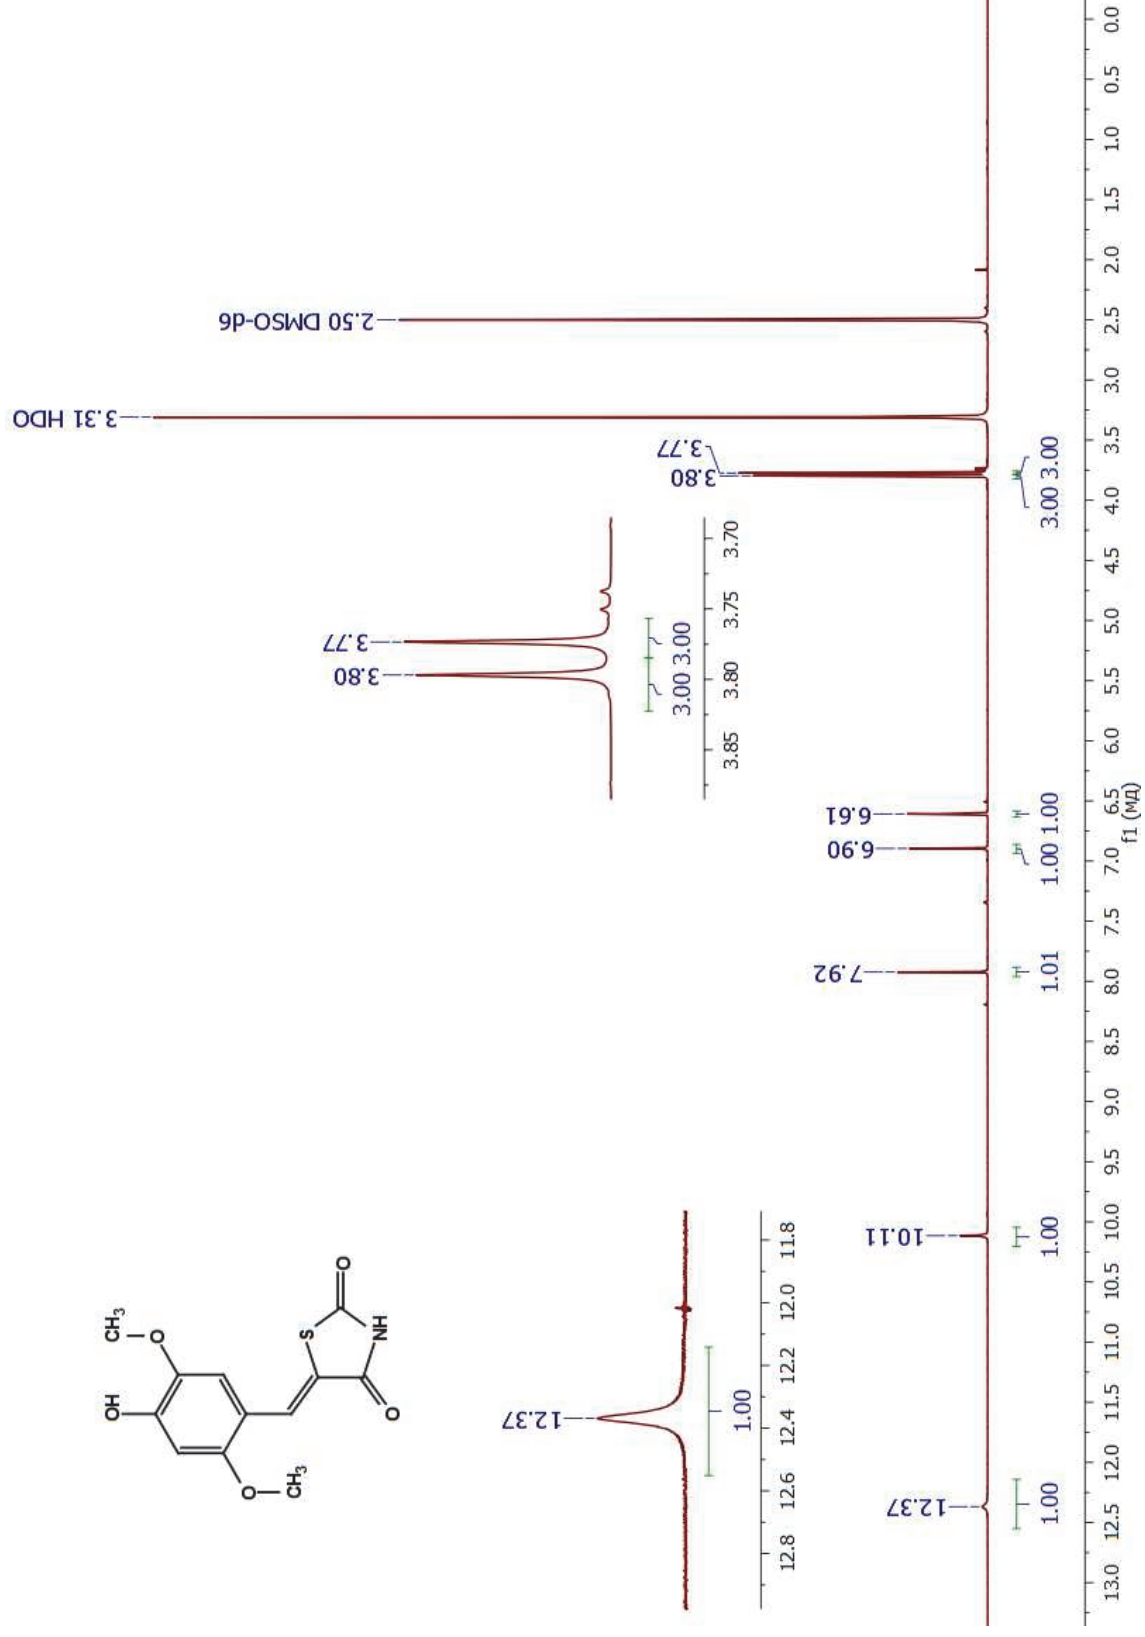



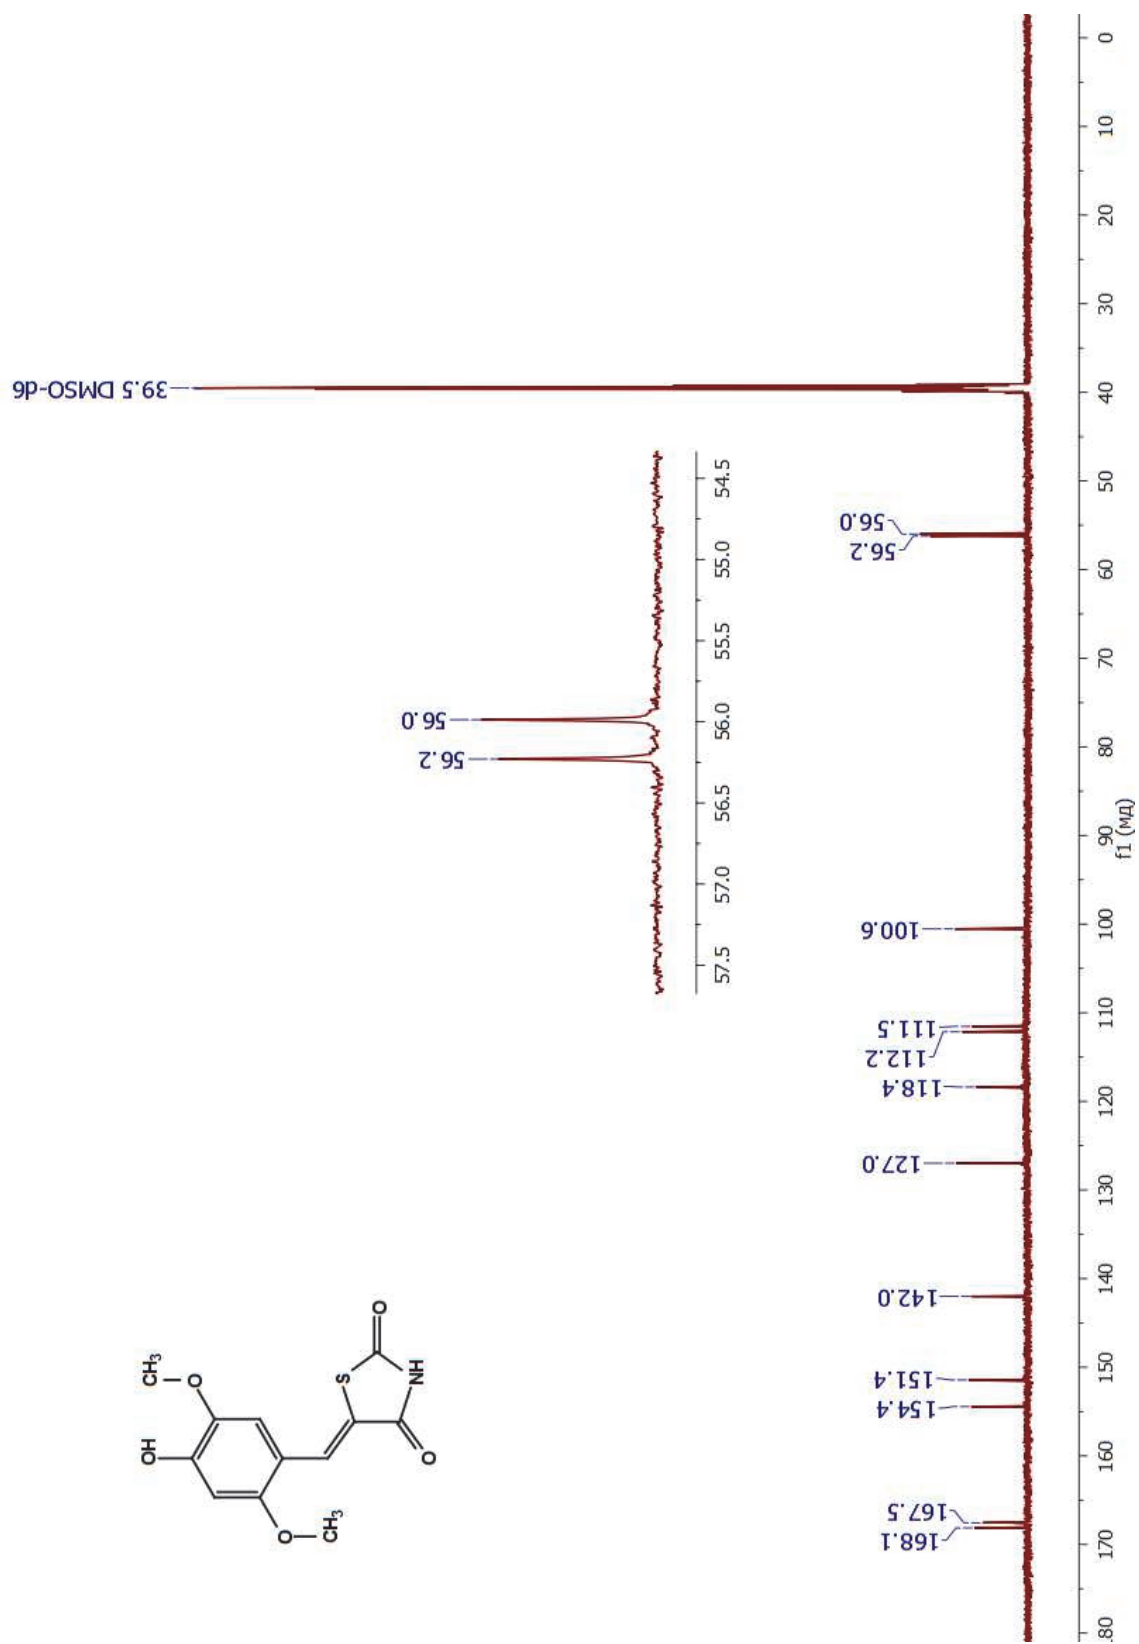

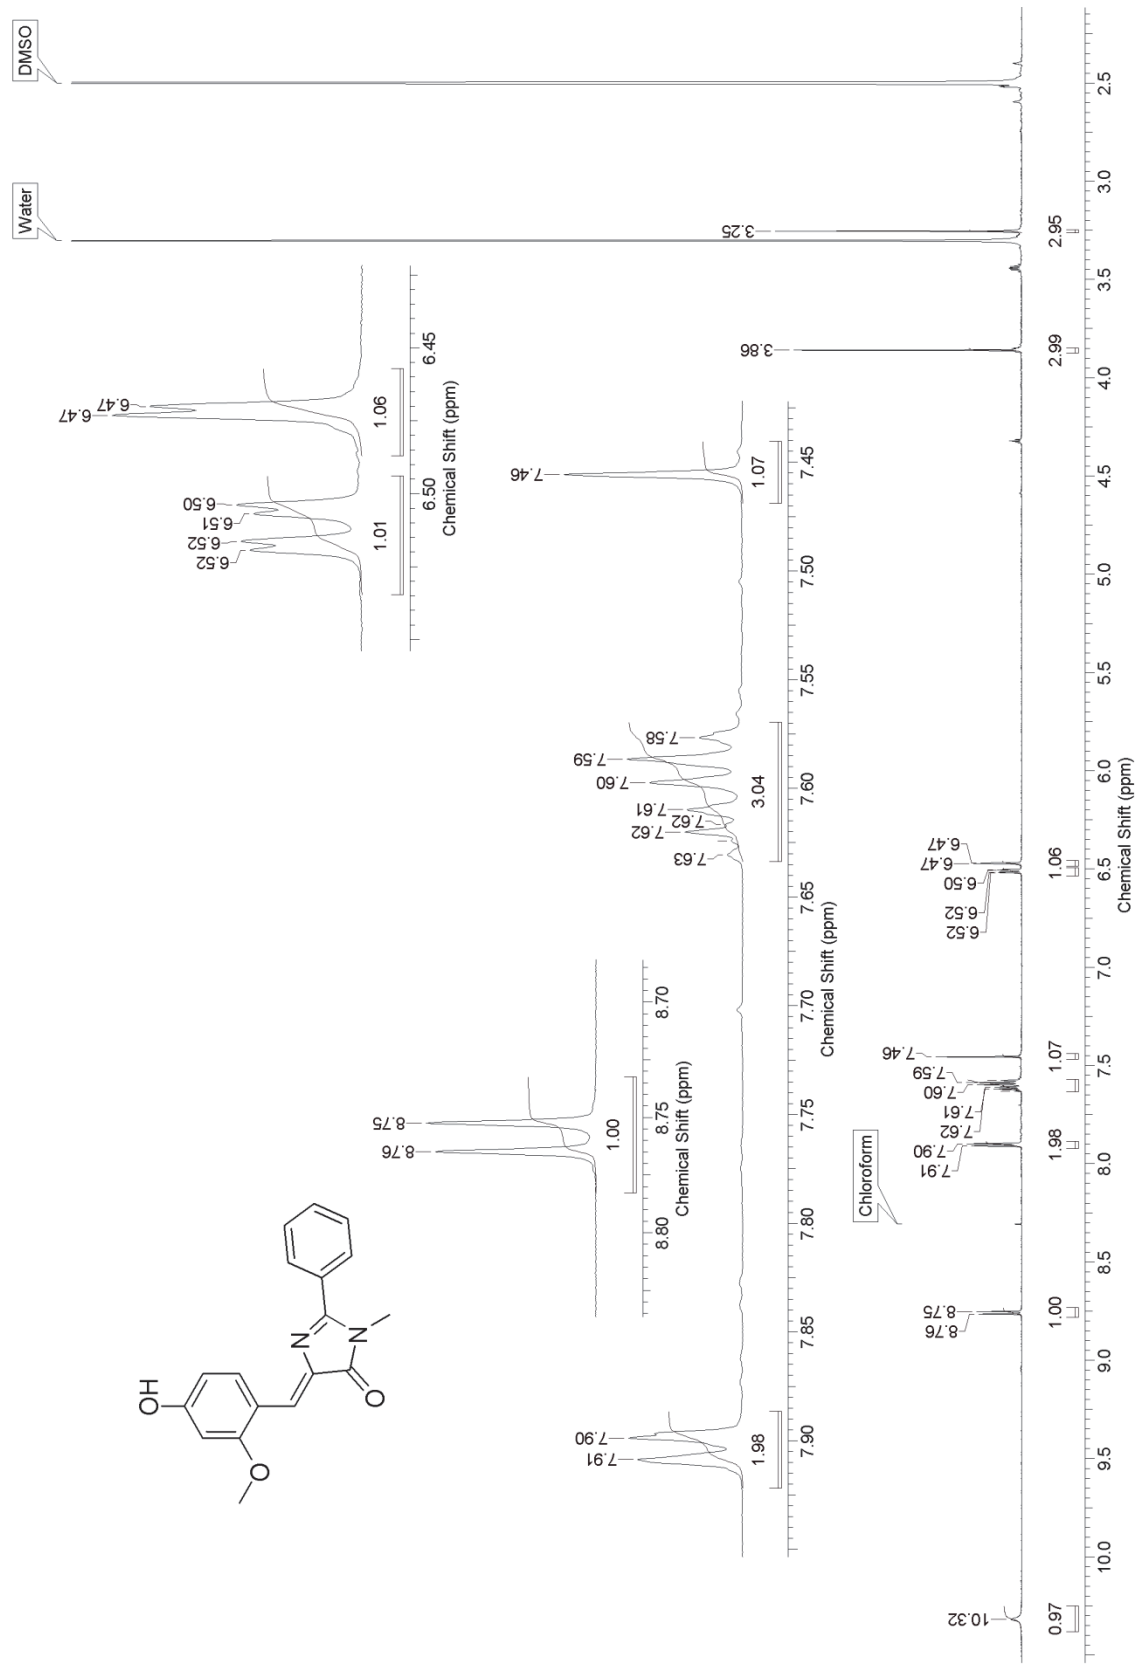

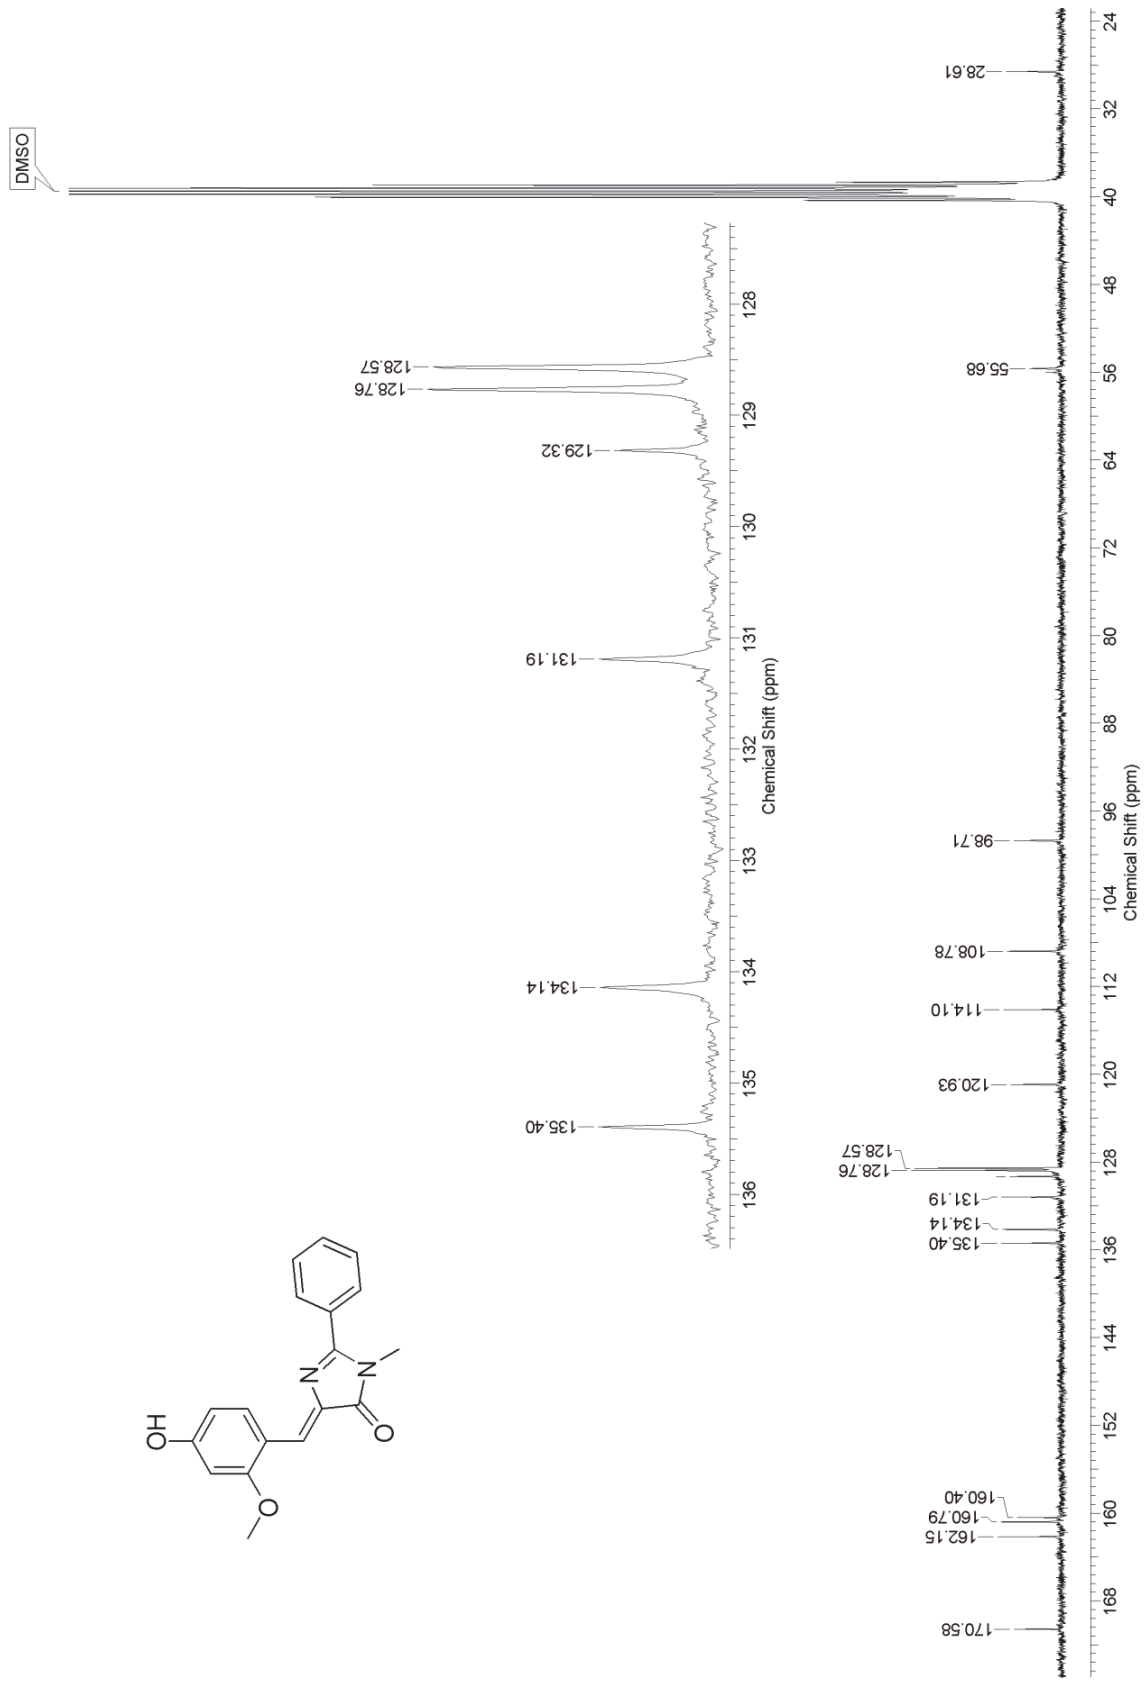

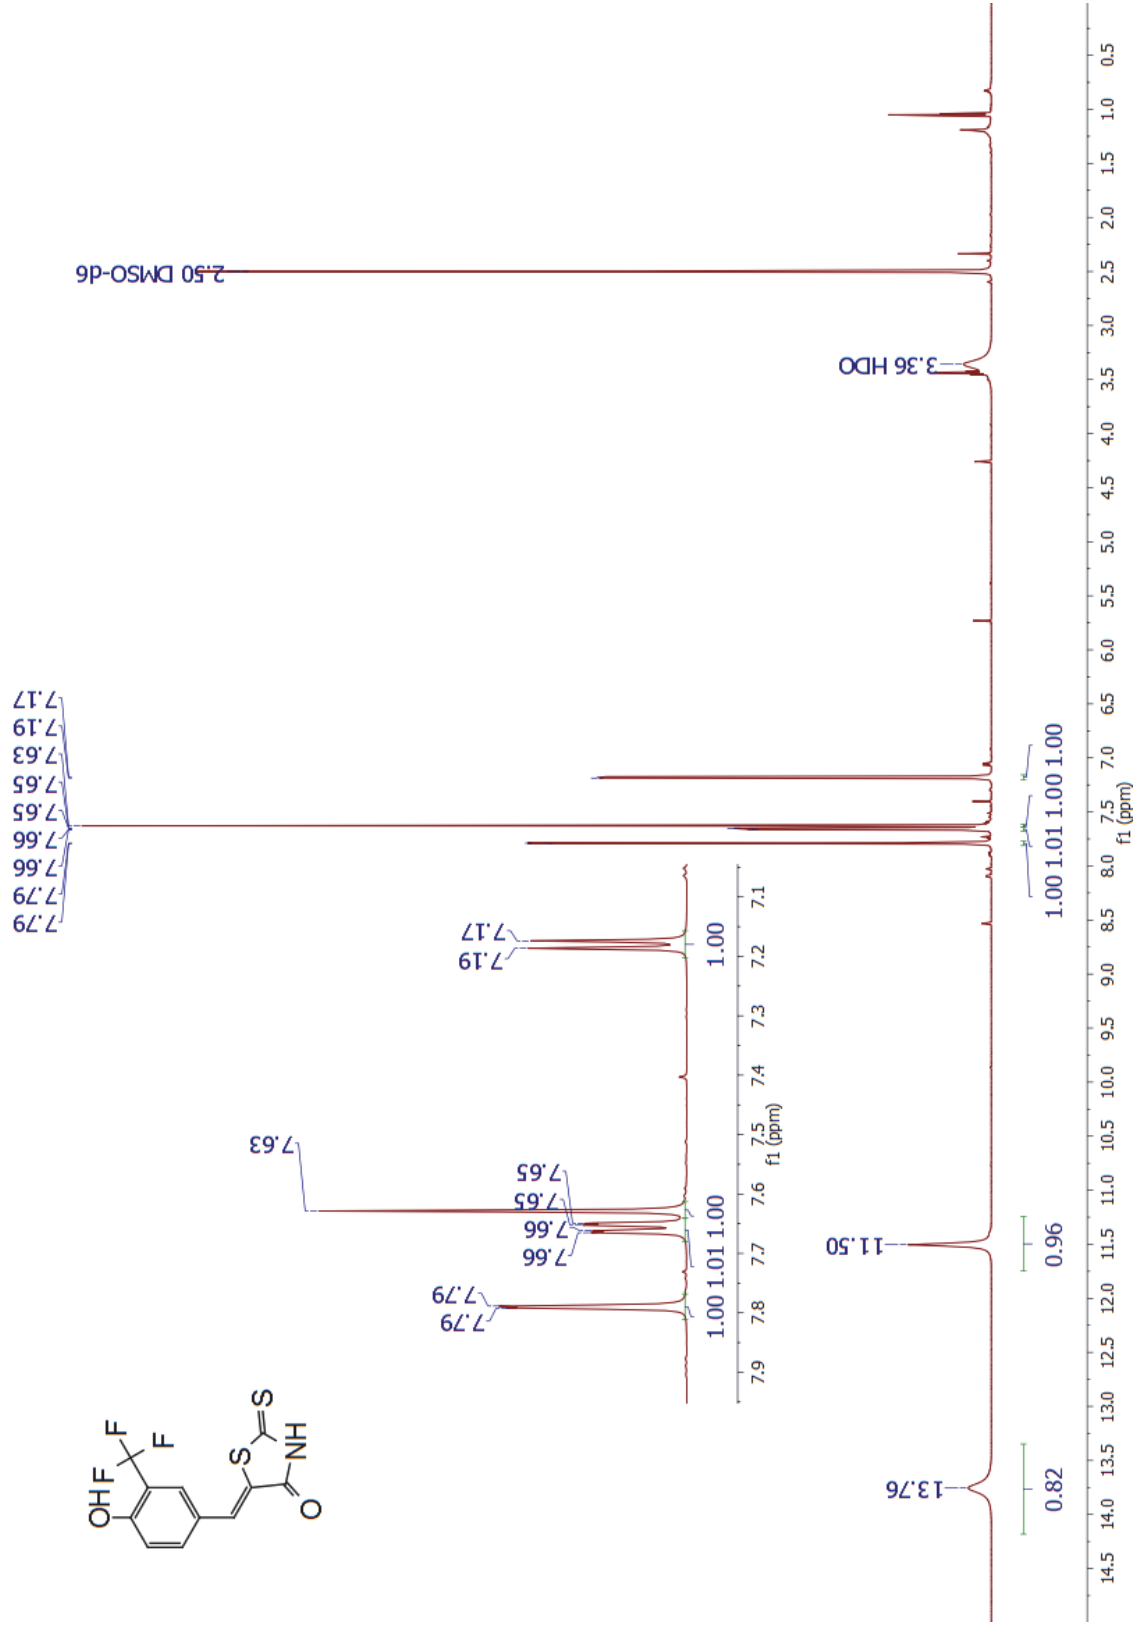

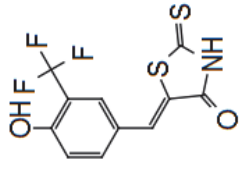

DMSO-d6

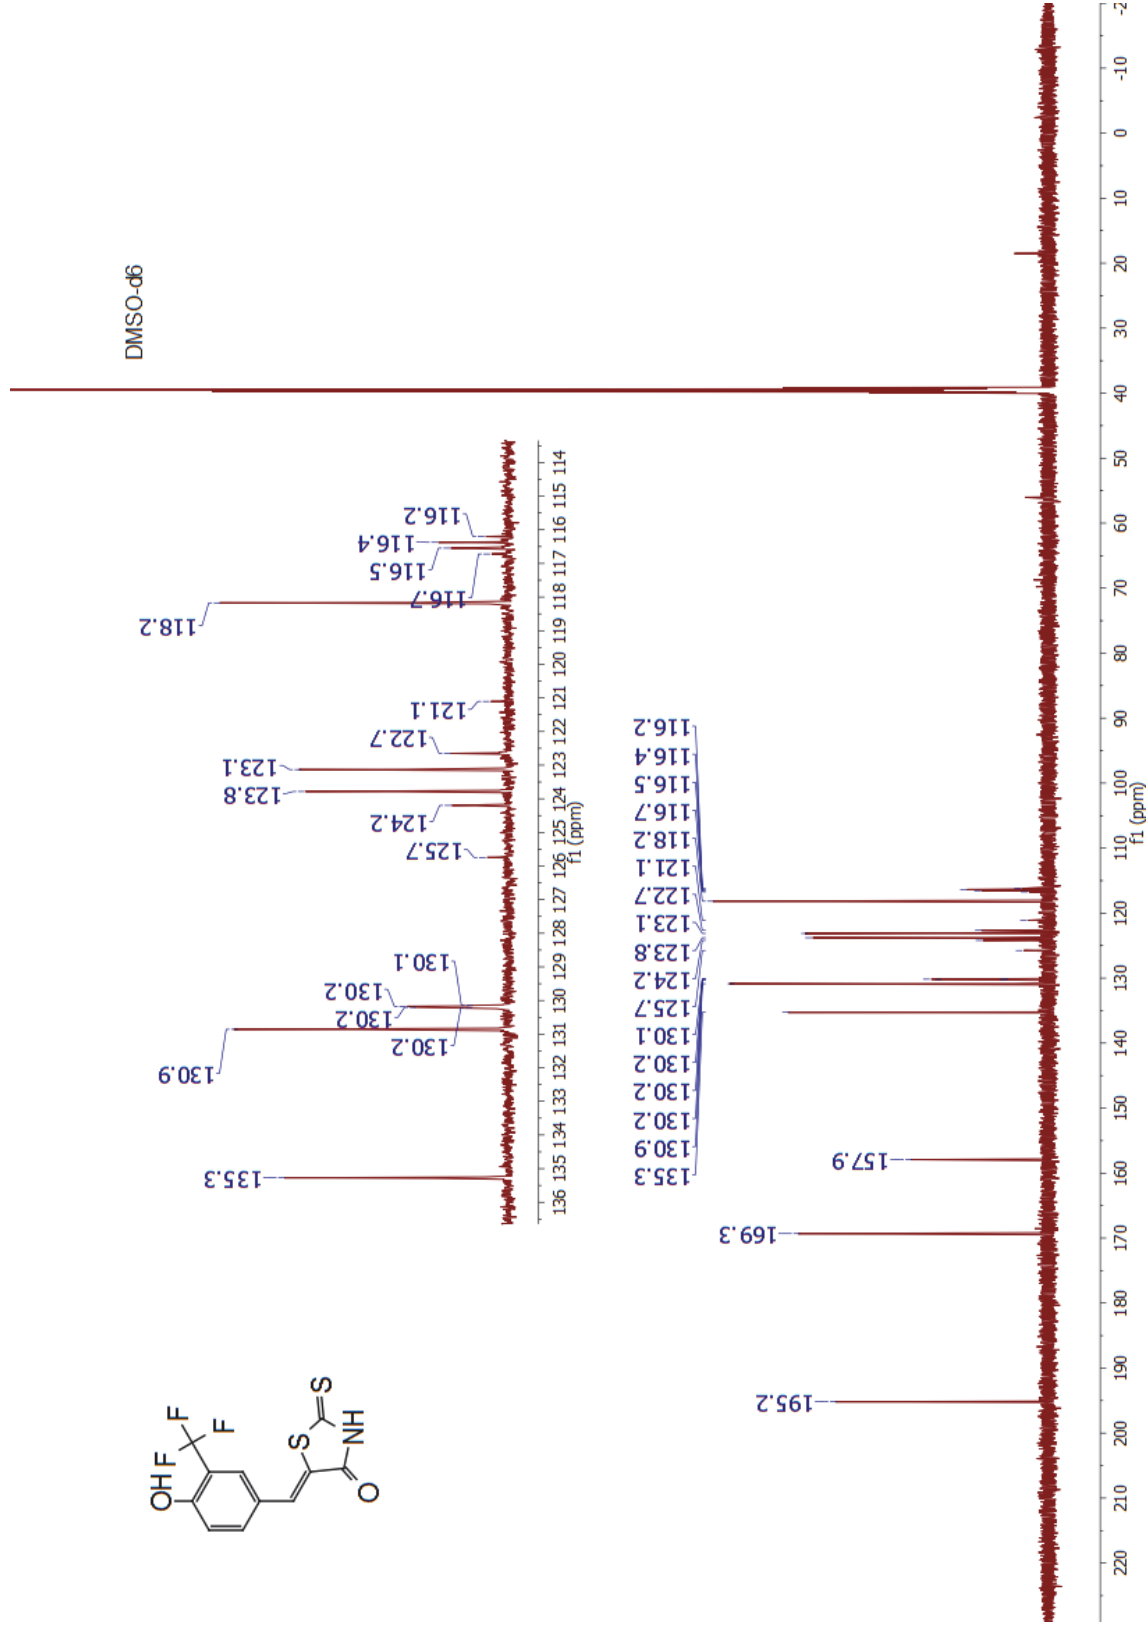

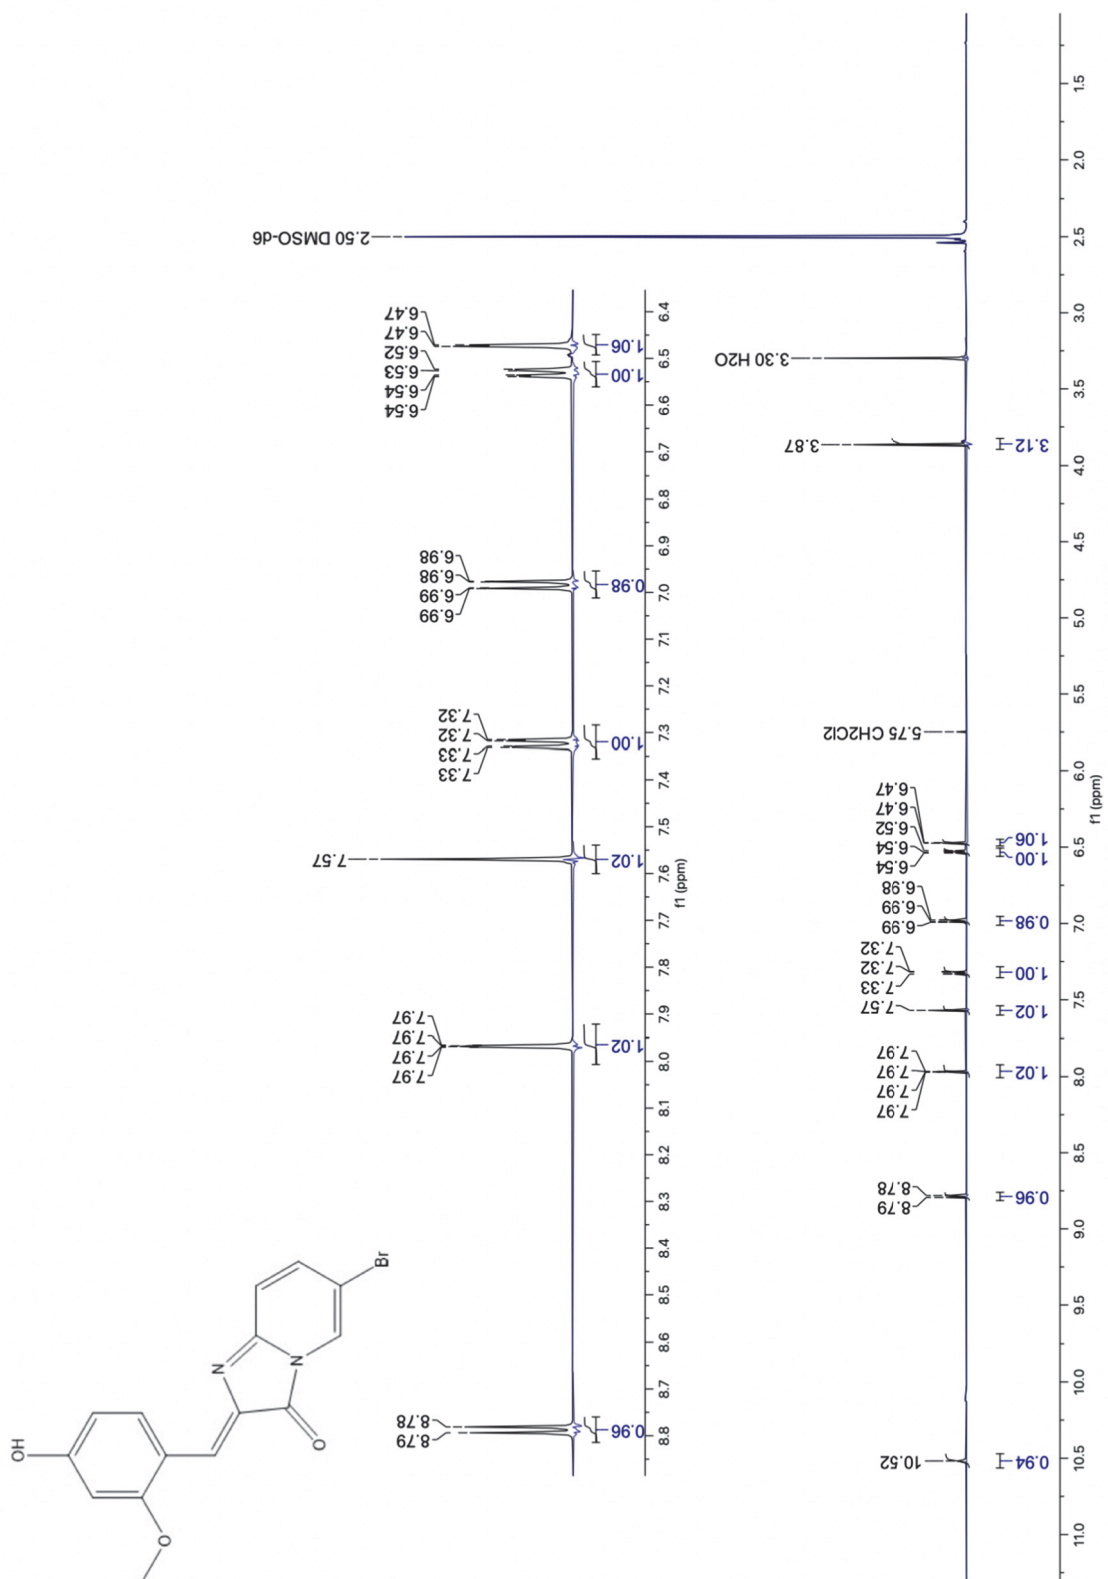

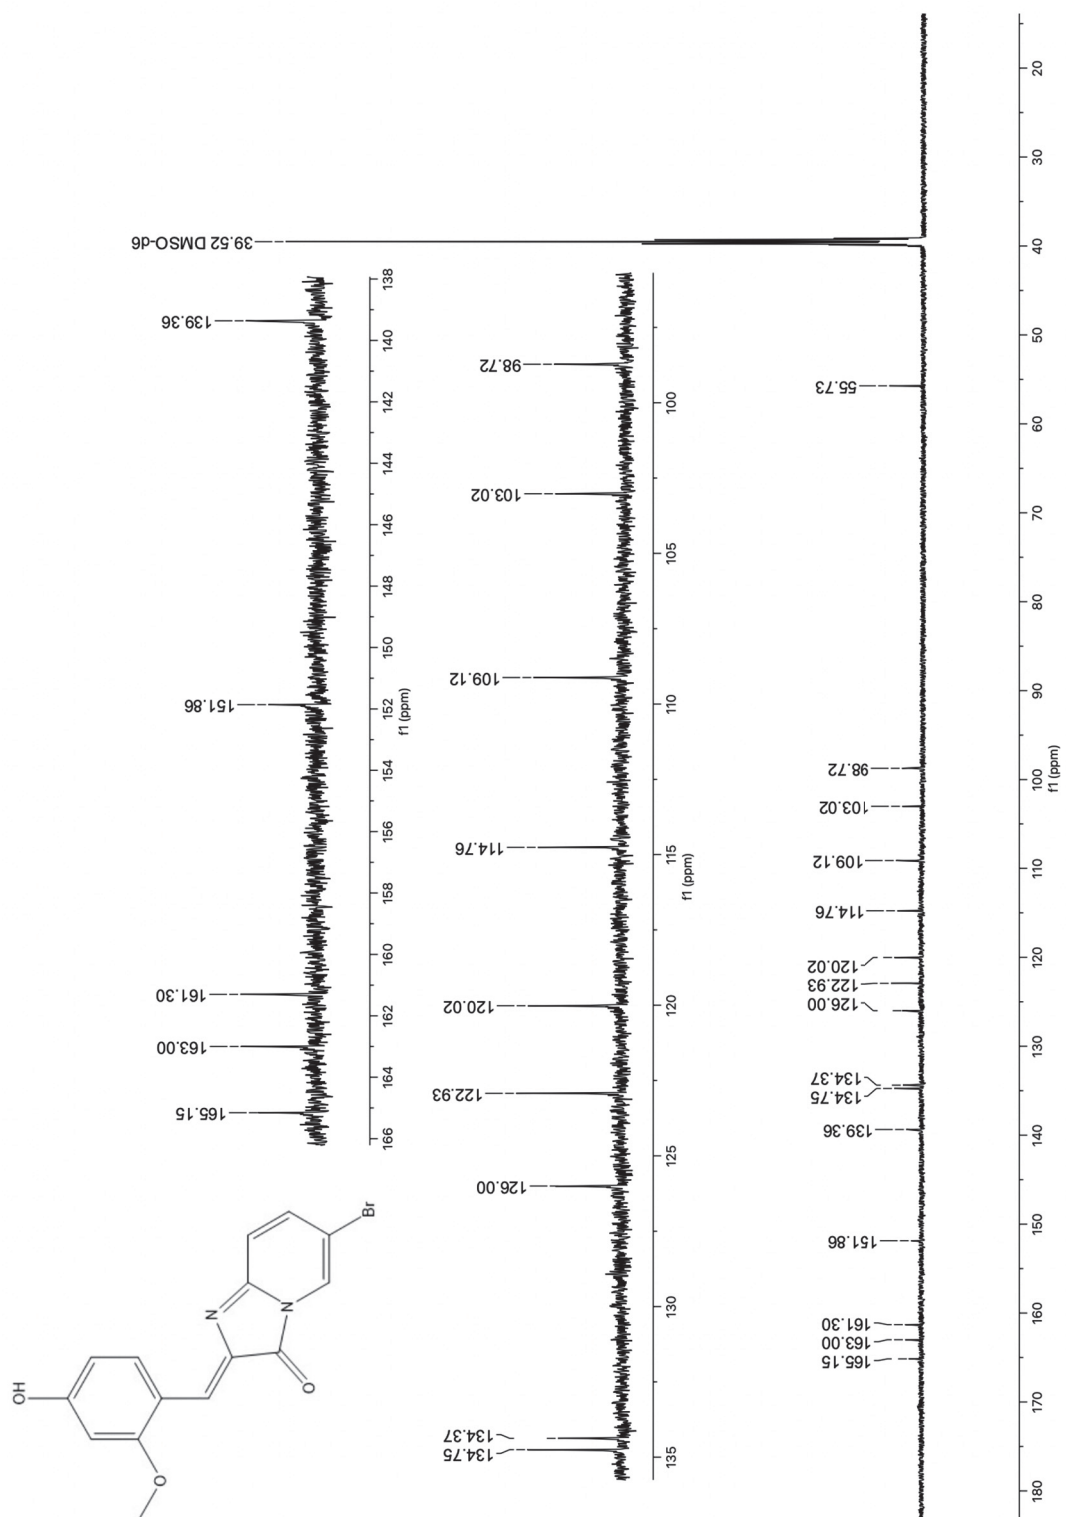

Supplement: s1 [file s1]
